# Supplementary material
Source: ML conference proceedings conference paper supplement (https://openaccess.thecvf.com/content/cvpr_2015/html/Bell_Material_Recognition_in_2015_CVPR_paper.html)
Supplement: Supplementary file 1 [file Bell_Material_Recognition_in_2015_CVPR_supplemental.pdf]

# Material recognition in the wild with the Materials in Context Database (Supplemental Material)

Sean Bell\*   Paul Upchurch\*   Noah Snavely   Kavita Bala  
Department of Computer Science, Cornell University  
{sbell,paulu,snavely,kb}@cs.cornell.edu

## 1. Overview

In the supplemental material, we present details omitted from the main paper. We present details on:  
the interface for our AMT tasks      in Section 2,  
counts of our train/val/test sets      in Section 3,  
single patch classifications results   in Section 4,  
our near-duplicate method            in Section 5,  
detailed FMD results                  in Section 6, and  
the full list of results                  in Section 7.

Our dataset, **Materials in Context Database** (MINC), is fully public and hosted online at <http://minc.cs.cornell.edu/>, which includes all data, dataset splits, and trained models, so that other researchers can reproduce our experiments.

## 2. Crowdsourcing tasks

In this section, we provide some more detail on our crowdsourcing tasks (Section 3.2 in the main paper). Figures 1, 2, and 3 show screenshots of our three-stage Amazon Mechanical Turk pipeline. We build all of our crowdsourcing infrastructure on top of the publicly available OpenSurfaces platform [1].

**Stage 1: filter by photo.** In Stage 1 (Figure 1), we determine which materials each photo contains. We enumerate all combinations of photos and materials, so that each photo is considered for all materials. Since this results in a large number of combinations to test, and we do not need high quality responses, we only ask a single worker per photo. We found it was important to include this stage, since workers in the next stage would get frustrated if they were asked to localize too many materials that aren't present in the photo.

**Stage 2: localize materials.** In Stage 2 (Figure 2), workers are shown photos that were selected by a worker in stage 1, and they are asked to click on three points in that image

\* Authors contributed equally

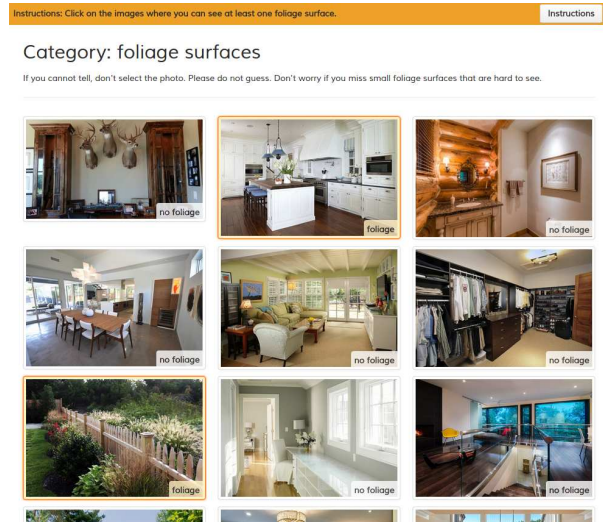

Figure 1: *Stage 1: filter by photo.* Workers select which images (out of 40) contain a given substance.

that have a given material. Since there are many false positives from stage 1, they can advance to the next photo after clicking on any number of points, including zero points. Only one worker labels each photo-material combination.

Initially, we found that the submissions were surprisingly high quality, and thus we approved all submissions immediately and did not include sentinels. After collecting most of the data, we discovered that some workers had taken advantage of our lack of quality controls in this stage. However, we were able to detect these workers and exclude their submissions by measuring the fraction of responses that agree with Stage 3 (described next).

**Stage 3: verify.** In Stage 3 (Figure 3), we verify the responses from Stage 2 by asking new workers to re-label all points without revealing the original prompts from Stage 2. Thus, if a worker in Stage 3 can select the correct material from a long list and agree with the worker from Stage 2, then we consider the material label to be sufficiently accu-

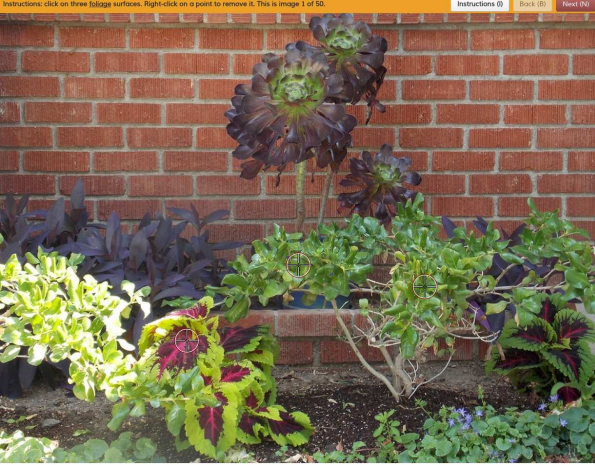

Figure 2: *Stage 2: localize materials.* Workers localize materials by clicking on 3 points in the image that contain a given material. In this example, workers have selected 3 points highlighted with red cross-hairs (zoom in to better see the selected points).

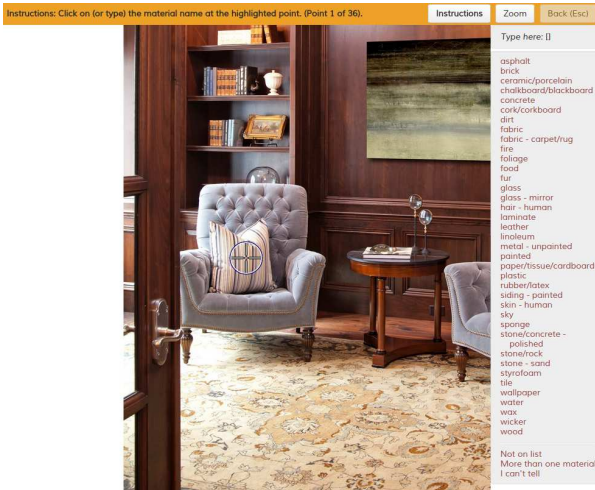

Figure 3: *Stage 3: verify.* Workers localize materials by clicking on 3 points in the image that contain a given material.

rate. If the stages disagree, then we discard the point.

Since we found that workers would avoid responding with “Not on list” or “I can’t tell”, we collected a larger list of possible material names than the other two stages. If workers select any of these extra material names, it is as if they had selected “Not on list”.

**Material categories.** When initially collecting responses, we collected a wider range of material categories than what was used for material recognition. We attempted to split

some categories into more fine-grained categories such as “Plastic - clear” and “Plastic - opaque”. However, we found that such splits introduced disagreements between workers, which led to many points being rejected (points are only kept if workers can agree on the category). Further, some categories are genuinely confusing (such as laminate countertops designed to look like another stone). Thus, we grouped categories together and re-computed worker agreement with the coarser set of categories.

### 3. Sample distribution

From labeled clicks and segments we get a large set of patch centers. Each patch center is a sample for the learning system. Our goal is to randomly split our samples into train/val/test in ratios of 84/6/10. However, it is also necessary to ensure there are enough individual segments in the test set so that segment accuracy can be evaluated for full-scene material classification. In addition we wanted to balance the distribution across category, photo source (Houzz versus Flickr) and sample source (click versus segment).

Splits were created by gathering samples into clusters based on near-duplicate detection. The statistics of each cluster were computed and placed into a matrix where rows are clusters and columns are the cluster statistics. The matrix rows were randomly shuffled and two indices were found which split the set into ratios of 84/6/10. Then rows were greedily exchanged to satisfy constraints: (i) at least 75 segments per category in test, (ii) every measured statistic is strictly positive. A split is scored by the magnitude of the relative error of train and validate against test. This process was repeated several times and the split with lowest relative error was taken. Detailed counts of the split used in all experiments are shown in Table 1.

### 4. Patch classification

In Figure 4 we present a confusion matrix of single patch classifications with GoogLeNet (test set). The matrix has been normalized so that rows sum to 100%. Notable confusions are: 8.2% of *brick* predicted as *stone*, 8.2% of *mirror* predicted as *painted*, 5.7% of *mirror* predicted as *glass*, 5.9% of *paper* predicted as *plastic*, 5.9% of *plastic* predicted as *ceramic*, and 5.6% of *leather* predicted as *fabric*.

In Figure 5 we present a visualization of the preceding confusion matrix. Each cell of the matrix has been visualized by 16 patches whose true labels and predicted labels correspond to that entry of the matrix. (patches selected randomly). Since correct classifications only appear in the diagonal, the visualization, by design, shows many more incorrect classifications than correct ones.

In Figure 7 we present a larger version of Figure 7 from the main paper with each category identified. See Section 5.1 of the main paper for a description.

## 5. Near-duplicate detection

To detect near-duplicates (Section 4.1 of the main paper), we compute AlexNet fc6 features for all images. We normalize the features, project them down to 1024 dimensions using PCA, and then re-normalize them. Two normalized features  $f_1$  and  $f_2$  are considered to be duplicates if:

$$f_1 \cdot f_2 \geq 0.9$$

To ensure we don't miss any duplicates, we perform all  $O(n^2)$  comparisons brute-force. See Figure 6 for example clusters of near-duplicate images.

## 6. FMD experiments

We found that combining a pretrained AlexNet with the approach of [2] exceeds both a finetuned AlexNet and the best reported result of [2]. Specifically, we take the reference BVLC AlexNet model, classify each image (warped to be square) with 15x oversampling (scales:  $\{0.5, \sqrt{0.5}, 1\}$ , crops: center and corners). The mean fc7 vector is extracted (4096 dim). Using the publicly available code of [2], Fisher vectors were concatenated with mean fc7 vectors and a classifier was trained with stochastic dual coordinate ascent linear SVM ( $\lambda = 0.0002$ ) on 10 random splits (500 training samples, 500 testing). As shown in Table 2, the combination of AlexNet and Fisher vectors was superior to either feature alone. It was also better than finetuning AlexNet (5 folds, 700/100/200 train/validate/test samples, trained as described in Section 4.1 of the main paper, tested with oversampling).

For all  $\pm$  uncertainties (both in Table 2 and in the main paper), we report the uncertainty of the mean (i.e.,  $\sqrt{\text{stdev}/N}$  where  $N$  is the sample count) rather than standard deviations.

| Classifier | Features | Mean Accuracy    | Trials    |
|------------|----------|------------------|-----------|
| Linear SVM | fv       | $59.3 \pm 0.5\%$ | 14 splits |
| Linear SVM | fc7      | $62.5 \pm 0.4\%$ | 14 splits |
| AlexNet    |          | $66.5 \pm 1.5\%$ | 5 folds   |
| Linear SVM | fv+fc7   | $69.6 \pm 0.3\%$ | 10 splits |

Table 2: FMD mean class accuracy of a finetuned AlexNet and a linear SVM with combinations of pretrained AlexNet (fc7) and Fisher vector (fv) features. For comparison, the previous best is 67.1 (“Combined” features of [2]).



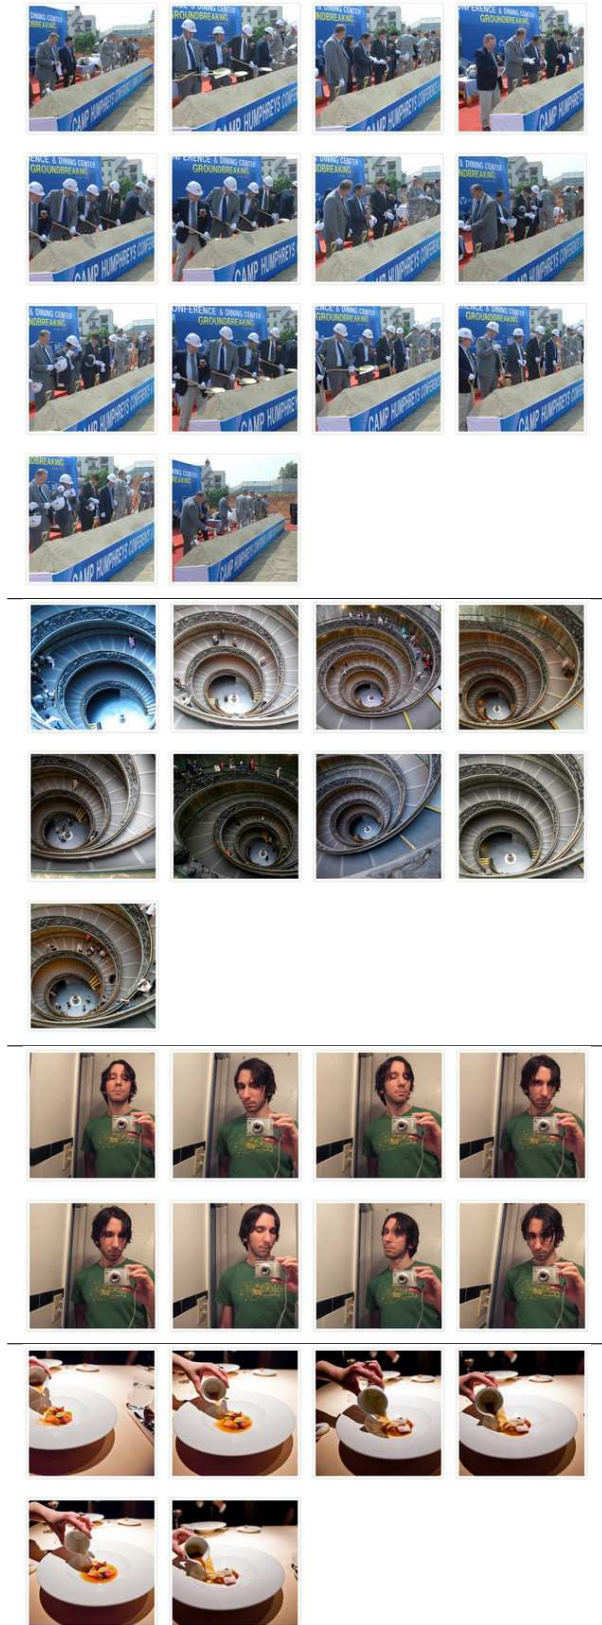

Figure 6: Example clusters of near-duplicate images.

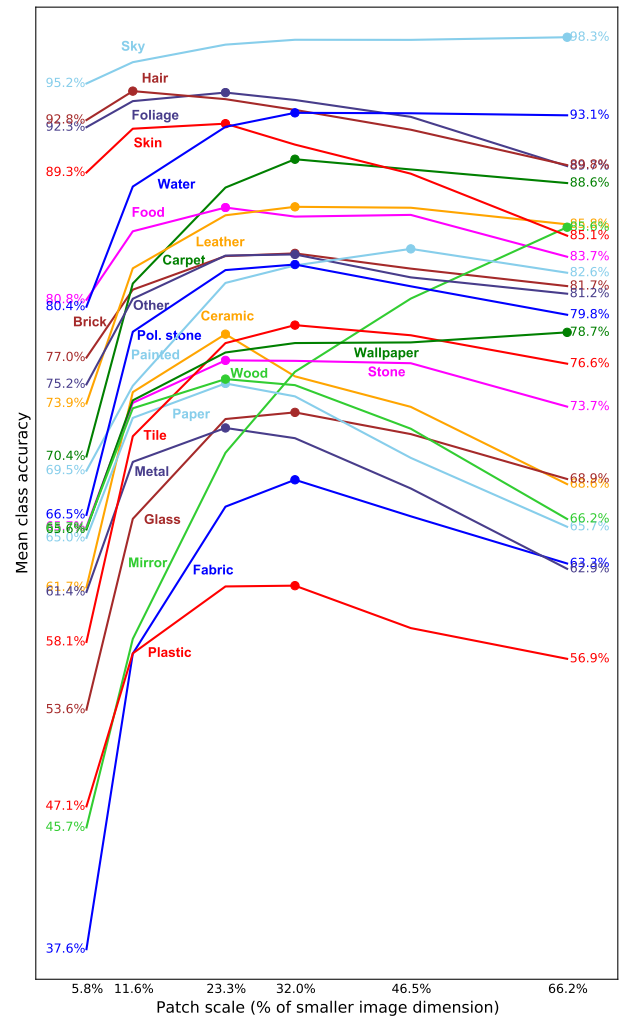

Figure 7: Patch accuracy with varying patch scale. Dots: peak accuracy for each category. CNN: AlexNet.

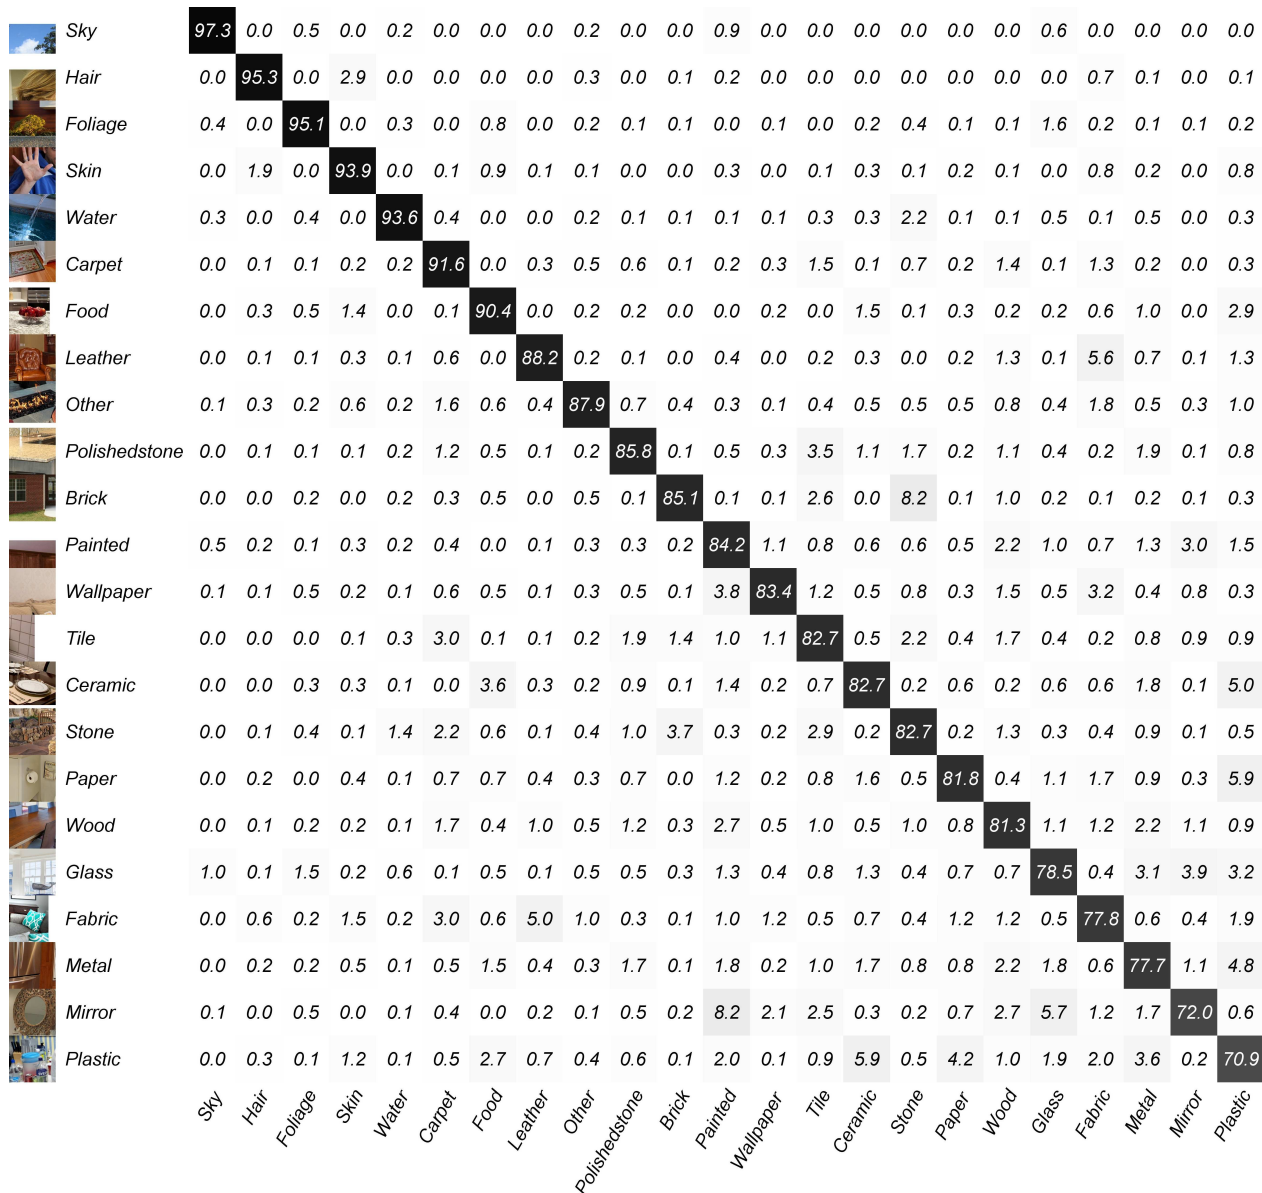

Figure 4: Confusion matrix for patch-based classification with GoogLeNet, trained with patch scale 23.3%. Rows are ground truth; columns are predictions. The mean class accuracy is 85.22% on test. The patch visualized to the left of each row is the patch in that category which is classified correctly with the highest confidence.



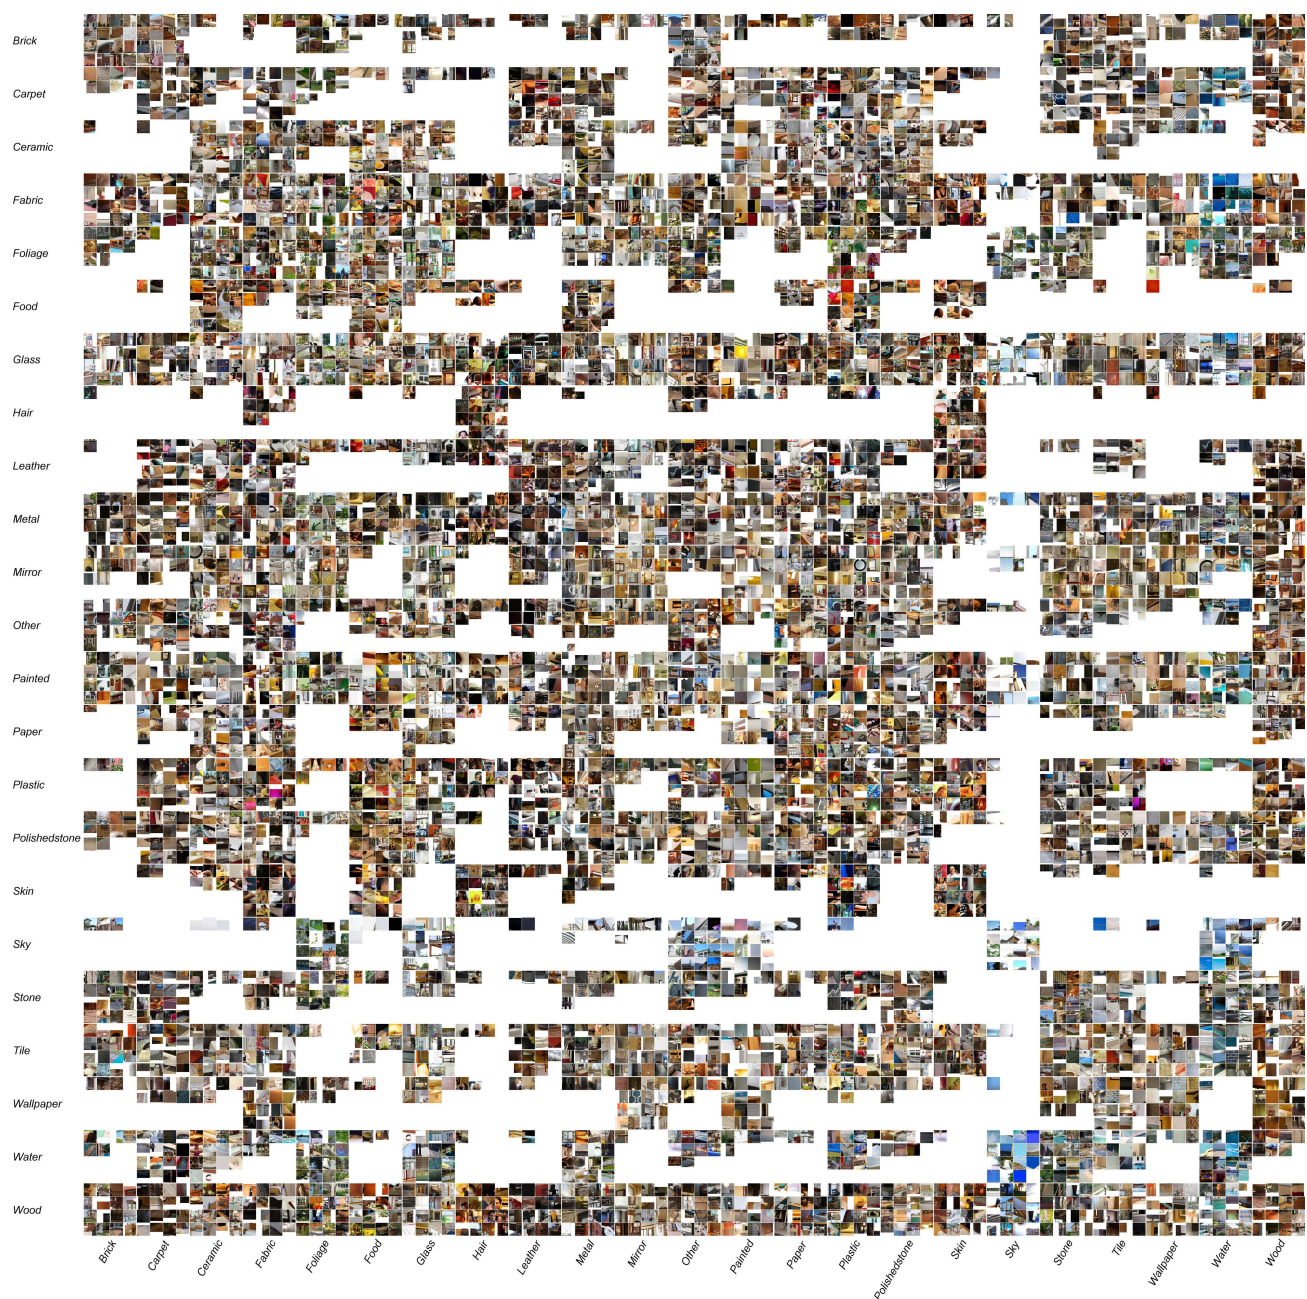

Figure 5: Visualization of the patch classification confusion matrix. Each cell of the confusion matrix has been visualized by 16 random patches. Rows are ground truth, columns are predicted labels. Test set patches were classified with GoogLeNet.

|          | Category       | # Samples by Source |        | # Samples by Type |         | Totals     |           |
|----------|----------------|---------------------|--------|-------------------|---------|------------|-----------|
|          |                | Houzz               | Flickr | Click             | Segment | # Segments | # Samples |
| Train    | Brick          | 48701               | 5146   | 49599             | 4248    | 365        | 53847     |
|          | Carpet         | 50080               | 33598  | 54684             | 28994   | 2041       | 83678     |
|          | Ceramic        | 12248               | 11234  | 16692             | 6790    | 1128       | 23482     |
|          | Fabric         | 215882              | 117965 | 248480            | 85367   | 9972       | 333847    |
|          | Foliage        | 97873               | 3930   | 101331            | 472     | 84         | 101803    |
|          | Food           | 8709                | 12572  | 12446             | 8835    | 1242       | 21281     |
|          | Glass          | 141230              | 40885  | 156409            | 25706   | 5395       | 182115    |
|          | Hair           | 4                   | 21730  | 19593             | 2141    | 301        | 21734     |
|          | Leather        | 63930               | 6453   | 65750             | 4633    | 572        | 70383     |
|          | Metal          | 101010              | 57688  | 121239            | 37459   | 5417       | 158698    |
|          | Mirror         | 60470               | 2682   | 60492             | 2660    | 317        | 63152     |
|          | Other          | 29404               | 4011   | 29431             | 3984    | 609        | 33415     |
|          | Painted        | 227367              | 164972 | 249464            | 142875  | 10326      | 392339    |
|          | Paper          | 11009               | 8951   | 15056             | 4904    | 1327       | 19960     |
|          | Plastic        | 1545                | 31303  | 25596             | 7252    | 1662       | 32848     |
|          | Polished stone | 81449               | 14778  | 83752             | 12475   | 1205       | 96227     |
|          | Skin           | 1                   | 29265  | 27459             | 1807    | 245        | 29266     |
|          | Sky            | 118704              | 63     | 117643            | 1124    | 54         | 118767    |
|          | Stone          | 17664               | 6919   | 18634             | 5949    | 523        | 24583     |
|          | Tile           | 76675               | 47177  | 83276             | 40576   | 3381       | 123852    |
|          | Wallpaper      | 7849                | 3820   | 7849              | 3820    | 253        | 11669     |
| Validate | Water          | 44546               | 617    | 43887             | 1276    | 69         | 45163     |
|          | Wood           | 345703              | 129393 | 368482            | 106614  | 13363      | 475096    |
|          | Brick          | 3532                | 360    | 3600              | 292     | 26         | 3892      |
|          | Carpet         | 3434                | 2062   | 3714              | 1782    | 137        | 5496      |
|          | Ceramic        | 809                 | 859    | 1180              | 488     | 90         | 1668      |
|          | Fabric         | 14923               | 8810   | 17311             | 6422    | 722        | 23733     |
|          | Foliage        | 7038                | 351    | 7177              | 212     | 26         | 7389      |
|          | Food           | 606                 | 952    | 853               | 705     | 84         | 1558      |
|          | Glass          | 9839                | 3153   | 11013             | 1979    | 413        | 12992     |
|          | Hair           | 2                   | 1561   | 1408              | 155     | 26         | 1563      |
|          | Leather        | 4627                | 466    | 4751              | 342     | 40         | 5093      |
|          | Metal          | 7145                | 4307   | 8649              | 2803    | 435        | 11452     |
|          | Mirror         | 4207                | 224    | 4210              | 221     | 26         | 4431      |
|          | Other          | 2125                | 206    | 2129              | 202     | 40         | 2331      |
|          | Painted        | 16123               | 11526  | 17749             | 9900    | 691        | 27649     |
|          | Paper          | 711                 | 663    | 1033              | 341     | 92         | 1374      |
|          | Plastic        | 109                 | 2153   | 1710              | 552     | 129        | 2262      |
|          | Polished stone | 5771                | 1046   | 5947              | 870     | 98         | 6817      |
|          | Skin           | 3                   | 2097   | 1912              | 188     | 27         | 2100      |
|          | Sky            | 8532                | 30     | 8087              | 475     | 26         | 8562      |
| Test     | Stone          | 1254                | 591    | 1331              | 514     | 50         | 1845      |
|          | Tile           | 5473                | 3635   | 6023              | 3085    | 245        | 9108      |
|          | Wallpaper      | 575                 | 321    | 576               | 320     | 28         | 896       |
|          | Water          | 3497                | 55     | 3031              | 521     | 26         | 3552      |
|          | Wood           | 24371               | 9661   | 26019             | 8013    | 937        | 34032     |
|          | Brick          | 5601                | 1114   | 5699              | 1016    | 80         | 6715      |
|          | Carpet         | 5506                | 4211   | 6085              | 3632    | 287        | 9717      |
|          | Ceramic        | 1352                | 1606   | 1874              | 1084    | 179        | 2958      |
|          | Fabric         | 24240               | 16162  | 28446             | 11956   | 1342       | 40402     |
|          | Foliage        | 11166               | 599    | 11404             | 361     | 78         | 11765     |
|          | Food           | 989                 | 1670   | 1463              | 1196    | 166        | 2659      |
|          | Glass          | 16046               | 5215   | 18063             | 3198    | 681        | 21261     |
|          | Hair           | 3                   | 2803   | 2231              | 575     | 86         | 2806      |
|          | Leather        | 7183                | 985    | 7437              | 731     | 83         | 8168      |
|          | Metal          | 11417               | 6924   | 13898             | 4443    | 644        | 18341     |
|          | Mirror         | 6819                | 682    | 6823              | 678     | 78         | 7501      |
|          | Other          | 3392                | 474    | 3400              | 466     | 78         | 3866      |
|          | Painted        | 25439               | 19649  | 28249             | 16839   | 1265       | 45088     |
|          | Paper          | 1276                | 1169   | 1746              | 699     | 176        | 2445      |
|          | Plastic        | 186                 | 3679   | 2832              | 1033    | 235        | 3865      |
|          | Polished stone | 9075                | 1966   | 9382              | 1659    | 143        | 11041     |
|          | Skin           | 3                   | 3877   | 3306              | 574     | 79         | 3880      |
|          | Sky            | 14522               | 299    | 13355             | 1466    | 78         | 14821     |
|          | Stone          | 2056                | 1132   | 2194              | 994     | 78         | 3188      |
|          | Tile           | 8741                | 5645   | 9546              | 4840    | 421        | 14386     |
|          | Wallpaper      | 907                 | 1482   | 907               | 1482    | 78         | 2389      |
|          | Water          | 6560                | 89     | 5021              | 1628    | 78         | 6649      |
|          | Wood           | 38467               | 17296  | 41455             | 14308   | 1709       | 55763     |

Table 1: Distribution of samples by photo source (columns 2 & 3) and type of annotation (columns 4 & 5), total count of segments (column 6) and total count of samples (column 7). Each sample is a patch center. Each segment produced 9 samples on average.

| CRF ID | $w_p$  | $\theta_p$ | $\theta_L$ | $\theta_{ab}$ |
|--------|--------|------------|------------|---------------|
| 1      | 5.000  | 0.100      | 20.000     | 5.000         |
| 2      | 7.500  | 0.050      | 20.000     | 5.000         |
| 3      | 5.000  | 0.200      | 20.000     | 5.000         |
| 4      | 10.000 | 0.050      | 20.000     | 5.000         |
| 5      | 6.000  | 0.189      | 15.365     | 4.726         |
| 6      | 7.000  | 0.189      | 15.365     | 4.726         |
| 7      | 0      | N/A        | N/A        | N/A           |
| 8      | 8.000  | 0.189      | 15.365     | 4.726         |
| 9      | 5.000  | 0.400      | 20.000     | 5.000         |
| 10     | 8.000  | 0.200      | 20.000     | 3.333         |
| 11     | 6.000  | 0.189      | 15.365     | 4.726         |
| 12     | 8.000  | 0.200      | 20.000     | 2.500         |
| 13     | 6.000  | 0.189      | 15.365     | 4.726         |
| 14     | 7.000  | 0.189      | 15.365     | 4.726         |
| 15     | 6.000  | 0.189      | 15.365     | 4.726         |
| 16     | 7.000  | 0.189      | 15.365     | 4.726         |
| 17     | 7.000  | 0.189      | 15.365     | 4.726         |
| 18     | 5.000  | 0.200      | 20.000     | 3.333         |
| 19     | 5.000  | 0.189      | 15.365     | 4.726         |
| 20     | 5.000  | 0.189      | 15.365     | 4.726         |
| 21     | 5.000  | 0.200      | 20.000     | 2.500         |
| 22     | 7.800  | 0.189      | 15.365     | 4.726         |
| 23     | 7.900  | 0.189      | 15.365     | 4.726         |
| 24     | 7.800  | 0.189      | 15.365     | 4.726         |
| 25     | 7.900  | 0.189      | 15.365     | 4.726         |
| 26     | 6.000  | 0.200      | 20.000     | 5.000         |
| 27     | 7.800  | 0.189      | 15.365     | 4.726         |
| 28     | 5.000  | 0.189      | 15.365     | 4.726         |
| 29     | 8.100  | 0.189      | 15.365     | 4.726         |
| 30     | 8.200  | 0.189      | 15.365     | 4.726         |
| 31     | 7.900  | 0.189      | 15.365     | 4.726         |
| 32     | 8.100  | 0.189      | 15.365     | 4.726         |
| 33     | 10.000 | 0.100      | 20.000     | 5.000         |
| 34     | 8.200  | 0.189      | 15.365     | 4.726         |
| 35     | 8.100  | 0.189      | 15.365     | 4.726         |
| 36     | 8.200  | 0.189      | 15.365     | 4.726         |
| 37     | 10.000 | 0.125      | 20.000     | 5.000         |
| 38     | 5.000  | 0.200      | 20.000     | 5.000         |
| 39     | 5.000  | 0.200      | 20.000     | 5.000         |
| 40     | 5.000  | 0.167      | 20.000     | 5.000         |
| 41     | 5.000  | 0.200      | 20.000     | 5.000         |
| 42     | 5.000  | 0.189      | 15.365     | 4.726         |
| 43     | 5.000  | 0.125      | 20.000     | 5.000         |
| 44     | 7.800  | 0.200      | 20.000     | 5.000         |
| 45     | 7.900  | 0.200      | 20.000     | 5.000         |
| 46     | 8.000  | 0.200      | 20.000     | 5.000         |
| 47     | 8.100  | 0.200      | 20.000     | 5.000         |
| 48     | 8.200  | 0.200      | 20.000     | 5.000         |
| 49     | 13.606 | 0.189      | 15.365     | 4.726         |
| 50     | 5.000  | 0.333      | 20.000     | 5.000         |

| CRF ID | $w_p$  | $\theta_p$ | $\theta_L$ | $\theta_{ab}$ |
|--------|--------|------------|------------|---------------|
| 51     | 10.000 | 0.189      | 15.365     | 4.726         |
| 52     | 4.000  | 0.189      | 15.365     | 4.726         |
| 53     | 5.000  | 0.100      | 20.000     | 5.000         |
| 54     | 10.000 | 0.167      | 20.000     | 5.000         |
| 55     | 4.000  | 0.189      | 15.365     | 4.726         |
| 56     | 5.000  | 0.200      | 20.000     | 10.000        |
| 57     | 5.000  | 0.400      | 20.000     | 5.000         |
| 58     | 12.000 | 0.200      | 20.000     | 5.000         |
| 59     | 4.000  | 0.189      | 15.365     | 4.726         |
| 60     | 10.000 | 0.200      | 20.000     | 5.000         |
| 61     | 8.000  | 0.200      | 20.000     | 10.000        |
| 62     | 3.000  | 0.189      | 15.365     | 4.726         |
| 63     | 3.000  | 0.200      | 20.000     | 5.000         |
| 64     | 3.000  | 0.189      | 15.365     | 4.726         |
| 65     | 9.000  | 0.189      | 15.365     | 4.726         |
| 66     | 3.000  | 0.189      | 15.365     | 4.726         |
| 67     | 5.000  | 1.000      | 20.000     | 5.000         |
| 68     | 2.500  | 0.200      | 20.000     | 5.000         |
| 69     | 8.000  | 0.200      | 20.000     | 20.000        |
| 70     | 2.000  | 0.200      | 10.000     | 5.000         |
| 71     | 2.000  | 0.200      | 20.000     | 2.500         |
| 72     | 2.000  | 0.200      | 20.000     | 3.333         |
| 73     | 2.000  | 0.189      | 15.365     | 4.726         |
| 74     | 2.000  | 0.189      | 15.365     | 4.726         |
| 75     | 10.000 | 0.333      | 20.000     | 5.000         |
| 76     | 2.000  | 0.200      | 20.000     | 5.000         |
| 77     | 2.000  | 0.189      | 15.365     | 4.726         |
| 78     | 2.000  | 0.189      | 15.365     | 4.726         |
| 79     | 2.000  | 0.200      | 40.000     | 5.000         |
| 80     | 2.000  | 0.100      | 20.000     | 5.000         |
| 81     | 2.000  | 0.200      | 20.000     | 10.000        |
| 82     | 2.000  | 0.400      | 20.000     | 5.000         |
| 83     | 1.500  | 0.200      | 20.000     | 5.000         |
| 84     | 1.000  | 0.189      | 15.365     | 4.726         |
| 85     | 2.000  | 0.189      | 15.365     | 4.726         |
| 86     | 3.000  | 0.189      | 15.365     | 4.726         |
| 87     | 4.000  | 0.189      | 15.365     | 4.726         |
| 88     | 5.000  | 0.189      | 15.365     | 4.726         |
| 89     | 6.000  | 0.189      | 15.365     | 4.726         |
| 90     | 7.000  | 0.189      | 15.365     | 4.726         |
| 91     | 7.800  | 0.189      | 15.365     | 4.726         |
| 92     | 7.900  | 0.189      | 15.365     | 4.726         |
| 93     | 8.100  | 0.189      | 15.365     | 4.726         |
| 94     | 8.200  | 0.189      | 15.365     | 4.726         |
| 95     | 1.000  | 0.189      | 15.365     | 4.726         |
| 96     | 1.000  | 0.200      | 20.000     | 5.000         |
| 97     | 1.000  | 0.189      | 15.365     | 4.726         |
| 98     | 1.000  | 0.189      | 15.365     | 4.726         |
| 99     | 10.000 | 0.400      | 20.000     | 5.000         |
| 100    | 10.000 | 1.000      | 20.000     | 5.000         |

Table 3: Parameter settings for our dense CRF; see Section 4.2 of the main paper for explanations of these parameters. The CRF IDs are renumbered so that better performing parameter values have a lower ID number. Table headers: CRF ID: unique identifier for this configuration (used in later table);  $w_p$ : pairwise weight (note that setting  $w_p = 0$  is equivalent to not using a CRF);  $\theta_p$ : position feature scale (dimensionless);  $\theta_L$ : color intensity feature scale (has units of  $L^*$  from the  $L^*a^*b^*$  colorspace);  $\theta_{ab}$ : color chromaticity feature scale (has units of  $a^*$  or  $b^*$  from the  $L^*a^*b^*$  colorspace); While we explored a more extensive set of parameter values on the validation set, this is the smaller smaller set of parameters for our final evaluation. This was necessary to keep runtimes manageable.



## 7. Material segmentation and recognition experiments

As mentioned in Section 5.2 of the main paper, we tried a variety of CNN configurations (listed in Table 4), as well as a variety of CRF parameter settings (Table 3). The final end-to-end segmentation and recognition system involves several decisions: which CNNs to combine, how to average them, and which CRF parameters to use. We enumerated a large number of combinations, listed in the table below. For each row, we measure accuracy across the entire validation set; these are not test accuracies. We report test accuracies in Table 4 of the main paper.

Note that the different measures of accuracy lead to very different rankings (entries within 1% of the max are highlighted in bold). This is illustrated visually in Figure 9 of the main paper.

Table 5: (*Below, multi-page*) Exhaustive list of CNN and CRF configurations, measured on the validation set, sorted by mean class accuracy across segments (first column). *Table headers:* S. Cls: mean class accuracy measured on segments (i.e. the pixels in each segment); S. Tot: total accuracy measured on segments (also known as “per-pixel accuracy”); C. Cls: mean class accuracy on click locations; C. Tot: total accuracy measured on click locations; CNNs: list of CNNs (each ID can be found in Table 4); Op: whether the different CNN predictions are averaged using a sum or a product (geometric average), CRF: the CRF parameter ID (each ID can be found in Table 3).

| S. Cls       | S. Tot       | C. Cls | C. Tot | CNNs       | Op. | CRF |
|--------------|--------------|--------|--------|------------|-----|-----|
| <b>74.2%</b> | <b>80.3%</b> | 77.4%  | 78.8%  | A4, G1     | +   | 1   |
| <b>74.2%</b> | 79.8%        | 75.9%  | 76.8%  | A5, G1     | +   | 1   |
| <b>74.2%</b> | 79.6%        | 78.1%  | 79.2%  | A4, G1     | +   | 2   |
| <b>74.2%</b> | <b>81.2%</b> | 77.6%  | 79.5%  | A4, G1     | ×   | 3   |
| <b>74.2%</b> | 79.3%        | 76.8%  | 77.7%  | A5, G1     | +   | 2   |
| <b>74.1%</b> | 79.7%        | 77.6%  | 78.8%  | A4, G1     | +   | 4   |
| <b>74.1%</b> | 79.4%        | 76.4%  | 77.2%  | A5, G1     | +   | 4   |
| <b>74.1%</b> | <b>81.2%</b> | 76.3%  | 78.5%  | A4, G1     | ×   | 5   |
| <b>74.0%</b> | <b>80.7%</b> | 76.5%  | 78.4%  | A4, G1     | +   | 3   |
| <b>74.0%</b> | 79.8%        | 78.6%  | 79.5%  | A2, A5, G1 | +   | 2   |
| <b>74.0%</b> | 79.9%        | 78.3%  | 79.0%  | A2, A5, G1 | +   | 4   |
| <b>74.0%</b> | <b>80.6%</b> | 78.1%  | 79.7%  | A4, G1     | ×   | 1   |
| <b>73.9%</b> | <b>80.5%</b> | 78.2%  | 79.1%  | A2, A5, G1 | +   | 1   |
| <b>73.9%</b> | <b>80.8%</b> | 79.0%  | 80.3%  | A2, A5, G1 | ×   | 1   |
| <b>73.9%</b> | 79.5%        | 77.4%  | 78.5%  | A5, G1     | ×   | 2   |
| <b>73.8%</b> | 79.3%        | 76.3%  | 77.5%  | A4, G3     | +   | 2   |
| <b>73.8%</b> | 79.6%        | 76.9%  | 78.0%  | A5, G1     | ×   | 4   |
| <b>73.8%</b> | <b>81.2%</b> | 77.2%  | 78.9%  | A2, A5, G1 | ×   | 5   |
| <b>73.8%</b> | 80.2%        | 77.0%  | 78.1%  | A5, G1     | ×   | 1   |
| <b>73.8%</b> | 79.3%        | 75.9%  | 77.1%  | A4, G3     | +   | 4   |
| <b>73.8%</b> | 79.9%        | 75.4%  | 76.9%  | A4, G3     | +   | 1   |
| <b>73.8%</b> | 80.2%        | 79.1%  | 80.2%  | A2, A5, G1 | ×   | 2   |
| <b>73.8%</b> | <b>80.7%</b> | 74.9%  | 77.0%  | A4, G1     | +   | 5   |
| <b>73.7%</b> | 80.2%        | 78.5%  | 79.6%  | A2, A5, G1 | ×   | 4   |

| CNN ID | Architecture                | Min dim. $d$ | # shifts |
|--------|-----------------------------|--------------|----------|
| A1     | AlexNet                     | 2200         | 2        |
| A2     | AlexNet                     | 1100         | 2        |
| A2b    | AlexNet                     | 1100         | 1        |
| A3     | AlexNet                     | 800          | 2        |
| A4     | AlexNet                     | 550          | 2        |
| A5     | AlexNet                     | 386          | 2        |
| G1     | GoogLeNet (no avg pooling)  | 1100         | 2        |
| G3     | GoogLeNet (3x3 avg pooling) | 1100         | 2        |
| G5     | GoogLeNet (5x5 avg pooling) | 1100         | 2        |
| G7     | GoogLeNet (7x7 avg pooling) | 1100         | 2        |

Table 4: (*Above*) Configurations of CNNs used for material segmentation and recognition. In all configurations, when there are multiple predictions from different scales or shifts or mirrors, the resulting outputs are averaged together (with arithmetic average). Table headers: CNN ID: unique identifier for this configuration (used in later table); Min dim: smaller dimension of the input photo (this scales the effective patch size, since each prediction has a fixed receptive field of  $227 \times 227$  pixels); # shifts: number of partial strides (# shifts = 1 corresponds to 32px strides, # shifts = 2 corresponds to 16px strides).

| S. Cls       | S. Tot       | C. Cls | C. Tot | CNNs       | Op. | CRF |
|--------------|--------------|--------|--------|------------|-----|-----|
| <b>73.7%</b> | <b>81.1%</b> | 78.7%  | 80.3%  | A2, A5, G1 | ×   | 3   |
| <b>73.7%</b> | <b>81.0%</b> | 74.7%  | 77.0%  | A4, G1     | ×   | 6   |
| <b>73.7%</b> | 79.8%        | 78.2%  | 79.6%  | A4, G1     | ×   | 2   |
| <b>73.7%</b> | 79.1%        | 73.9%  | 75.0%  | A5, G3     | +   | 1   |
| <b>73.6%</b> | 79.8%        | 74.9%  | 76.3%  | A5, G1     | +   | 3   |
| <b>73.6%</b> | <b>80.6%</b> | 79.6%  | 81.0%  | A2, A4, G1 | ×   | 1   |
| <b>73.6%</b> | 79.9%        | 77.7%  | 79.2%  | A4, G1     | ×   | 4   |
| <b>73.6%</b> | <b>81.1%</b> | 79.2%  | 81.0%  | A2, A4, G1 | ×   | 3   |
| <b>73.6%</b> | <b>80.2%</b> | 74.4%  | 76.4%  | A4, G3     | +   | 3   |
| <b>73.6%</b> | <b>80.4%</b> | 75.0%  | 76.6%  | A5, G1     | ×   | 5   |
| <b>73.6%</b> | <b>80.3%</b> | 78.9%  | 80.2%  | A2, A4, G1 | +   | 1   |
| <b>73.6%</b> | <b>80.4%</b> | 76.4%  | 78.0%  | A5, G1     | ×   | 3   |
| <b>73.6%</b> | 79.6%        | 78.9%  | 79.9%  | A2, A4, G1 | +   | 2   |
| <b>73.5%</b> | <b>80.4%</b> | 75.4%  | 77.1%  | A2, A5, G1 | +   | 5   |
| <b>73.5%</b> | 79.8%        | 73.0%  | 74.6%  | A5, G1     | +   | 5   |
| <b>73.5%</b> | 79.7%        | 78.4%  | 79.4%  | A2, A4, G1 | +   | 4   |
| <b>73.5%</b> | <b>80.4%</b> | 77.3%  | 78.7%  | A2, A5, G1 | +   | 3   |
| <b>73.5%</b> | <b>80.3%</b> | 72.8%  | 75.1%  | A4, G3     | +   | 5   |
| <b>73.5%</b> | <b>81.0%</b> | 77.7%  | 79.7%  | A2, A4, G1 | ×   | 5   |
| <b>73.4%</b> | 78.6%        | 75.0%  | 75.9%  | A5, G3     | +   | 2   |
| <b>73.4%</b> | <b>80.9%</b> | 75.6%  | 77.4%  | A2, A5, G1 | ×   | 6   |
| <b>73.4%</b> | 78.7%        | 74.6%  | 75.5%  | A5, G3     | +   | 4   |
| <b>73.4%</b> | 79.9%        | 79.2%  | 80.6%  | A2, A4, G1 | ×   | 2   |
| <b>73.4%</b> | 79.8%        | 76.3%  | 77.6%  | A4, G3     | ×   | 1   |

| S. Cls | S. Tot | C. Cls | C. Tot | CNNs           | Op. | CRF |
|--------|--------|--------|--------|----------------|-----|-----|
| 73.4%  | 80.0%  | 78.6%  | 80.0%  | A2, A4, G1     | ×   | 4   |
| 73.4%  | 80.7%  | 78.0%  | 79.8%  | A2, A4, G1     | +   | 3   |
| 73.3%  | 80.5%  | 73.0%  | 75.3%  | A4, G1         | +   | 6   |
| 73.3%  | 79.4%  | 76.1%  | 77.5%  | A4, G3         | ×   | 4   |
| 73.3%  | 80.5%  | 74.3%  | 76.4%  | A4, G3         | ×   | 5   |
| 73.3%  | 79.3%  | 76.5%  | 77.9%  | A4, G3         | ×   | 2   |
| 73.3%  | 76.3%  | 86.2%  | 83.9%  | A2, A5, G1     | ×   | 7   |
| 73.3%  | 75.6%  | 86.1%  | 83.6%  | A2, A5, G1     | +   | 7   |
| 73.3%  | 80.2%  | 73.1%  | 75.1%  | A5, G1         | ×   | 6   |
| 73.2%  | 79.4%  | 78.6%  | 80.2%  | A3, G1         | +   | 2   |
| 73.2%  | 80.4%  | 75.5%  | 77.4%  | A4, G3         | ×   | 3   |
| 73.2%  | 80.8%  | 73.0%  | 75.5%  | A4, G1         | ×   | 8   |
| 73.2%  | 80.9%  | 78.7%  | 81.1%  | A3, G1         | ×   | 3   |
| 73.2%  | 80.7%  | 76.4%  | 78.3%  | A2, A4, G1     | +   | 5   |
| 73.2%  | 78.7%  | 75.4%  | 76.3%  | A5, G3         | ×   | 2   |
| 73.2%  | 80.9%  | 77.3%  | 79.7%  | A4, G1         | ×   | 9   |
| 73.2%  | 80.8%  | 78.0%  | 80.4%  | A3, G1         | +   | 3   |
| 73.2%  | 80.9%  | 77.5%  | 80.0%  | A3, G1         | ×   | 5   |
| 73.2%  | 78.8%  | 75.0%  | 76.0%  | A5, G3         | ×   | 4   |
| 73.2%  | 79.4%  | 78.1%  | 79.7%  | A3, G1         | +   | 4   |
| 73.1%  | 79.0%  | 77.3%  | 78.8%  | A3, G3         | +   | 2   |
| 73.1%  | 79.5%  | 71.2%  | 72.8%  | A5, G1         | +   | 6   |
| 73.1%  | 79.4%  | 72.7%  | 74.3%  | A5, G3         | +   | 3   |
| 73.1%  | 78.8%  | 72.3%  | 73.8%  | A4, G5         | +   | 1   |
| 73.1%  | 78.3%  | 73.8%  | 75.0%  | A4, G5         | +   | 2   |
| 73.1%  | 79.2%  | 74.3%  | 75.6%  | A5, G3         | ×   | 1   |
| 73.1%  | 78.4%  | 73.6%  | 74.7%  | A4, G5         | +   | 4   |
| 73.1%  | 79.1%  | 76.8%  | 78.2%  | A3, G3         | +   | 4   |
| 73.0%  | 79.7%  | 78.4%  | 80.1%  | A3, G1         | ×   | 4   |
| 73.0%  | 79.6%  | 78.9%  | 80.6%  | A3, G1         | ×   | 2   |
| 73.0%  | 80.7%  | 76.3%  | 78.3%  | A2, A4, G1     | ×   | 6   |
| 73.0%  | 80.1%  | 71.2%  | 73.7%  | A4, G3         | +   | 6   |
| 73.0%  | 80.3%  | 79.2%  | 81.1%  | A3, G1         | ×   | 1   |
| 73.0%  | 80.8%  | 76.6%  | 79.0%  | A3, G1         | +   | 5   |
| 73.0%  | 80.1%  | 73.4%  | 75.2%  | A2, A5, G1     | +   | 6   |
| 73.0%  | 79.3%  | 71.0%  | 72.8%  | A5, G3         | +   | 5   |
| 72.9%  | 78.5%  | 75.1%  | 75.7%  | A2, A5, G7     | +   | 2   |
| 72.9%  | 78.7%  | 76.5%  | 77.2%  | A2, A3, A5, G7 | +   | 2   |
| 72.9%  | 80.4%  | 75.9%  | 78.0%  | A5, G1         | ×   | 9   |
| 72.9%  | 80.7%  | 74.0%  | 76.0%  | A2, A5, G1     | ×   | 8   |
| 72.9%  | 79.9%  | 79.4%  | 81.3%  | A2, G1         | +   | 1   |
| 72.9%  | 80.4%  | 76.0%  | 78.5%  | A4, G1         | +   | 9   |
| 72.9%  | 80.7%  | 76.0%  | 78.6%  | A3, G1         | ×   | 6   |
| 72.9%  | 79.3%  | 77.1%  | 78.7%  | A3, G3         | ×   | 4   |
| 72.9%  | 75.5%  | 84.3%  | 81.2%  | A2, A4, A5, G7 | +   | 7   |
| 72.9%  | 80.1%  | 78.6%  | 80.4%  | A3, G1         | +   | 1   |
| 72.9%  | 78.5%  | 74.6%  | 75.4%  | A2, A5, G7     | +   | 4   |
| 72.9%  | 80.0%  | 71.4%  | 73.7%  | A5, G1         | ×   | 8   |
| 72.9%  | 80.4%  | 76.1%  | 78.5%  | A3, G3         | +   | 3   |
| 72.9%  | 78.4%  | 76.1%  | 76.4%  | A2, A4, A5, G7 | +   | 2   |
| 72.9%  | 75.3%  | 84.3%  | 81.8%  | A5, G1         | ×   | 7   |
| 72.9%  | 79.2%  | 77.6%  | 79.2%  | A3, G3         | ×   | 2   |
| 72.8%  | 80.2%  | 79.8%  | 82.0%  | A2, G1         | ×   | 1   |
| 72.8%  | 78.7%  | 76.1%  | 76.8%  | A2, A3, A5, G7 | +   | 4   |
| 72.8%  | 80.2%  | 71.2%  | 73.6%  | A4, G1         | +   | 8   |
| 72.8%  | 80.5%  | 79.0%  | 81.4%  | A2, G1         | +   | 3   |
| 72.8%  | 75.6%  | 83.9%  | 81.0%  | A2, A5, G7     | +   | 7   |
| 72.8%  | 79.1%  | 75.4%  | 76.0%  | A2, A3, A5, G7 | +   | 1   |
| 72.8%  | 78.4%  | 75.7%  | 76.0%  | A2, A4, A5, G7 | +   | 4   |

| S. Cls | S. Tot | C. Cls | C. Tot | CNNs                   | Op. | CRF |
|--------|--------|--------|--------|------------------------|-----|-----|
| 72.8%  | 80.3%  | 72.5%  | 74.8%  | A4, G3                 | ×   | 6   |
| 72.8%  | 79.0%  | 77.5%  | 78.2%  | A1, A2, A5, G7         | +   | 2   |
| 72.7%  | 75.3%  | 85.8%  | 83.7%  | A2, A4, G1             | +   | 7   |
| 72.7%  | 80.4%  | 77.1%  | 79.4%  | A3, G3                 | ×   | 3   |
| 72.7%  | 74.8%  | 84.5%  | 82.5%  | A4, G1                 | +   | 7   |
| 72.7%  | 80.7%  | 79.7%  | 82.2%  | A2, G1                 | ×   | 3   |
| 72.7%  | 75.9%  | 85.9%  | 83.2%  | A1, A2, A3, A4, A5, G7 | +   | 7   |
| 72.7%  | 78.8%  | 74.6%  | 75.2%  | A2, A4, A5, G7         | +   | 1   |
| 72.7%  | 76.5%  | 85.7%  | 83.4%  | A1, A2, A3, A4, A5, G7 | ×   | 7   |
| 72.7%  | 80.6%  | 78.3%  | 80.8%  | A2, G1                 | ×   | 5   |
| 72.7%  | 75.4%  | 84.8%  | 82.7%  | A4, G1                 | ×   | 7   |
| 72.7%  | 79.3%  | 69.5%  | 71.4%  | A5, G1                 | +   | 8   |
| 72.7%  | 80.4%  | 74.5%  | 76.6%  | A2, A4, G1             | +   | 6   |
| 72.7%  | 78.7%  | 75.9%  | 76.7%  | A2, A4, G7             | +   | 2   |
| 72.7%  | 79.5%  | 74.2%  | 76.1%  | A5, G1                 | +   | 9   |
| 72.7%  | 80.4%  | 77.3%  | 79.9%  | A2, G1                 | +   | 5   |
| 72.7%  | 75.8%  | 86.0%  | 84.0%  | A2, A4, G1             | ×   | 7   |
| 72.7%  | 80.4%  | 75.6%  | 78.1%  | A3, G3                 | ×   | 5   |
| 72.7%  | 79.7%  | 76.7%  | 78.6%  | A3, G3                 | +   | 1   |
| 72.7%  | 80.6%  | 77.4%  | 80.3%  | A3, G1                 | +   | 9   |
| 72.7%  | 80.6%  | 78.8%  | 81.0%  | A2, A4, G1             | ×   | 9   |
| 72.7%  | 78.7%  | 75.5%  | 76.3%  | A2, A4, G7             | +   | 4   |
| 72.7%  | 78.8%  | 76.4%  | 77.0%  | A2, A4, A5, G7         | ×   | 2   |
| 72.7%  | 75.9%  | 83.6%  | 81.0%  | A2, A4, A5, G7         | ×   | 7   |
| 72.7%  | 74.4%  | 83.8%  | 81.3%  | A5, G1                 | +   | 7   |
| 72.6%  | 79.6%  | 72.3%  | 74.2%  | A5, G3                 | ×   | 5   |
| 72.6%  | 79.0%  | 76.9%  | 77.6%  | A1, A2, A5, G7         | +   | 4   |
| 72.6%  | 78.8%  | 77.7%  | 78.2%  | A1, A2, A3, A4, A5, G7 | +   | 2   |
| 72.6%  | 79.5%  | 74.0%  | 75.6%  | A5, G3                 | ×   | 3   |
| 72.6%  | 80.1%  | 79.7%  | 81.5%  | A2, A3, G1             | ×   | 1   |
| 72.6%  | 79.9%  | 69.7%  | 72.2%  | A4, G3                 | +   | 8   |
| 72.6%  | 79.3%  | 79.4%  | 80.9%  | A2, A3, G1             | ×   | 2   |
| 72.6%  | 78.7%  | 77.0%  | 77.7%  | A2, A3, A4, G7         | +   | 2   |
| 72.6%  | 80.6%  | 74.8%  | 77.4%  | A3, G1                 | +   | 6   |
| 72.6%  | 78.8%  | 76.0%  | 76.6%  | A2, A4, A5, G7         | ×   | 4   |
| 72.6%  | 80.3%  | 74.6%  | 77.1%  | A3, G3                 | +   | 5   |
| 72.6%  | 80.2%  | 75.2%  | 77.5%  | A4, G3                 | ×   | 9   |
| 72.6%  | 80.5%  | 78.4%  | 80.4%  | A2, A5, G1             | ×   | 9   |
| 72.6%  | 78.9%  | 79.1%  | 80.3%  | A2, A3, G1             | +   | 2   |
| 72.6%  | 76.2%  | 86.1%  | 83.5%  | A1, A2, A5, G7         | +   | 7   |
| 72.6%  | 79.4%  | 78.8%  | 80.3%  | A2, A3, G1             | ×   | 4   |
| 72.6%  | 80.0%  | 74.0%  | 76.4%  | A4, G3                 | +   | 9   |
| 72.6%  | 80.7%  | 78.5%  | 81.2%  | A3, G1                 | ×   | 9   |
| 72.6%  | 79.1%  | 74.4%  | 75.4%  | A2, A4, G7             | +   | 1   |
| 72.6%  | 75.6%  | 84.7%  | 81.8%  | A2, A3, A5, G7         | +   | 7   |
| 72.6%  | 80.5%  | 74.8%  | 76.9%  | A2, A4, G1             | ×   | 8   |
| 72.6%  | 80.5%  | 79.6%  | 81.7%  | A2, A3, G1             | ×   | 3   |
| 72.6%  | 78.8%  | 77.2%  | 77.7%  | A1, A2, A3, A4, A5, G7 | +   | 4   |
| 72.6%  | 79.6%  | 77.4%  | 79.5%  | A2, G3                 | +   | 1   |
| 72.6%  | 80.2%  | 78.8%  | 80.8%  | A2, A3, G1             | +   | 3   |
| 72.6%  | 78.9%  | 78.6%  | 79.8%  | A2, A3, G1             | +   | 4   |
| 72.6%  | 78.9%  | 76.7%  | 77.6%  | A2, A3, A5, G7         | ×   | 2   |
| 72.5%  | 78.7%  | 76.6%  | 77.3%  | A2, A3, A4, G7         | +   | 4   |
| 72.5%  | 79.7%  | 79.2%  | 80.7%  | A2, A3, G1             | +   | 1   |
| 72.5%  | 79.7%  | 77.3%  | 79.2%  | A3, G3                 | ×   | 1   |
| 72.5%  | 80.5%  | 74.4%  | 77.2%  | A3, G1                 | ×   | 8   |
| 72.5%  | 79.4%  | 78.7%  | 80.7%  | A2, G1                 | ×   | 4   |
| 72.5%  | 79.0%  | 69.2%  | 71.2%  | A5, G3                 | +   | 6   |
| 72.5%  | 79.8%  | 71.6%  | 73.5%  | A2, A5, G1             | +   | 8   |

| S. Cls | S. Tot       | C. Cls       | C. Tot       | CNNs                   | Op. | CRF |
|--------|--------------|--------------|--------------|------------------------|-----|-----|
| 72.5%  | 77.9%        | 70.5%        | 71.7%        | A5, G5                 | +   | 1   |
| 72.5%  | 76.7%        | <b>86.0%</b> | <b>83.9%</b> | A1, A2, A5, G7         | ×   | 7   |
| 72.5%  | 79.3%        | 76.9%        | 77.5%        | A1, A2, A3, A4, A5, G7 | +   | 1   |
| 72.5%  | 79.3%        | 79.2%        | 81.2%        | A2, G1                 | ×   | 2   |
| 72.5%  | 80.0%        | 76.9%        | 79.5%        | A2, G3                 | +   | 3   |
| 72.5%  | 78.9%        | 76.4%        | 77.3%        | A2, A3, A5, G7         | ×   | 4   |
| 72.5%  | 79.1%        | 70.9%        | 73.0%        | A4, G5                 | +   | 3   |
| 72.5%  | 76.0%        | 84.4%        | 81.7%        | A2, A3, A5, G7         | ×   | 7   |
| 72.5%  | 78.9%        | 73.3%        | 74.4%        | A2, A5, G7             | +   | 1   |
| 72.4%  | 79.1%        | 75.5%        | 76.3%        | A2, A4, A5, G7         | ×   | 1   |
| 72.4%  | 80.1%        | 75.6%        | 78.4%        | A2, G1                 | +   | 6   |
| 72.4%  | 79.7%        | 78.1%        | 80.2%        | A2, G3                 | ×   | 1   |
| 72.4%  | 79.3%        | 76.4%        | 77.3%        | A1, A2, A5, G7         | +   | 1   |
| 72.4%  | 78.3%        | 73.9%        | 75.2%        | A4, G5                 | ×   | 4   |
| 72.4%  | 75.5%        | 84.1%        | 81.6%        | A2, A4, G7             | +   | 7   |
| 72.4%  | 78.9%        | 77.0%        | 78.0%        | A2, A3, A4, G7         | ×   | 2   |
| 72.4%  | 79.2%        | 78.2%        | 79.0%        | A1, A2, A3, A4, A5, G7 | ×   | 2   |
| 72.4%  | <b>80.4%</b> | 76.7%        | 79.5%        | A2, G1                 | ×   | 6   |
| 72.4%  | <b>80.3%</b> | 74.3%        | 76.8%        | A3, G3                 | ×   | 6   |
| 72.4%  | 75.9%        | 83.2%        | 80.9%        | A2, A5, G7             | ×   | 7   |
| 72.4%  | 74.7%        | 82.9%        | 80.7%        | A4, G3                 | +   | 7   |
| 72.4%  | 78.2%        | 74.2%        | 75.5%        | A4, G5                 | ×   | 2   |
| 72.4%  | 78.9%        | 79.0%        | 80.9%        | A2, G1                 | +   | 2   |
| 72.4%  | 77.3%        | 72.1%        | 73.0%        | A5, G5                 | +   | 4   |
| 72.4%  | 79.7%        | 78.2%        | 78.9%        | A1, A2, A3, A4, A5, G7 | ×   | 1   |
| 72.4%  | 80.1%        | 71.0%        | 73.5%        | A4, G3                 | ×   | 8   |
| 72.4%  | 77.2%        | 72.4%        | 73.2%        | A5, G5                 | +   | 2   |
| 72.4%  | 79.2%        | 76.6%        | 77.7%        | A2, A3, A4, G7         | ×   | 1   |
| 72.4%  | 79.3%        | 76.2%        | 77.0%        | A2, A3, A5, G7         | ×   | 1   |
| 72.4%  | 79.0%        | 76.5%        | 77.6%        | A2, A3, A4, G7         | ×   | 4   |
| 72.3%  | 79.2%        | 77.7%        | 78.5%        | A1, A2, A3, A4, A5, G7 | ×   | 4   |
| 72.3%  | 79.0%        | 78.5%        | 80.2%        | A2, G1                 | +   | 4   |
| 72.3%  | 79.4%        | 70.5%        | 72.6%        | A5, G3                 | ×   | 6   |
| 72.3%  | 79.9%        | 76.6%        | 78.5%        | A2, A5, G1             | +   | 9   |
| 72.3%  | 80.2%        | 78.1%        | 80.5%        | A2, G3                 | ×   | 3   |
| 72.3%  | 79.1%        | 69.4%        | 71.8%        | A4, G5                 | +   | 5   |
| 72.3%  | 75.1%        | 83.1%        | 81.0%        | A4, G3                 | ×   | 7   |
| 72.3%  | 80.2%        | 78.1%        | 80.3%        | A2, A3, G1             | ×   | 5   |
| 72.3%  | 78.8%        | 78.0%        | 78.8%        | A1, A2, A3, A4, G7     | +   | 2   |
| 72.3%  | 78.7%        | 77.7%        | 79.5%        | A2, G3                 | +   | 2   |
| 72.3%  | 78.8%        | 76.2%        | 77.4%        | A2, A4, G7             | ×   | 2   |
| 72.3%  | 78.9%        | 75.8%        | 77.1%        | A2, A4, G7             | ×   | 4   |
| 72.3%  | <b>80.2%</b> | 76.6%        | 79.3%        | A2, G3                 | ×   | 5   |
| 72.3%  | 80.0%        | 77.3%        | 79.4%        | A2, A3, G1             | +   | 5   |
| 72.2%  | 79.9%        | 75.5%        | 78.1%        | A2, G3                 | +   | 5   |
| 72.2%  | 80.1%        | 72.8%        | 75.0%        | A2, A4, G1             | +   | 8   |
| 72.2%  | 78.6%        | 72.9%        | 73.9%        | A2, A4, A5, G7         | +   | 3   |
| 72.2%  | 79.3%        | 71.1%        | 74.9%        | G1                     | +   | 10  |
| 72.2%  | 80.0%        | 77.5%        | 79.7%        | A2, A4, G1             | +   | 9   |
| 72.2%  | 79.2%        | 73.8%        | 77.2%        | G1                     | +   | 5   |
| 72.2%  | 79.2%        | 73.8%        | 77.2%        | G1                     | +   | 11  |
| 72.2%  | 79.0%        | 73.7%        | 75.0%        | A2, A3, A5, G7         | +   | 3   |
| 72.2%  | 78.7%        | 77.2%        | 78.9%        | A2, G3                 | +   | 4   |
| 72.2%  | 78.2%        | 74.5%        | 76.1%        | A3, G5                 | +   | 4   |
| 72.2%  | 80.0%        | 73.0%        | 75.7%        | A3, G3                 | +   | 6   |
| 72.2%  | 78.1%        | 74.9%        | 76.5%        | A3, G5                 | +   | 2   |
| 72.2%  | 79.4%        | 72.0%        | 75.5%        | G1                     | +   | 12  |
| 72.2%  | 78.9%        | 78.4%        | 80.1%        | A2, G3                 | ×   | 2   |
| 72.2%  | 79.0%        | 77.9%        | 79.5%        | A2, G3                 | ×   | 4   |

| S. Cls | S. Tot       | C. Cls       | C. Tot       | CNNs               | Op. | CRF |
|--------|--------------|--------------|--------------|--------------------|-----|-----|
| 72.2%  | 78.8%        | 73.5%        | 75.6%        | A3, G5             | +   | 1   |
| 72.2%  | 78.9%        | 75.8%        | 76.7%        | A2, A3, A4, G7     | +   | 1   |
| 72.2%  | <b>80.3%</b> | 72.8%        | 75.8%        | A3, G1             | +   | 8   |
| 72.2%  | 78.7%        | 77.5%        | 78.3%        | A1, A2, A3, A4, G7 | +   | 4   |
| 72.2%  | 75.3%        | 84.4%        | 82.0%        | A2, A3, A4, G7     | +   | 7   |
| 72.2%  | <b>80.3%</b> | 76.9%        | 79.5%        | A3, G3             | ×   | 9   |
| 72.2%  | 79.1%        | 73.9%        | 77.3%        | G1                 | +   | 13  |
| 72.2%  | 79.1%        | 71.7%        | 73.8%        | A5, G3             | +   | 9   |
| 72.2%  | 78.7%        | 75.5%        | 76.6%        | A2, A5, G7         | ×   | 2   |
| 72.1%  | 79.4%        | 78.3%        | 79.2%        | A1, A2, A5, G7     | ×   | 2   |
| 72.1%  | 75.6%        | 84.1%        | 81.9%        | A2, A3, A4, G7     | ×   | 7   |
| 72.1%  | 74.7%        | 82.2%        | 79.7%        | A5, G3             | ×   | 7   |
| 72.1%  | 78.7%        | 75.2%        | 76.2%        | A2, A5, G7         | ×   | 4   |
| 72.1%  | 75.8%        | 83.4%        | 81.4%        | A2, A4, G7         | ×   | 7   |
| 72.1%  | 74.0%        | 81.8%        | 79.3%        | A5, G3             | +   | 7   |
| 72.1%  | 75.6%        | <b>86.0%</b> | <b>83.5%</b> | A1, A2, A3, A4, G7 | +   | 7   |
| 72.1%  | 78.7%        | 71.6%        | 72.8%        | A2, A4, A5, G7     | +   | 5   |
| 72.1%  | 79.3%        | 72.4%        | 76.1%        | G1                 | +   | 6   |
| 72.1%  | 79.3%        | 72.4%        | 76.1%        | G1                 | +   | 14  |
| 72.1%  | 80.1%        | 75.6%        | 78.4%        | A3, G3             | +   | 9   |
| 72.1%  | 78.6%        | 73.0%        | 74.5%        | A4, G5             | ×   | 1   |
| 72.1%  | 79.0%        | 74.5%        | 77.8%        | G1                 | +   | 15  |
| 72.1%  | <b>80.2%</b> | 79.2%        | 82.2%        | A2, G1             | ×   | 9   |
| 72.1%  | 79.2%        | 73.3%        | 76.8%        | G1                 | +   | 16  |
| 72.1%  | 79.2%        | 74.3%        | 75.8%        | A2, A3, A4, G7     | +   | 3   |
| 72.1%  | 79.3%        | 77.7%        | 78.7%        | A1, A2, A5, G7     | ×   | 4   |
| 72.1%  | 80.1%        | 79.3%        | 81.8%        | A2, A3, G1         | ×   | 9   |
| 72.1%  | 79.3%        | 72.5%        | 76.1%        | G1                 | +   | 17  |
| 72.1%  | 79.1%        | 74.5%        | 75.5%        | A2, A4, A5, G7     | ×   | 3   |
| 72.1%  | 78.0%        | 71.1%        | 72.4%        | A5, G5             | ×   | 1   |
| 72.0%  | 80.2%        | 75.1%        | 78.1%        | A2, G1             | ×   | 8   |
| 72.0%  | 78.8%        | 67.9%        | 70.0%        | A5, G3             | +   | 8   |
| 72.0%  | 79.9%        | 74.0%        | 76.8%        | A2, G1             | +   | 8   |
| 72.0%  | 78.8%        | 75.4%        | 78.5%        | G1                 | +   | 18  |
| 72.0%  | 79.3%        | 75.6%        | 76.9%        | A2, A4, G7         | ×   | 1   |
| 72.0%  | 79.1%        | 74.7%        | 75.8%        | A2, A5, G7         | ×   | 1   |
| 72.0%  | 80.1%        | 72.7%        | 75.5%        | A3, G3             | ×   | 8   |
| 72.0%  | 79.7%        | 78.4%        | 80.7%        | A2, A3, G1         | +   | 9   |
| 72.0%  | 79.1%        | 72.8%        | 74.4%        | A2, A4, G7         | +   | 3   |
| 72.0%  | 78.5%        | 79.1%        | 79.4%        | A1, A2, A5         | +   | 1   |
| 72.0%  | 77.5%        | 72.4%        | 73.3%        | A5, G5             | ×   | 4   |
| 72.0%  | 77.8%        | 77.0%        | 76.8%        | A2, A5             | +   | 1   |
| 72.0%  | 78.7%        | 75.1%        | 78.3%        | G1                 | +   | 19  |
| 72.0%  | 78.7%        | 75.1%        | 78.3%        | G1                 | +   | 20  |
| 72.0%  | 78.7%        | 75.7%        | 78.7%        | G1                 | +   | 21  |
| 72.0%  | 79.2%        | 72.2%        | 75.9%        | G1                 | +   | 22  |
| 72.0%  | 80.1%        | 75.3%        | 77.9%        | A2, G3             | ×   | 6   |
| 72.0%  | 76.0%        | <b>86.0%</b> | <b>83.8%</b> | A1, A2, A3, A4, G7 | ×   | 7   |
| 72.0%  | 79.8%        | 78.1%        | 79.1%        | A1, A2, A5, G7     | ×   | 1   |
| 72.0%  | 77.4%        | 72.7%        | 73.6%        | A5, G5             | ×   | 2   |
| 72.0%  | 79.2%        | 72.0%        | 75.8%        | G1                 | +   | 23  |
| 72.0%  | 78.3%        | 77.5%        | 77.7%        | A2, A5             | ×   | 1   |
| 72.0%  | 79.3%        | 71.2%        | 75.0%        | G1                 | +   | 24  |
| 71.9%  | 78.2%        | 67.5%        | 69.5%        | A5, G5             | +   | 5   |
| 71.9%  | 79.3%        | 71.0%        | 74.9%        | G1                 | +   | 25  |
| 71.9%  | 79.0%        | 73.3%        | 76.8%        | G1                 | +   | 26  |
| 71.9%  | 79.2%        | 71.3%        | 75.1%        | G1                 | +   | 27  |
| 71.9%  | 78.7%        | 75.1%        | 78.3%        | G1                 | +   | 28  |
| 71.9%  | 78.4%        | 75.1%        | 76.7%        | A3, G5             | ×   | 4   |

| S. Cls | S. Tot | C. Cls | C. Tot       | CNNs                   | Op. | CRF |
|--------|--------|--------|--------------|------------------------|-----|-----|
| 71.9%  | 79.2%  | 71.7%  | 75.5%        | G1                     | +   | 29  |
| 71.9%  | 79.9%  | 76.7%  | 78.9%        | A2, A3, G1             | ×   | 6   |
| 71.9%  | 79.2%  | 70.9%  | 74.8%        | G1                     | +   | 8   |
| 71.9%  | 79.2%  | 71.6%  | 75.4%        | G1                     | +   | 30  |
| 71.9%  | 79.2%  | 71.1%  | 75.0%        | G1                     | +   | 31  |
| 71.9%  | 79.1%  | 77.3%  | 78.3%        | A1, A2, A3, A4, G7     | +   | 1   |
| 71.9%  | 79.2%  | 69.4%  | 71.6%        | A5, G3                 | ×   | 8   |
| 71.9%  | 79.2%  | 70.8%  | 74.7%        | G1                     | +   | 32  |
| 71.9%  | 74.8%  | 85.2%  | <b>83.6%</b> | A3, G1                 | ×   | 7   |
| 71.9%  | 79.5%  | 74.6%  | 76.2%        | A2, A4, G7             | ×   | 3   |
| 71.9%  | 78.2%  | 77.6%  | 77.6%        | A2, A3, A5             | +   | 1   |
| 71.9%  | 78.8%  | 71.5%  | 74.5%        | G1                     | +   | 33  |
| 71.9%  | 79.9%  | 78.3%  | 81.3%        | A2, G1                 | +   | 9   |
| 71.9%  | 79.2%  | 70.7%  | 74.6%        | G1                     | +   | 34  |
| 71.9%  | 78.0%  | 68.9%  | 70.6%        | A5, G5                 | +   | 3   |
| 71.9%  | 79.2%  | 70.9%  | 74.7%        | G1                     | +   | 35  |
| 71.9%  | 77.5%  | 69.0%  | 70.7%        | A4, G7                 | +   | 1   |
| 71.9%  | 79.0%  | 72.2%  | 73.7%        | A2, A3, A5, G7         | +   | 5   |
| 71.8%  | 79.2%  | 70.7%  | 74.6%        | G1                     | +   | 36  |
| 71.8%  | 79.7%  | 73.8%  | 76.5%        | A2, G3                 | +   | 6   |
| 71.8%  | 80.0%  | 77.7%  | 80.6%        | A2, G3                 | ×   | 9   |
| 71.8%  | 79.5%  | 75.8%  | 77.2%        | A2, A3, A4, G7         | ×   | 3   |
| 71.8%  | 79.0%  | 70.2%  | 73.6%        | G1                     | +   | 37  |
| 71.8%  | 79.5%  | 73.3%  | 75.3%        | A5, G3                 | ×   | 9   |
| 71.8%  | 78.2%  | 75.5%  | 77.1%        | A3, G5                 | ×   | 2   |
| 71.8%  | 77.5%  | 76.3%  | 76.7%        | A2, A4, A5             | +   | 1   |
| 71.8%  | 79.0%  | 73.5%  | 75.1%        | A2, A5, G7             | ×   | 3   |
| 71.8%  | 78.6%  | 71.8%  | 73.2%        | A2, A5, G7             | +   | 3   |
| 71.8%  | 74.3%  | 85.1%  | <b>83.3%</b> | A3, G1                 | +   | 7   |
| 71.8%  | 78.5%  | 78.3%  | 78.5%        | A1, A2, A3, A4, A5     | +   | 1   |
| 71.8%  | 79.7%  | 75.5%  | 77.7%        | A2, A3, G1             | +   | 6   |
| 71.8%  | 77.0%  | 71.1%  | 72.4%        | A4, G7                 | +   | 4   |
| 71.8%  | 78.6%  | 74.9%  | 78.2%        | G1                     | +   | 3   |
| 71.8%  | 78.6%  | 74.9%  | 78.2%        | G1                     | +   | 38  |
| 71.8%  | 78.6%  | 74.9%  | 78.2%        | G1                     | +   | 39  |
| 71.8%  | 79.1%  | 75.5%  | 76.6%        | A1, A2, A3, A4, A5, G7 | +   | 3   |
| 71.8%  | 77.0%  | 71.3%  | 72.7%        | A4, G7                 | +   | 2   |
| 71.8%  | 78.5%  | 75.0%  | 78.1%        | G1                     | +   | 40  |
| 71.8%  | 79.1%  | 72.8%  | 74.6%        | A2, A3, A4, G7         | +   | 5   |
| 71.8%  | 79.0%  | 73.0%  | 74.3%        | A2, A4, A5, G7         | ×   | 5   |
| 71.8%  | 78.6%  | 74.8%  | 77.9%        | G1                     | +   | 41  |
| 71.8%  | 78.7%  | 74.4%  | 76.5%        | A2, G5                 | +   | 1   |
| 71.8%  | 77.2%  | 77.5%  | 77.2%        | A2, A5                 | +   | 2   |
| 71.8%  | 78.2%  | 77.9%  | 78.2%        | A2, A4                 | +   | 1   |
| 71.8%  | 79.1%  | 78.4%  | 79.4%        | A1, A2, A3, A4, G7     | ×   | 2   |
| 71.8%  | 78.9%  | 67.9%  | 70.4%        | A4, G5                 | +   | 6   |
| 71.8%  | 79.1%  | 71.4%  | 73.2%        | A2, A4, G7             | +   | 5   |
| 71.7%  | 78.5%  | 75.6%  | 78.7%        | G1                     | +   | 42  |
| 71.7%  | 74.4%  | 83.8%  | 81.8%        | A3, G3                 | +   | 7   |
| 71.7%  | 74.8%  | 83.8%  | 82.0%        | A3, G3                 | ×   | 7   |
| 71.7%  | 74.4%  | 85.5%  | <b>83.6%</b> | A2, A3, G1             | +   | 7   |
| 71.7%  | 79.6%  | 77.5%  | 78.5%        | A1, A2, A3, A4, A5, G7 | ×   | 3   |
| 71.7%  | 79.5%  | 73.1%  | 75.0%        | A2, A4, G7             | ×   | 5   |
| 71.7%  | 78.2%  | 75.0%  | 77.8%        | G1                     | +   | 43  |
| 71.7%  | 79.0%  | 79.3%  | 79.7%        | A1, A2, A3, A4, A5     | ×   | 1   |
| 71.7%  | 79.0%  | 70.6%  | 74.4%        | G1                     | +   | 44  |
| 71.7%  | 77.2%  | 77.0%  | 76.6%        | A2, A5                 | +   | 4   |
| 71.7%  | 78.5%  | 77.3%  | 78.0%        | A2, A4                 | +   | 3   |
| 71.7%  | 78.4%  | 69.6%  | 71.1%        | A2, A4, A5, G7         | +   | 6   |

| S. Cls | S. Tot | C. Cls | C. Tot       | CNNs                   | Op. | CRF |
|--------|--------|--------|--------------|------------------------|-----|-----|
| 71.7%  | 79.7%  | 71.2%  | 74.2%        | A3, G3                 | +   | 8   |
| 71.7%  | 78.8%  | 74.7%  | 76.6%        | A3, G5                 | ×   | 1   |
| 71.7%  | 79.9%  | 73.8%  | 76.5%        | A2, G3                 | ×   | 8   |
| 71.7%  | 79.0%  | 70.4%  | 74.2%        | G1                     | +   | 45  |
| 71.7%  | 74.7%  | 85.7%  | <b>83.9%</b> | A2, A3, G1             | ×   | 7   |
| 71.7%  | 79.1%  | 72.1%  | 73.8%        | A2, A5, G7             | ×   | 5   |
| 71.6%  | 79.1%  | 77.8%  | 78.8%        | A1, A2, A3, A4, G7     | ×   | 4   |
| 71.6%  | 79.0%  | 70.2%  | 74.1%        | G1                     | +   | 46  |
| 71.6%  | 79.3%  | 74.3%  | 75.9%        | A2, A3, A4, G7         | ×   | 5   |
| 71.6%  | 79.7%  | 76.6%  | 79.4%        | A2, G3                 | +   | 9   |
| 71.6%  | 79.0%  | 70.1%  | 73.9%        | G1                     | +   | 47  |
| 71.6%  | 78.6%  | 70.2%  | 72.0%        | A2, A5, G7             | +   | 5   |
| 71.6%  | 74.1%  | 80.7%  | 78.2%        | A4, G5                 | +   | 7   |
| 71.6%  | 79.6%  | 78.5%  | 79.7%        | A1, A2, A3, A4, G7     | ×   | 1   |
| 71.6%  | 78.5%  | 77.9%  | 78.2%        | A2, A3, A5             | ×   | 1   |
| 71.6%  | 78.9%  | 70.1%  | 72.6%        | A4, G5                 | +   | 9   |
| 71.6%  | 79.0%  | 69.9%  | 73.8%        | G1                     | +   | 48  |
| 71.6%  | 78.7%  | 77.7%  | 78.6%        | A2, A4                 | ×   | 3   |
| 71.6%  | 77.8%  | 78.4%  | 78.4%        | A1, A2, A3, A4, A5     | +   | 2   |
| 71.6%  | 78.4%  | 75.6%  | 76.6%        | A2, A4                 | +   | 5   |
| 71.6%  | 79.7%  | 66.8%  | 70.0%        | A4, G1                 | ×   | 49  |
| 71.6%  | 74.9%  | 84.3%  | 82.1%        | A2, A3, G7             | +   | 7   |
| 71.5%  | 74.5%  | 80.9%  | 78.6%        | A4, G5                 | ×   | 7   |
| 71.5%  | 78.4%  | 79.2%  | 79.8%        | A1, A2, A3, A4         | +   | 1   |
| 71.5%  | 78.7%  | 71.8%  | 73.9%        | A4, G5                 | ×   | 3   |
| 71.5%  | 77.6%  | 77.9%  | 77.7%        | A2, A5                 | ×   | 2   |
| 71.5%  | 78.5%  | 77.3%  | 78.1%        | A2, A3, A4             | +   | 3   |
| 71.5%  | 79.3%  | 75.8%  | 77.4%        | A1, A2, A3, A4, G7     | +   | 3   |
| 71.5%  | 79.4%  | 75.8%  | 77.2%        | A1, A2, A3, A4, A5, G7 | ×   | 5   |
| 71.5%  | 79.7%  | 75.2%  | 77.6%        | A2, A3, G1             | ×   | 8   |
| 71.5%  | 79.2%  | 73.9%  | 76.3%        | A3, G5                 | ×   | 3   |
| 71.5%  | 78.2%  | 76.1%  | 77.4%        | A2, A3, G7             | +   | 2   |
| 71.5%  | 79.0%  | 72.6%  | 75.1%        | A3, G5                 | +   | 3   |
| 71.5%  | 79.3%  | 72.8%  | 75.3%        | A3, G5                 | ×   | 5   |
| 71.5%  | 78.4%  | 75.8%  | 77.6%        | A2, G5                 | ×   | 4   |
| 71.5%  | 78.1%  | 77.7%  | 78.2%        | A2, A3, A4             | +   | 1   |
| 71.5%  | 78.7%  | 76.2%  | 77.4%        | A2, A4                 | ×   | 5   |
| 71.5%  | 79.1%  | 71.3%  | 73.9%        | A3, G5                 | +   | 5   |
| 71.5%  | 79.5%  | 80.9%  | 82.9%        | A1, A2, G1             | ×   | 1   |
| 71.5%  | 77.9%  | 66.1%  | 68.3%        | A5, G5                 | +   | 6   |
| 71.5%  | 79.4%  | 74.2%  | 76.7%        | A2, G5                 | ×   | 5   |
| 71.5%  | 78.5%  | 76.7%  | 77.3%        | A2, A5                 | ×   | 3   |
| 71.5%  | 78.8%  | 70.6%  | 72.7%        | A4, G5                 | ×   | 5   |
| 71.5%  | 79.3%  | 75.5%  | 78.0%        | A2, G5                 | ×   | 3   |
| 71.5%  | 77.7%  | 77.8%  | 77.8%        | A1, A2, A3, A4, A5     | +   | 4   |
| 71.5%  | 77.6%  | 77.3%  | 77.2%        | A2, A5                 | ×   | 4   |
| 71.5%  | 78.3%  | 76.4%  | 78.1%        | A2, G5                 | ×   | 2   |
| 71.4%  | 73.8%  | 85.0%  | 81.3%        | A2, A5                 | +   | 7   |
| 71.4%  | 78.6%  | 74.7%  | 78.1%        | G1                     | +   | 50  |
| 71.4%  | 78.3%  | 68.4%  | 70.5%        | A5, G5                 | ×   | 5   |
| 71.4%  | 78.2%  | 75.7%  | 76.9%        | A2, A3, G7             | +   | 4   |
| 71.4%  | 77.3%  | 77.8%  | 77.6%        | A2, A3, A5             | +   | 2   |
| 71.4%  | 79.0%  | 68.6%  | 72.6%        | G1                     | +   | 51  |
| 71.4%  | 77.9%  | 77.0%  | 76.9%        | A2, A4, A5             | ×   | 1   |
| 71.4%  | 78.5%  | 76.5%  | 77.9%        | A2, A3, G7             | ×   | 2   |
| 71.4%  | 78.9%  | 73.6%  | 76.3%        | A2, G5                 | +   | 3   |
| 71.4%  | 77.9%  | 76.0%  | 76.3%        | A2, A5                 | +   | 3   |
| 71.4%  | 79.4%  | 72.3%  | 75.2%        | A2, G3                 | +   | 8   |
| 71.4%  | 75.2%  | 83.7%  | 81.9%        | A2, A3, G7             | ×   | 7   |



| S. Cls | S. Tot | C. Cls       | C. Tot       | CNNs                   | Op. | CRF |
|--------|--------|--------------|--------------|------------------------|-----|-----|
| 71.4%  | 78.6%  | 76.1%        | 77.5%        | A2, A3, G7             | ×   | 4   |
| 71.4%  | 78.3%  | 78.2%        | 78.7%        | A2, A4                 | ×   | 1   |
| 71.4%  | 79.2%  | 80.2%        | 82.0%        | A1, A2, G1             | +   | 1   |
| 71.4%  | 79.8%  | 80.4%        | 82.8%        | A1, A2, G1             | ×   | 3   |
| 71.4%  | 79.7%  | 78.0%        | 79.4%        | A1, A2, A3, A4, G7     | ×   | 3   |
| 71.4%  | 73.7%  | 84.4%        | 80.8%        | A2, A4, A5             | +   | 7   |
| 71.4%  | 74.3%  | <b>85.9%</b> | 82.8%        | A1, A2, A3, A4, A5     | +   | 7   |
| 71.4%  | 79.2%  | 75.2%        | 76.5%        | A2, A3, A5, G7         | ×   | 3   |
| 71.4%  | 77.4%  | 77.2%        | 77.1%        | A2, A3, A5             | +   | 4   |
| 71.4%  | 78.9%  | 73.6%        | 75.0%        | A1, A2, A3, A4, A5, G7 | +   | 5   |
| 71.4%  | 77.9%  | 75.4%        | 77.2%        | A2, G5                 | +   | 2   |
| 71.4%  | 78.9%  | 72.2%        | 75.0%        | A2, G5                 | +   | 5   |
| 71.3%  | 78.4%  | 78.0%        | 79.2%        | A1, A2, A3, G7         | +   | 2   |
| 71.3%  | 74.2%  | 82.0%        | 80.0%        | A3, G5                 | +   | 7   |
| 71.3%  | 79.4%  | 73.7%        | 76.2%        | A2, A3, G1             | +   | 8   |
| 71.3%  | 79.1%  | 80.0%        | 80.8%        | A1, A2, A5             | ×   | 1   |
| 71.3%  | 78.6%  | 66.6%        | 69.3%        | A4, G5                 | +   | 8   |
| 71.3%  | 77.3%  | 71.6%        | 72.9%        | A4, G7                 | ×   | 4   |
| 71.3%  | 78.9%  | 75.9%        | 77.9%        | A2, G5                 | ×   | 1   |
| 71.3%  | 78.6%  | 70.3%        | 72.0%        | A2, A3, A5, G7         | +   | 6   |
| 71.3%  | 77.9%  | 78.9%        | 79.0%        | A1, A2, A5             | +   | 2   |
| 71.3%  | 78.0%  | 74.9%        | 76.7%        | A2, G5                 | +   | 4   |
| 71.3%  | 78.1%  | 69.6%        | 71.6%        | A5, G5                 | ×   | 3   |
| 71.3%  | 74.6%  | 82.1%        | 80.3%        | A3, G5                 | ×   | 7   |
| 71.3%  | 74.9%  | <b>85.7%</b> | <b>83.0%</b> | A1, A2, A3, A4, A5     | ×   | 7   |
| 71.3%  | 76.8%  | 77.2%        | 76.6%        | A2, A4, A5             | +   | 2   |
| 71.3%  | 78.3%  | 76.7%        | 77.2%        | A2, A3, A5             | +   | 3   |
| 71.3%  | 77.8%  | 76.2%        | 79.1%        | G1                     | +   | 52  |
| 71.3%  | 79.0%  | 74.6%        | 76.1%        | A1, A2, A5, G7         | +   | 3   |
| 71.3%  | 77.7%  | 75.0%        | 77.8%        | G1                     | +   | 1   |
| 71.3%  | 77.7%  | 75.0%        | 77.8%        | G1                     | +   | 53  |
| 71.3%  | 78.2%  | 79.1%        | 79.3%        | A1, A2, A3, A4, A5     | ×   | 2   |
| 71.3%  | 77.2%  | 71.8%        | 73.1%        | A4, G7                 | ×   | 2   |
| 71.3%  | 77.8%  | 74.4%        | 74.8%        | A2, A5                 | +   | 5   |
| 71.3%  | 78.6%  | 77.5%        | 78.5%        | A2, A3, A4             | ×   | 3   |
| 71.3%  | 78.7%  | 71.2%        | 72.7%        | A2, A4, A5, G7         | ×   | 6   |
| 71.3%  | 78.5%  | 77.3%        | 78.5%        | A1, A2, A3, G7         | +   | 4   |
| 71.3%  | 78.3%  | 79.7%        | 81.5%        | A1, A2, G1             | +   | 2   |
| 71.3%  | 78.9%  | 76.0%        | 77.6%        | A2, A3, G7             | ×   | 1   |
| 71.3%  | 78.6%  | 75.0%        | 76.5%        | A2, A3, G7             | +   | 1   |
| 71.3%  | 79.4%  | 79.5%        | 81.8%        | A1, A2, G1             | +   | 3   |
| 71.2%  | 79.7%  | 79.2%        | 81.6%        | A1, A2, G1             | ×   | 5   |
| 71.2%  | 78.4%  | 75.4%        | 76.0%        | A2, A5                 | ×   | 5   |
| 71.2%  | 74.2%  | 84.8%        | 81.3%        | A2, A5                 | ×   | 7   |
| 71.2%  | 78.9%  | 68.5%        | 72.4%        | G1                     | +   | 54  |
| 71.2%  | 77.8%  | 76.2%        | 79.1%        | G1                     | +   | 55  |
| 71.2%  | 76.8%  | 76.7%        | 76.1%        | A2, A4, A5             | +   | 4   |
| 71.2%  | 78.4%  | 75.7%        | 76.8%        | A2, A3, A4             | +   | 5   |
| 71.2%  | 78.7%  | 77.3%        | 77.9%        | A2, A3, A5             | ×   | 3   |
| 71.2%  | 78.1%  | 68.1%        | 69.7%        | A2, A4, A5, G7         | +   | 8   |
| 71.2%  | 78.3%  | 79.0%        | 80.7%        | A1, A2, G1             | +   | 4   |
| 71.2%  | 79.7%  | 77.4%        | 78.7%        | A1, A2, A5, G7         | ×   | 3   |
| 71.2%  | 78.4%  | 64.1%        | 66.7%        | A5, G1                 | +   | 49  |
| 71.2%  | 77.2%  | 77.4%        | 77.1%        | A2, A4, A5             | ×   | 2   |
| 71.2%  | 79.0%  | 65.8%        | 68.8%        | A5, G1                 | ×   | 49  |
| 71.2%  | 79.2%  | 71.6%        | 73.5%        | A2, A4, G7             | ×   | 6   |
| 71.2%  | 78.7%  | 69.4%        | 71.5%        | A2, A4, G7             | +   | 6   |
| 71.2%  | 78.2%  | 78.4%        | 78.6%        | A1, A2, A3, A4, A5     | ×   | 4   |
| 71.2%  | 77.8%  | 78.3%        | 78.3%        | A1, A2, A5             | +   | 4   |

| S. Cls | S. Tot | C. Cls | C. Tot       | CNNs               | Op. | CRF |
|--------|--------|--------|--------------|--------------------|-----|-----|
| 71.2%  | 78.1%  | 74.2%  | 77.5%        | G1                 | +   | 56  |
| 71.2%  | 74.1%  | 84.1%  | 80.7%        | A2, A4, A5         | ×   | 7   |
| 71.2%  | 78.8%  | 70.8%  | 72.9%        | A2, A3, A4, G7     | +   | 6   |
| 71.2%  | 79.1%  | 65.2%  | 68.4%        | A4, G1             | +   | 49  |
| 71.2%  | 77.2%  | 77.9%  | 78.1%        | A2, A3, A4         | +   | 2   |
| 71.2%  | 78.2%  | 75.1%  | 75.7%        | A2, A3, A5         | +   | 5   |
| 71.2%  | 79.2%  | 72.5%  | 75.1%        | A2, G5             | ×   | 6   |
| 71.2%  | 78.9%  | 70.4%  | 72.3%        | A2, A5, G7         | ×   | 6   |
| 71.2%  | 78.7%  | 77.2%  | 78.5%        | A1, A2, A3, G7     | +   | 1   |
| 71.2%  | 79.2%  | 80.3%  | 82.8%        | A1, G1             | ×   | 1   |
| 71.2%  | 77.1%  | 78.1%  | 78.1%        | A2, A4             | +   | 2   |
| 71.2%  | 78.5%  | 77.4%  | 78.0%        | A1, A2, A3, A4, A5 | +   | 3   |
| 71.2%  | 77.2%  | 76.9%  | 76.7%        | A2, A4, A5         | ×   | 4   |
| 71.2%  | 79.0%  | 72.6%  | 74.4%        | A1, A2, A5, G7     | +   | 5   |
| 71.1%  | 77.6%  | 70.2%  | 71.9%        | A4, G7             | ×   | 1   |
| 71.1%  | 79.1%  | 71.1%  | 73.7%        | A3, G5             | ×   | 6   |
| 71.1%  | 75.0%  | 85.5%  | <b>83.6%</b> | A1, A2, A3, G7     | +   | 7   |
| 71.1%  | 79.5%  | 76.3%  | 78.0%        | A1, A2, A3, A4, G7 | ×   | 5   |
| 71.1%  | 79.0%  | 72.6%  | 74.5%        | A2, A3, A4, G7     | ×   | 6   |
| 71.1%  | 77.2%  | 77.4%  | 77.6%        | A2, A3, A4         | +   | 4   |
| 71.1%  | 78.5%  | 78.2%  | 79.4%        | A1, A2, A3, A4     | +   | 3   |
| 71.1%  | 77.5%  | 79.0%  | 79.3%        | A1, A2, A3, A4     | +   | 2   |
| 71.1%  | 78.3%  | 74.5%  | 78.1%        | G1                 | +   | 9   |
| 71.1%  | 78.3%  | 74.6%  | 78.1%        | G1                 | +   | 57  |
| 71.1%  | 78.8%  | 79.8%  | 82.0%        | A1, G1             | +   | 1   |
| 71.1%  | 79.5%  | 67.3%  | 70.4%        | A2, A5, G1         | ×   | 49  |
| 71.1%  | 79.1%  | 74.0%  | 75.8%        | A1, A2, A3, A4, G7 | +   | 5   |
| 71.1%  | 77.6%  | 75.6%  | 75.7%        | A2, A4, A5         | +   | 3   |
| 71.1%  | 78.2%  | 78.0%  | 78.5%        | A2, A3, A4         | ×   | 1   |
| 71.1%  | 78.2%  | 78.5%  | 79.8%        | A2, A3             | ×   | 3   |
| 71.1%  | 79.6%  | 75.5%  | 77.2%        | A1, A2, A5, G7     | ×   | 5   |
| 71.1%  | 78.1%  | 78.3%  | 79.6%        | A2, A3             | +   | 3   |
| 71.1%  | 77.0%  | 74.3%  | 76.9%        | G1                 | +   | 4   |
| 71.1%  | 77.5%  | 78.0%  | 78.1%        | A2, A3, A5         | ×   | 2   |
| 71.1%  | 76.4%  | 67.1%  | 68.5%        | A5, G7             | +   | 1   |
| 71.1%  | 79.2%  | 75.3%  | 77.3%        | A2, A3, G7         | ×   | 3   |
| 71.1%  | 78.3%  | 68.4%  | 70.4%        | A2, A5, G7         | +   | 6   |
| 71.1%  | 77.1%  | 77.4%  | 77.4%        | A2, A4             | +   | 4   |
| 71.1%  | 77.5%  | 78.3%  | 78.6%        | A1, A2, A3, A4     | +   | 4   |
| 71.1%  | 79.3%  | 77.9%  | 80.3%        | A1, A2, G1         | +   | 5   |
| 71.1%  | 79.4%  | 66.5%  | 69.5%        | A4, G1             | ×   | 58  |
| 71.1%  | 78.5%  | 80.1%  | 82.1%        | A1, A2, G1         | ×   | 2   |
| 71.0%  | 77.6%  | 65.0%  | 67.2%        | A5, G5             | +   | 8   |
| 71.0%  | 79.1%  | 78.3%  | 79.2%        | A1, A2, A3, A4, A5 | ×   | 3   |
| 71.0%  | 78.2%  | 77.1%  | 78.6%        | A2, A3             | ×   | 5   |
| 71.0%  | 79.2%  | 78.8%  | 81.6%        | A1, G1             | +   | 3   |
| 71.0%  | 78.1%  | 73.8%  | 75.1%        | A2, A4             | +   | 6   |
| 71.0%  | 78.6%  | 69.0%  | 71.4%        | A4, G5             | ×   | 6   |
| 71.0%  | 78.1%  | 67.0%  | 69.2%        | A5, G5             | ×   | 6   |
| 71.0%  | 73.1%  | 78.6%  | 75.9%        | A5, G5             | +   | 7   |
| 71.0%  | 77.5%  | 77.4%  | 77.5%        | A2, A3, A5         | ×   | 4   |
| 71.0%  | 78.3%  | 79.6%  | 80.0%        | A1, A2, A5         | ×   | 2   |
| 71.0%  | 77.9%  | 70.4%  | 72.5%        | A3, G7             | +   | 1   |
| 71.0%  | 78.8%  | 69.6%  | 72.5%        | A3, G5             | +   | 6   |
| 71.0%  | 78.4%  | 76.1%  | 77.3%        | A2, A3, A4         | ×   | 5   |
| 71.0%  | 77.5%  | 76.3%  | 79.4%        | G1                 | +   | 59  |
| 71.0%  | 79.1%  | 73.7%  | 75.3%        | A2, A3, A5, G7     | ×   | 5   |
| 71.0%  | 78.6%  | 76.0%  | 76.7%        | A2, A3, A5         | ×   | 5   |
| 71.0%  | 77.2%  | 78.3%  | 78.5%        | A2, A4             | ×   | 2   |

| S. Cls | S. Tot | C. Cls       | C. Tot       | CNNs                   | Op. | CRF |
|--------|--------|--------------|--------------|------------------------|-----|-----|
| 71.0%  | 78.6%  | 79.5%        | 81.4%        | A1, A2, G1             | ×   | 4   |
| 71.0%  | 79.2%  | 78.6%        | 80.0%        | A1, A2, A3, G7         | ×   | 1   |
| 71.0%  | 73.7%  | 79.2%        | 76.5%        | A5, G5                 | ×   | 7   |
| 71.0%  | 78.4%  | 74.5%        | 75.8%        | A2, A4                 | ×   | 6   |
| 71.0%  | 75.3%  | 85.4%        | <b>83.6%</b> | A1, A2, A3, G7         | ×   | 7   |
| 71.0%  | 73.7%  | 84.9%        | 81.6%        | A2, A3, A5             | +   | 7   |
| 71.0%  | 79.0%  | 73.9%        | 75.5%        | A1, A2, A3, A4, A5, G7 | ×   | 6   |
| 71.0%  | 78.0%  | 76.9%        | 78.3%        | A2, A3                 | +   | 5   |
| 71.0%  | 78.4%  | 77.9%        | 78.8%        | A1, A2, A5             | +   | 3   |
| 71.0%  | 78.6%  | 78.6%        | 79.9%        | A1, A2, A3, G7         | ×   | 2   |
| 71.0%  | 78.6%  | 67.5%        | 71.6%        | G1                     | +   | 60  |
| 71.0%  | 79.3%  | 73.9%        | 76.0%        | A2, A3, G7             | ×   | 5   |
| 71.0%  | 78.5%  | 79.6%        | 80.6%        | A1, A2, A3, A4         | ×   | 1   |
| 71.0%  | 77.5%  | 67.1%        | 69.3%        | A4, G7                 | +   | 3   |
| 70.9%  | 73.7%  | 83.9%        | 82.2%        | A2, G3                 | +   | 7   |
| 70.9%  | 78.8%  | 65.1%        | 68.1%        | A2, A5, G1             | +   | 49  |
| 70.9%  | 74.1%  | 84.7%        | 81.5%        | A2, A3, A5             | ×   | 7   |
| 70.9%  | 78.3%  | 76.6%        | 78.0%        | A1, A2, A3, A4         | +   | 5   |
| 70.9%  | 78.8%  | 64.3%        | 67.4%        | A4, G3                 | +   | 49  |
| 70.9%  | 78.2%  | 76.2%        | 76.6%        | A2, A4, A5             | ×   | 3   |
| 70.9%  | 78.3%  | 78.9%        | 79.3%        | A1, A2, A5             | ×   | 4   |
| 70.9%  | 77.8%  | 72.8%        | 74.6%        | A3, G7                 | ×   | 4   |
| 70.9%  | 78.6%  | 73.8%        | 75.3%        | A2, A4, A5, G7         | ×   | 9   |
| 70.9%  | 77.2%  | 77.7%        | 77.8%        | A2, A4                 | ×   | 4   |
| 70.9%  | 78.7%  | 77.7%        | 80.1%        | A1, G3                 | +   | 1   |
| 70.9%  | 74.2%  | 84.1%        | 82.6%        | A2, G3                 | ×   | 7   |
| 70.9%  | 78.7%  | 77.9%        | 79.2%        | A1, A2, A3, G7         | ×   | 4   |
| 70.9%  | 77.3%  | 72.0%        | 73.7%        | A3, G7                 | +   | 4   |
| 70.9%  | 77.7%  | 73.1%        | 74.9%        | A3, G7                 | ×   | 2   |
| 70.9%  | 77.1%  | 78.0%        | 78.4%        | A2, A3, A4             | ×   | 2   |
| 70.9%  | 78.9%  | 77.0%        | 78.0%        | A1, A2, A3, A4, A5     | ×   | 5   |
| 70.9%  | 74.9%  | <b>86.7%</b> | <b>83.8%</b> | A1, A2, A5             | ×   | 7   |
| 70.9%  | 78.1%  | 78.8%        | 80.9%        | A1, G1                 | +   | 2   |
| 70.9%  | 79.1%  | 77.2%        | 80.3%        | A1, G1                 | +   | 5   |
| 70.9%  | 79.2%  | 79.1%        | 80.2%        | A1, A2, A5             | ×   | 3   |
| 70.9%  | 79.4%  | 77.6%        | 80.2%        | A1, A2, G1             | ×   | 6   |
| 70.9%  | 75.6%  | 69.4%        | 70.2%        | A5, G7                 | +   | 4   |
| 70.9%  | 75.5%  | 69.5%        | 70.3%        | A5, G7                 | +   | 2   |
| 70.9%  | 78.4%  | 69.6%        | 71.3%        | A2, A4, A5, G7         | ×   | 8   |
| 70.9%  | 73.9%  | 85.1%        | <b>83.6%</b> | A2, G1                 | ×   | 7   |
| 70.9%  | 77.3%  | 72.3%        | 74.0%        | A3, G7                 | +   | 2   |
| 70.9%  | 76.6%  | 74.7%        | 77.3%        | G1                     | +   | 2   |
| 70.9%  | 79.0%  | 71.0%        | 73.8%        | A2, G5                 | ×   | 8   |
| 70.9%  | 78.3%  | 68.7%        | 70.6%        | A2, A3, A5, G7         | +   | 8   |
| 70.9%  | 78.7%  | 73.6%        | 75.5%        | A2, A3, G7             | +   | 3   |
| 70.9%  | 78.7%  | 71.3%        | 73.8%        | A4, G5                 | ×   | 9   |
| 70.8%  | 77.2%  | 77.4%        | 77.8%        | A2, A3, A4             | ×   | 4   |
| 70.8%  | 79.5%  | 79.8%        | 82.7%        | A1, G1                 | ×   | 3   |
| 70.8%  | 76.5%  | 67.9%        | 69.3%        | A5, G7                 | ×   | 1   |
| 70.8%  | 78.3%  | 75.6%        | 76.5%        | A1, A2, A3, A4, A5     | +   | 5   |
| 70.8%  | 78.1%  | 78.1%        | 80.2%        | A1, G1                 | +   | 4   |
| 70.8%  | 78.8%  | 76.9%        | 79.7%        | A1, G3                 | +   | 3   |
| 70.8%  | 78.0%  | 77.5%        | 79.5%        | A1, G3                 | +   | 2   |
| 70.8%  | 78.1%  | 76.8%        | 78.9%        | A1, G3                 | +   | 4   |
| 70.8%  | 79.0%  | 79.3%        | 81.6%        | A1, G3                 | ×   | 1   |
| 70.8%  | 73.4%  | 84.9%        | <b>83.2%</b> | A2, G1                 | +   | 7   |
| 70.8%  | 78.6%  | 70.6%        | 73.5%        | A2, G5                 | +   | 6   |
| 70.8%  | 77.9%  | 71.8%        | 73.3%        | A2, A4, A5, G7         | +   | 9   |
| 70.8%  | 73.7%  | 78.7%        | 76.4%        | A4, G7                 | +   | 7   |

| S. Cls | S. Tot | C. Cls       | C. Tot       | CNNs                   | Op. | CRF |
|--------|--------|--------------|--------------|------------------------|-----|-----|
| 70.8%  | 79.5%  | 78.3%        | 81.6%        | A1, G1                 | ×   | 5   |
| 70.8%  | 77.6%  | 78.5%        | 79.3%        | A2, A3                 | +   | 1   |
| 70.8%  | 76.2%  | 69.8%        | 70.8%        | A5, G7                 | ×   | 4   |
| 70.8%  | 74.1%  | 78.7%        | 76.7%        | A4, G7                 | ×   | 7   |
| 70.8%  | 74.0%  | <b>86.5%</b> | <b>83.3%</b> | A1, A2, A5             | +   | 7   |
| 70.8%  | 77.7%  | 79.3%        | 79.9%        | A1, A2, A3, A4         | ×   | 2   |
| 70.8%  | 78.9%  | 69.8%        | 72.0%        | A2, A4, G7             | ×   | 8   |
| 70.8%  | 79.0%  | 65.5%        | 68.7%        | A4, G3                 | ×   | 49  |
| 70.8%  | 78.5%  | 68.0%        | 70.2%        | A2, A4, G7             | +   | 8   |
| 70.8%  | 78.7%  | 78.9%        | 80.3%        | A1, A2, A3, A4         | ×   | 3   |
| 70.8%  | 78.8%  | 69.7%        | 72.6%        | A3, G5                 | ×   | 8   |
| 70.8%  | 78.8%  | 75.4%        | 78.4%        | A1, G3                 | +   | 5   |
| 70.7%  | 78.1%  | 72.0%        | 74.0%        | A3, G7                 | ×   | 1   |
| 70.7%  | 78.0%  | 73.8%        | 75.2%        | A2, A3, A4             | +   | 6   |
| 70.7%  | 78.6%  | 68.9%        | 71.0%        | A2, A5, G7             | ×   | 8   |
| 70.7%  | 79.3%  | 67.7%        | 71.2%        | A3, G1                 | ×   | 49  |
| 70.7%  | 76.0%  | 69.9%        | 71.0%        | A5, G7                 | ×   | 2   |
| 70.7%  | 78.4%  | 71.6%        | 73.3%        | A1, A2, A3, A4, A5, G7 | +   | 6   |
| 70.7%  | 78.0%  | 73.8%        | 74.6%        | A2, A5                 | ×   | 6   |
| 70.7%  | 77.4%  | 72.6%        | 73.1%        | A2, A5                 | +   | 6   |
| 70.7%  | 78.7%  | 72.1%        | 74.3%        | A2, A3, G7             | +   | 5   |
| 70.7%  | 78.9%  | 77.7%        | 78.9%        | A1, A2, A5             | ×   | 5   |
| 70.7%  | 78.5%  | 69.1%        | 71.3%        | A2, A3, A4, G7         | +   | 8   |
| 70.7%  | 74.4%  | 80.4%        | 78.7%        | A3, G7                 | ×   | 7   |
| 70.7%  | 77.7%  | 78.6%        | 79.2%        | A1, A2, A3, A4         | ×   | 4   |
| 70.7%  | 74.0%  | 80.7%        | 78.8%        | A3, G7                 | +   | 7   |
| 70.7%  | 78.1%  | 76.0%        | 77.1%        | A1, A2, A5             | +   | 5   |
| 70.7%  | 73.4%  | 84.8%        | 81.8%        | A2, A4                 | +   | 7   |
| 70.7%  | 79.0%  | 78.0%        | 79.9%        | A1, A2, A3, G7         | ×   | 3   |
| 70.7%  | 74.3%  | 82.7%        | 81.2%        | A2, G5                 | ×   | 7   |
| 70.7%  | 78.8%  | 64.7%        | 67.6%        | A4, G1                 | +   | 58  |
| 70.7%  | 78.7%  | 70.9%        | 73.1%        | A2, A3, A4, G7         | ×   | 8   |
| 70.7%  | 78.4%  | 67.7%        | 70.3%        | A4, G5                 | ×   | 8   |
| 70.7%  | 77.8%  | 74.0%        | 75.8%        | A2, G7                 | ×   | 4   |
| 70.7%  | 78.7%  | 73.9%        | 75.9%        | A2, A4, G7             | ×   | 9   |
| 70.7%  | 77.9%  | 65.8%        | 68.2%        | A5, G5                 | ×   | 8   |
| 70.7%  | 79.4%  | 67.8%        | 70.9%        | A2, A4, G1             | ×   | 49  |
| 70.6%  | 78.0%  | 74.8%        | 75.4%        | A2, A4, A5             | ×   | 5   |
| 70.6%  | 78.0%  | 66.8%        | 69.1%        | A2, A5, G7             | +   | 8   |
| 70.6%  | 77.8%  | 74.4%        | 76.2%        | A2, G7                 | ×   | 2   |
| 70.6%  | 73.8%  | 82.8%        | 80.9%        | A2, G5                 | +   | 7   |
| 70.6%  | 78.9%  | 75.9%        | 78.6%        | A1, A2, G1             | +   | 6   |
| 70.6%  | 77.6%  | 78.5%        | 79.5%        | A2, A3                 | ×   | 1   |
| 70.6%  | 77.8%  | 76.7%        | 78.2%        | A1, A2, G7             | +   | 2   |
| 70.6%  | 78.4%  | 77.4%        | 79.1%        | A1, A2, A3, A4         | ×   | 5   |
| 70.6%  | 77.4%  | 74.0%        | 74.3%        | A2, A4, A5             | +   | 5   |
| 70.6%  | 78.6%  | 70.4%        | 72.6%        | A1, A2, A5, G7         | +   | 6   |
| 70.6%  | 78.3%  | 79.6%        | 81.8%        | A1, G1                 | ×   | 2   |
| 70.6%  | 77.8%  | 75.5%        | 77.0%        | A2, A3                 | ×   | 6   |
| 70.6%  | 77.7%  | 67.8%        | 70.0%        | A5, G5                 | +   | 9   |
| 70.6%  | 78.3%  | 78.8%        | 80.9%        | A1, G1                 | ×   | 4   |
| 70.6%  | 78.9%  | 75.5%        | 78.6%        | A1, G1                 | +   | 6   |
| 70.6%  | 77.8%  | 76.2%        | 77.7%        | A1, A2, G7             | +   | 4   |
| 70.5%  | 77.9%  | 73.3%        | 74.2%        | A2, A3, A5             | +   | 6   |
| 70.5%  | 79.1%  | 67.0%        | 69.8%        | A2, A5, G1             | ×   | 58  |
| 70.5%  | 78.7%  | 71.9%        | 74.1%        | A1, A2, A3, A4, G7     | +   | 6   |
| 70.5%  | 79.1%  | 74.2%        | 76.3%        | A1, A2, A3, A4, G7     | ×   | 6   |
| 70.5%  | 78.6%  | 68.0%        | 71.2%        | A3, G5                 | +   | 8   |
| 70.5%  | 73.6%  | 84.5%        | 81.7%        | A2, A4                 | ×   | 7   |

| S. Cls | S. Tot | C. Cls       | C. Tot       | CNNs                   | Op. | CRF |
|--------|--------|--------------|--------------|------------------------|-----|-----|
| 70.5%  | 77.9%  | 63.3%        | 65.7%        | A5, G3                 | +   | 49  |
| 70.5%  | 79.2%  | 75.7%        | 78.6%        | A1, A2, G1             | ×   | 8   |
| 70.5%  | 79.0%  | 72.1%        | 74.5%        | A2, A3, G7             | ×   | 6   |
| 70.5%  | 78.7%  | 72.2%        | 74.0%        | A1, A2, A3, A4, A5, G7 | ×   | 8   |
| 70.5%  | 78.5%  | 63.5%        | 66.5%        | A4, G3                 | +   | 58  |
| 70.5%  | 78.0%  | 74.5%        | 76.2%        | A1, A2, A3, A4         | +   | 6   |
| 70.5%  | 78.4%  | 65.4%        | 69.5%        | G1                     | +   | 49  |
| 70.5%  | 79.3%  | 76.9%        | 80.2%        | A1, G1                 | ×   | 6   |
| 70.5%  | 77.5%  | 69.4%        | 73.0%        | G3                     | +   | 5   |
| 70.5%  | 77.7%  | 67.4%        | 71.3%        | G3                     | +   | 12  |
| 70.5%  | 77.5%  | 69.4%        | 73.0%        | G3                     | +   | 11  |
| 70.5%  | 77.7%  | 75.3%        | 76.8%        | A2, A3                 | +   | 6   |
| 70.5%  | 77.2%  | 70.9%        | 74.4%        | G3                     | +   | 21  |
| 70.5%  | 78.6%  | 74.6%        | 76.3%        | A2, A3, A5, G7         | ×   | 9   |
| 70.5%  | 78.0%  | 74.3%        | 75.8%        | A2, A3, A4             | ×   | 6   |
| 70.5%  | 77.8%  | 72.3%        | 73.7%        | A2, A4                 | +   | 8   |
| 70.5%  | 78.2%  | 72.6%        | 74.4%        | A2, A3, A5, G7         | +   | 9   |
| 70.5%  | 79.2%  | 73.6%        | 75.4%        | A1, A2, A5, G7         | ×   | 6   |
| 70.5%  | 78.7%  | 75.8%        | 77.7%        | A1, A2, A3, G7         | +   | 3   |
| 70.5%  | 78.3%  | 75.9%        | 77.6%        | A1, A2, G7             | +   | 1   |
| 70.5%  | 77.2%  | 70.7%        | 74.1%        | G3                     | +   | 18  |
| 70.5%  | 77.7%  | 77.0%        | 78.0%        | A3                     | +   | 3   |
| 70.5%  | 77.7%  | 63.2%        | 65.8%        | A5, G1                 | +   | 58  |
| 70.5%  | 77.5%  | 69.5%        | 73.1%        | G3                     | +   | 13  |
| 70.5%  | 78.1%  | 73.0%        | 74.5%        | A2, A4                 | ×   | 8   |
| 70.5%  | 73.6%  | <b>85.7%</b> | <b>83.1%</b> | A1, A2, A3, A4         | +   | 7   |
| 70.5%  | 78.3%  | 73.4%        | 75.5%        | A2, G7                 | ×   | 1   |
| 70.4%  | 77.5%  | 66.1%        | 68.5%        | A4, G7                 | +   | 5   |
| 70.4%  | 77.2%  | 70.6%        | 74.1%        | G3                     | +   | 19  |
| 70.4%  | 77.2%  | 70.6%        | 74.1%        | G3                     | +   | 20  |
| 70.4%  | 73.3%  | 84.4%        | 81.5%        | A2, A3, A4             | +   | 7   |
| 70.4%  | 78.6%  | 75.1%        | 77.1%        | A2, A3, A4, G7         | ×   | 9   |
| 70.4%  | 78.9%  | 73.5%        | 76.3%        | A3, G5                 | ×   | 9   |
| 70.4%  | 77.7%  | 71.4%        | 73.6%        | A2, G7                 | +   | 1   |
| 70.4%  | 77.3%  | 69.6%        | 73.2%        | G3                     | +   | 15  |
| 70.4%  | 77.2%  | 70.7%        | 74.1%        | G3                     | +   | 28  |
| 70.4%  | 77.1%  | 77.5%        | 78.0%        | A3                     | +   | 1   |
| 70.4%  | 78.3%  | 74.4%        | 75.2%        | A2, A3, A5             | ×   | 6   |
| 70.4%  | 79.0%  | 74.9%        | 77.9%        | A2, G5                 | ×   | 9   |
| 70.4%  | 73.4%  | 84.2%        | 81.5%        | A2, A3, A4             | ×   | 7   |
| 70.4%  | 78.9%  | 76.4%        | 78.3%        | A1, A2, A3, G7         | ×   | 5   |
| 70.4%  | 77.7%  | 75.8%        | 77.0%        | A3                     | +   | 5   |
| 70.4%  | 78.7%  | 72.0%        | 73.7%        | A2, A3, A5, G7         | ×   | 6   |
| 70.4%  | 78.5%  | 73.7%        | 76.8%        | A1, G3                 | +   | 6   |
| 70.4%  | 79.2%  | 78.4%        | 81.3%        | A1, G3                 | ×   | 3   |
| 70.4%  | 77.4%  | 79.5%        | 81.1%        | A2                     | +   | 42  |
| 70.4%  | 77.1%  | 70.4%        | 73.8%        | G3                     | +   | 3   |
| 70.4%  | 77.6%  | 66.8%        | 70.9%        | G3                     | +   | 10  |
| 70.4%  | 77.1%  | 70.4%        | 73.9%        | G3                     | +   | 38  |
| 70.4%  | 77.1%  | 70.4%        | 73.9%        | G3                     | +   | 39  |
| 70.4%  | 77.1%  | 73.2%        | 74.9%        | A2, G7                 | +   | 2   |
| 70.4%  | 78.7%  | 78.0%        | 79.5%        | A1, A2, G7             | ×   | 1   |
| 70.4%  | 79.1%  | 67.5%        | 70.9%        | A3, G1                 | ×   | 58  |
| 70.3%  | 77.1%  | 70.3%        | 73.7%        | G3                     | +   | 41  |
| 70.3%  | 78.6%  | 72.0%        | 74.9%        | A3, G5                 | +   | 9   |
| 70.3%  | 77.8%  | 76.9%        | 78.1%        | A2, A4                 | +   | 9   |
| 70.3%  | 78.3%  | 69.0%        | 72.1%        | A2, G5                 | +   | 8   |
| 70.3%  | 77.2%  | 72.8%        | 74.5%        | A2, G7                 | +   | 4   |
| 70.3%  | 78.1%  | 77.4%        | 78.7%        | A2, A4                 | ×   | 9   |

| S. Cls | S. Tot | C. Cls       | C. Tot       | CNNs                   | Op. | CRF |
|--------|--------|--------------|--------------|------------------------|-----|-----|
| 70.3%  | 78.6%  | 75.1%        | 76.4%        | A1, A2, A3, A4, A5     | ×   | 6   |
| 70.3%  | 79.1%  | 79.5%        | 82.4%        | A1, A2, G1             | ×   | 9   |
| 70.3%  | 78.2%  | 78.7%        | 80.7%        | A1, G3                 | ×   | 2   |
| 70.3%  | 76.2%  | 77.2%        | 77.6%        | A3                     | +   | 2   |
| 70.3%  | 77.4%  | 69.0%        | 72.7%        | G3                     | +   | 26  |
| 70.3%  | 78.3%  | 64.5%        | 67.3%        | A5, G3                 | ×   | 49  |
| 70.3%  | 74.3%  | 81.5%        | 80.1%        | A2, G7                 | ×   | 7   |
| 70.3%  | 78.3%  | 78.0%        | 80.0%        | A1, G3                 | ×   | 4   |
| 70.3%  | 77.4%  | 68.2%        | 72.2%        | G3                     | +   | 16  |
| 70.3%  | 77.4%  | 78.9%        | 80.4%        | A2                     | +   | 19  |
| 70.3%  | 77.4%  | 78.9%        | 80.4%        | A2                     | +   | 20  |
| 70.3%  | 79.0%  | 67.6%        | 70.5%        | A2, A4, G1             | ×   | 58  |
| 70.3%  | 78.5%  | 65.2%        | 68.2%        | A5, G1                 | ×   | 58  |
| 70.3%  | 77.5%  | 68.0%        | 71.9%        | G3                     | +   | 6   |
| 70.3%  | 77.5%  | 68.0%        | 71.9%        | G3                     | +   | 14  |
| 70.3%  | 79.0%  | 66.1%        | 69.8%        | A3, G1                 | +   | 49  |
| 70.3%  | 77.0%  | 67.3%        | 70.7%        | G3                     | +   | 33  |
| 70.3%  | 74.0%  | <b>85.8%</b> | <b>83.3%</b> | A1, A2, A3, A4         | ×   | 7   |
| 70.3%  | 78.7%  | 65.0%        | 68.0%        | A4, G3                 | ×   | 58  |
| 70.3%  | 78.2%  | 68.3%        | 72.1%        | G1                     | +   | 61  |
| 70.3%  | 77.6%  | 68.0%        | 71.9%        | G3                     | +   | 17  |
| 70.3%  | 77.0%  | 70.8%        | 74.3%        | G3                     | +   | 42  |
| 70.3%  | 77.2%  | 66.4%        | 70.0%        | G3                     | +   | 37  |
| 70.3%  | 78.2%  | 77.9%        | 79.4%        | A1, A2, G7             | ×   | 2   |
| 70.3%  | 78.9%  | 66.6%        | 70.0%        | A3, G3                 | ×   | 49  |
| 70.3%  | 78.1%  | 71.7%        | 73.8%        | A2, A4, G7             | +   | 9   |
| 70.3%  | 77.1%  | 70.9%        | 71.6%        | A2, A5                 | +   | 8   |
| 70.3%  | 76.3%  | 76.6%        | 76.9%        | A3                     | +   | 4   |
| 70.3%  | 77.3%  | 78.8%        | 80.4%        | A2                     | +   | 18  |
| 70.2%  | 76.0%  | 74.9%        | 74.5%        | A4                     | +   | 1   |
| 70.2%  | 76.2%  | 64.7%        | 66.6%        | A5, G7                 | +   | 3   |
| 70.2%  | 77.7%  | 67.5%        | 69.8%        | A4, G7                 | ×   | 5   |
| 70.2%  | 78.1%  | 65.3%        | 69.4%        | G1                     | +   | 58  |
| 70.2%  | 76.3%  | 76.8%        | 79.4%        | G1                     | +   | 62  |
| 70.2%  | 77.4%  | 78.9%        | 80.4%        | A2                     | +   | 28  |
| 70.2%  | 76.4%  | 78.0%        | 78.7%        | A2, A3                 | +   | 2   |
| 70.2%  | 77.4%  | 78.8%        | 80.3%        | A2                     | +   | 40  |
| 70.2%  | 77.2%  | 78.9%        | 80.5%        | A2                     | +   | 21  |
| 70.2%  | 76.5%  | 78.2%        | 78.8%        | A2, A3                 | ×   | 2   |
| 70.2%  | 77.7%  | 72.3%        | 73.8%        | A2, A3, A4             | +   | 8   |
| 70.2%  | 76.9%  | 70.2%        | 73.8%        | G3                     | +   | 40  |
| 70.2%  | 78.1%  | 69.8%        | 71.8%        | A1, A2, A3, A4, A5, G7 | +   | 8   |
| 70.2%  | 78.2%  | 77.1%        | 78.7%        | A1, A2, G7             | ×   | 4   |
| 70.2%  | 77.3%  | 78.3%        | 80.0%        | A2                     | +   | 15  |
| 70.2%  | 76.4%  | 63.8%        | 66.0%        | A5, G7                 | +   | 5   |
| 70.2%  | 78.8%  | 66.1%        | 69.2%        | A2, A4, G1             | +   | 49  |
| 70.2%  | 78.5%  | 74.0%        | 76.1%        | A1, A2, A3, G7         | +   | 5   |
| 70.2%  | 73.7%  | 82.3%        | 80.2%        | A2, G7                 | +   | 7   |
| 70.2%  | 77.7%  | 72.1%        | 73.2%        | A2, A5                 | ×   | 8   |
| 70.2%  | 77.9%  | 68.9%        | 71.1%        | A5, G5                 | ×   | 9   |
| 70.2%  | 77.4%  | 68.7%        | 70.7%        | A4, G7                 | ×   | 3   |
| 70.2%  | 78.7%  | 66.7%        | 70.4%        | A2, G1                 | +   | 49  |
| 70.2%  | 76.6%  | 77.5%        | 78.2%        | A2, A3                 | ×   | 4   |
| 70.2%  | 79.1%  | 77.1%        | 80.1%        | A1, G3                 | ×   | 5   |
| 70.2%  | 78.4%  | 70.2%        | 72.6%        | A2, A3, G7             | +   | 6   |
| 70.2%  | 77.8%  | 77.0%        | 78.2%        | A2, A3, A4             | +   | 9   |
| 70.2%  | 77.8%  | 70.6%        | 72.4%        | A2, A5, G7             | +   | 9   |
| 70.2%  | 78.3%  | 73.2%        | 75.3%        | A2, A3, A4, G7         | +   | 9   |
| 70.2%  | 78.3%  | 72.8%        | 74.7%        | A2, A5, G7             | ×   | 9   |

| S. Cls | S. Tot | C. Cls | C. Tot       | CNNs                   | Op. | CRF |
|--------|--------|--------|--------------|------------------------|-----|-----|
| 70.2%  | 74.3%  | 84.6%  | 82.8%        | A1, A2, G7             | +   | 7   |
| 70.2%  | 76.2%  | 76.6%  | 79.3%        | G1                     | +   | 63  |
| 70.2%  | 76.5%  | 77.5%  | 78.1%        | A2, A3                 | +   | 4   |
| 70.2%  | 77.7%  | 73.8%  | 75.1%        | A1, A2, A5             | +   | 6   |
| 70.2%  | 78.6%  | 73.9%  | 76.9%        | A1, A2, G1             | +   | 8   |
| 70.2%  | 76.2%  | 76.8%  | 79.4%        | G1                     | +   | 64  |
| 70.2%  | 77.1%  | 78.8%  | 80.1%        | A2                     | +   | 43  |
| 70.2%  | 78.6%  | 73.6%  | 76.9%        | A1, G1                 | +   | 8   |
| 70.1%  | 79.1%  | 75.3%  | 78.6%        | A1, G1                 | ×   | 8   |
| 70.1%  | 77.0%  | 80.0%  | 81.4%        | A2                     | +   | 52  |
| 70.1%  | 75.1%  | 75.2%  | 74.8%        | A4                     | +   | 2   |
| 70.1%  | 77.4%  | 67.4%  | 71.4%        | G3                     | +   | 22  |
| 70.1%  | 79.0%  | 68.3%  | 71.8%        | A2, G1                 | ×   | 49  |
| 70.1%  | 78.5%  | 75.9%  | 77.4%        | A1, A2, A5             | ×   | 6   |
| 70.1%  | 77.4%  | 78.8%  | 80.2%        | A2                     | +   | 38  |
| 70.1%  | 77.4%  | 78.8%  | 80.2%        | A2                     | +   | 39  |
| 70.1%  | 77.4%  | 78.8%  | 80.2%        | A2                     | +   | 3   |
| 70.1%  | 77.0%  | 80.5%  | 81.9%        | A2                     | +   | 59  |
| 70.1%  | 78.4%  | 68.6%  | 71.0%        | A1, A2, A5, G7         | +   | 8   |
| 70.1%  | 77.4%  | 67.3%  | 71.3%        | G3                     | +   | 23  |
| 70.1%  | 77.8%  | 73.6%  | 74.7%        | A1, A2, A3, A4, A5     | +   | 6   |
| 70.1%  | 77.5%  | 73.8%  | 75.6%        | A2, A3                 | ×   | 8   |
| 70.1%  | 77.9%  | 76.9%  | 77.6%        | A2, A5                 | ×   | 9   |
| 70.1%  | 78.1%  | 75.8%  | 77.5%        | A1, A2, A3, A4         | ×   | 6   |
| 70.1%  | 77.3%  | 77.6%  | 79.1%        | A2                     | +   | 11  |
| 70.1%  | 77.3%  | 77.6%  | 79.1%        | A2                     | +   | 5   |
| 70.1%  | 77.7%  | 73.2%  | 73.9%        | A2, A4, A5             | ×   | 6   |
| 70.1%  | 75.1%  | 74.8%  | 74.5%        | A4                     | +   | 4   |
| 70.1%  | 77.5%  | 70.8%  | 72.4%        | A2, A4                 | +   | 65  |
| 70.1%  | 77.5%  | 67.0%  | 71.0%        | G3                     | +   | 24  |
| 70.1%  | 77.5%  | 67.0%  | 71.0%        | G3                     | +   | 27  |
| 70.1%  | 77.5%  | 79.4%  | 80.5%        | A1, A2, A3             | +   | 1   |
| 70.1%  | 78.8%  | 72.5%  | 74.7%        | A1, A2, A3, A4, G7     | ×   | 8   |
| 70.1%  | 77.0%  | 80.0%  | 81.4%        | A2                     | +   | 55  |
| 70.1%  | 78.0%  | 77.3%  | 78.7%        | A2, A3, A4             | ×   | 9   |
| 70.1%  | 77.4%  | 67.1%  | 71.1%        | G3                     | +   | 29  |
| 70.1%  | 77.5%  | 66.9%  | 70.9%        | G3                     | +   | 25  |
| 70.1%  | 77.5%  | 67.0%  | 70.9%        | G3                     | +   | 31  |
| 70.1%  | 76.5%  | 70.4%  | 73.7%        | G3                     | +   | 43  |
| 70.1%  | 78.4%  | 70.0%  | 72.5%        | A1, A2, A3, A4, G7     | +   | 8   |
| 70.1%  | 77.4%  | 67.0%  | 71.0%        | G3                     | +   | 30  |
| 70.1%  | 77.5%  | 66.7%  | 70.7%        | G3                     | +   | 8   |
| 70.0%  | 77.7%  | 72.6%  | 74.7%        | A1, A2, A3, A4         | +   | 8   |
| 70.0%  | 78.8%  | 70.4%  | 73.0%        | A2, A3, G7             | ×   | 8   |
| 70.0%  | 77.8%  | 71.5%  | 73.3%        | A2, A4                 | ×   | 65  |
| 70.0%  | 77.5%  | 66.6%  | 70.6%        | G3                     | +   | 32  |
| 70.0%  | 78.0%  | 70.7%  | 73.2%        | A3, G7                 | ×   | 3   |
| 70.0%  | 77.5%  | 66.7%  | 70.7%        | G3                     | +   | 35  |
| 70.0%  | 74.7%  | 84.4%  | <b>83.1%</b> | A1, A2, G7             | ×   | 7   |
| 70.0%  | 77.3%  | 73.6%  | 75.4%        | A2, A3                 | +   | 8   |
| 70.0%  | 78.4%  | 78.6%  | 81.3%        | A1, A2, G1             | +   | 9   |
| 70.0%  | 77.2%  | 77.6%  | 79.1%        | A2                     | +   | 13  |
| 70.0%  | 77.5%  | 66.5%  | 70.5%        | G3                     | +   | 34  |
| 70.0%  | 77.5%  | 66.7%  | 70.6%        | G3                     | +   | 36  |
| 70.0%  | 77.6%  | 71.5%  | 72.7%        | A2, A3, A5             | +   | 8   |
| 70.0%  | 72.3%  | 75.5%  | 72.9%        | A5, G7                 | +   | 7   |
| 70.0%  | 77.5%  | 73.9%  | 75.4%        | A3                     | +   | 6   |
| 70.0%  | 77.0%  | 72.4%  | 72.8%        | A2, A4, A5             | +   | 6   |
| 70.0%  | 77.9%  | 74.3%  | 75.9%        | A1, A2, A3, A4, A5, G7 | +   | 9   |

| S. Cls | S. Tot | C. Cls | C. Tot       | CNNs                   | Op. | CRF |
|--------|--------|--------|--------------|------------------------|-----|-----|
| 70.0%  | 78.1%  | 69.6%  | 72.1%        | A3, G7                 | ×   | 5   |
| 70.0%  | 77.6%  | 74.6%  | 77.0%        | A1, G5                 | +   | 1   |
| 70.0%  | 76.9%  | 78.8%  | 80.0%        | A2                     | +   | 53  |
| 70.0%  | 76.9%  | 78.8%  | 79.9%        | A2                     | +   | 1   |
| 70.0%  | 76.5%  | 79.2%  | 79.9%        | A1, A2, A3             | +   | 2   |
| 70.0%  | 78.5%  | 76.9%  | 78.3%        | A1, A2, A3, A4, A5, G7 | ×   | 9   |
| 70.0%  | 78.8%  | 71.5%  | 73.8%        | A1, A2, A5, G7         | ×   | 8   |
| 70.0%  | 78.8%  | 65.7%  | 69.2%        | A3, G1                 | +   | 58  |
| 70.0%  | 77.7%  | 72.8%  | 74.5%        | A2, A3, A4             | ×   | 8   |
| 69.9%  | 77.6%  | 61.9%  | 65.0%        | A4, G5                 | +   | 49  |
| 69.9%  | 78.2%  | 72.4%  | 75.0%        | A2, G7                 | ×   | 3   |
| 69.9%  | 78.0%  | 72.7%  | 73.9%        | A2, A3, A5             | ×   | 8   |
| 69.9%  | 72.9%  | 76.3%  | 73.8%        | A5, G7                 | ×   | 7   |
| 69.9%  | 78.6%  | 74.3%  | 76.6%        | A1, A2, A3, G7         | ×   | 6   |
| 69.9%  | 78.7%  | 67.2%  | 70.7%        | A2, G3                 | ×   | 49  |
| 69.9%  | 75.9%  | 76.7%  | 79.5%        | G1                     | +   | 66  |
| 69.9%  | 78.3%  | 71.9%  | 75.2%        | A1, G3                 | +   | 8   |
| 69.9%  | 77.7%  | 76.0%  | 76.7%        | A2, A4, A5             | ×   | 9   |
| 69.9%  | 77.2%  | 64.7%  | 67.3%        | A4, G7                 | +   | 6   |
| 69.9%  | 78.4%  | 70.4%  | 72.3%        | A2, A3, A5, G7         | ×   | 8   |
| 69.9%  | 76.5%  | 71.6%  | 75.0%        | G3                     | +   | 52  |
| 69.9%  | 77.0%  | 74.9%  | 77.1%        | A1, G5                 | +   | 2   |
| 69.9%  | 78.3%  | 73.5%  | 74.9%        | A1, A2, A3, A4, A5     | ×   | 8   |
| 69.9%  | 77.1%  | 74.4%  | 76.5%        | A1, G5                 | +   | 4   |
| 69.9%  | 78.5%  | 65.4%  | 68.8%        | A3, G3                 | +   | 49  |
| 69.9%  | 77.1%  | 77.3%  | 78.9%        | A2                     | +   | 16  |
| 69.9%  | 76.7%  | 74.3%  | 74.2%        | A4                     | +   | 3   |
| 69.9%  | 78.5%  | 73.0%  | 76.0%        | A2, G5                 | +   | 9   |
| 69.9%  | 76.4%  | 71.7%  | 75.0%        | G3                     | +   | 55  |
| 69.9%  | 77.4%  | 73.9%  | 77.5%        | G1                     | +   | 67  |
| 69.9%  | 78.9%  | 75.5%  | 78.6%        | A1, G3                 | ×   | 6   |
| 69.9%  | 76.5%  | 78.5%  | 79.2%        | A1, A2, A3             | +   | 4   |
| 69.9%  | 77.2%  | 77.3%  | 78.7%        | A2                     | +   | 26  |
| 69.9%  | 77.5%  | 70.9%  | 72.6%        | A2, A3, A4             | +   | 65  |
| 69.8%  | 77.3%  | 75.9%  | 76.4%        | A2, A5                 | +   | 9   |
| 69.8%  | 78.5%  | 74.5%  | 77.0%        | A2, A3, G7             | ×   | 9   |
| 69.8%  | 77.4%  | 65.9%  | 68.4%        | A4, G7                 | ×   | 6   |
| 69.8%  | 77.0%  | 70.2%  | 73.9%        | G3                     | +   | 50  |
| 69.8%  | 78.7%  | 65.8%  | 69.4%        | A3, G3                 | ×   | 58  |
| 69.8%  | 77.3%  | 78.8%  | 80.2%        | A2b                    | +   | 3   |
| 69.8%  | 78.1%  | 76.1%  | 79.3%        | A1, G3                 | +   | 9   |
| 69.8%  | 78.3%  | 71.1%  | 73.8%        | A2, G7                 | ×   | 5   |
| 69.8%  | 77.5%  | 76.4%  | 77.2%        | A2, A3, A5             | +   | 9   |
| 69.8%  | 77.9%  | 77.1%  | 78.1%        | A2, A3, A5             | ×   | 9   |
| 69.8%  | 78.4%  | 77.1%  | 79.3%        | A1, G5                 | ×   | 1   |
| 69.8%  | 77.4%  | 71.8%  | 73.5%        | A1, A2, A5             | +   | 8   |
| 69.8%  | 76.9%  | 69.2%  | 70.2%        | A2, A5                 | +   | 65  |
| 69.8%  | 78.0%  | 64.3%  | 67.2%        | A2, A5, G1             | +   | 58  |
| 69.8%  | 77.3%  | 66.3%  | 70.3%        | G3                     | +   | 44  |
| 69.8%  | 78.5%  | 65.6%  | 68.4%        | A2, A4, G1             | +   | 58  |
| 69.8%  | 77.5%  | 70.8%  | 72.0%        | A2, A5                 | ×   | 65  |
| 69.8%  | 77.3%  | 62.3%  | 64.8%        | A5, G3                 | +   | 58  |
| 69.8%  | 73.1%  | 85.3%  | <b>83.7%</b> | A1, A2, G1             | +   | 7   |
| 69.8%  | 78.4%  | 66.6%  | 70.1%        | A2, G1                 | +   | 58  |
| 69.8%  | 78.8%  | 68.1%  | 71.7%        | A2, G1                 | ×   | 58  |
| 69.8%  | 77.3%  | 66.1%  | 70.2%        | G3                     | +   | 45  |
| 69.8%  | 78.2%  | 74.9%  | 76.9%        | A1, A2, A3, A4, G7     | +   | 9   |
| 69.8%  | 78.1%  | 77.9%  | 81.0%        | A1, G1                 | +   | 9   |
| 69.8%  | 76.7%  | 78.9%  | 80.0%        | A2b                    | +   | 1   |



| S. Cls | S. Tot | C. Cls | C. Tot       | CNNs               | Op. | CRF |
|--------|--------|--------|--------------|--------------------|-----|-----|
| 69.8%  | 77.7%  | 78.8%  | 80.4%        | A1, A2, A3         | +   | 3   |
| 69.8%  | 77.3%  | 66.0%  | 70.1%        | G3                 | +   | 46  |
| 69.7%  | 77.2%  | 77.6%  | 79.1%        | A2b                | +   | 5   |
| 69.7%  | 78.6%  | 77.1%  | 79.0%        | A1, A2, A3, A4, G7 | ×   | 9   |
| 69.7%  | 71.8%  | 81.6%  | 77.8%        | A4                 | +   | 7   |
| 69.7%  | 77.2%  | 72.3%  | 74.3%        | A2, A3             | ×   | 65  |
| 69.7%  | 76.5%  | 69.2%  | 72.7%        | G3                 | +   | 56  |
| 69.7%  | 76.0%  | 70.4%  | 73.6%        | G3                 | +   | 1   |
| 69.7%  | 77.0%  | 62.8%  | 65.4%        | A2, A4, A5, G7     | +   | 49  |
| 69.7%  | 76.0%  | 70.4%  | 73.6%        | G3                 | +   | 53  |
| 69.7%  | 77.3%  | 65.9%  | 69.9%        | G3                 | +   | 47  |
| 69.7%  | 77.7%  | 77.1%  | 79.0%        | A1, G5             | ×   | 2   |
| 69.7%  | 77.8%  | 76.6%  | 78.4%        | A1, G5             | ×   | 4   |
| 69.7%  | 77.8%  | 63.9%  | 66.5%        | A5, G3             | ×   | 58  |
| 69.7%  | 77.3%  | 65.7%  | 69.8%        | G3                 | +   | 48  |
| 69.7%  | 77.0%  | 76.3%  | 77.9%        | A2                 | +   | 14  |
| 69.7%  | 78.2%  | 71.7%  | 74.3%        | A1, A2, A3, G7     | +   | 6   |
| 69.7%  | 78.5%  | 79.0%  | 82.2%        | A1, G1             | ×   | 9   |
| 69.7%  | 77.0%  | 76.3%  | 77.9%        | A2                 | +   | 6   |
| 69.7%  | 77.6%  | 67.6%  | 70.4%        | A3, G7             | +   | 5   |
| 69.7%  | 76.1%  | 62.7%  | 65.0%        | A5, G7             | +   | 6   |
| 69.7%  | 76.2%  | 71.8%  | 75.1%        | G3                 | +   | 59  |
| 69.7%  | 76.7%  | 72.7%  | 73.1%        | A4                 | +   | 5   |
| 69.7%  | 78.1%  | 74.2%  | 75.8%        | A1, A2, A5         | ×   | 8   |
| 69.7%  | 77.5%  | 79.9%  | 81.1%        | A1, A2, A3         | ×   | 1   |
| 69.7%  | 78.5%  | 68.0%  | 71.4%        | A2, A3, G1         | ×   | 49  |
| 69.7%  | 78.1%  | 68.3%  | 71.0%        | A2, A3, G7         | +   | 8   |
| 69.7%  | 77.0%  | 75.2%  | 75.7%        | A2, A4, A5         | +   | 9   |
| 69.7%  | 77.2%  | 78.0%  | 79.5%        | A2, A3             | +   | 9   |
| 69.7%  | 77.6%  | 73.6%  | 76.5%        | A1, G5             | +   | 3   |
| 69.7%  | 77.5%  | 71.0%  | 73.3%        | A1, A2, A3, A4     | +   | 65  |
| 69.7%  | 77.5%  | 71.7%  | 72.6%        | A2, A4, A5         | ×   | 8   |
| 69.7%  | 76.2%  | 80.9%  | 82.1%        | A2                 | +   | 62  |
| 69.6%  | 77.3%  | 78.2%  | 79.7%        | A2, A3             | ×   | 9   |
| 69.6%  | 77.8%  | 74.1%  | 76.1%        | A1, A2, A3, A4     | ×   | 8   |
| 69.6%  | 77.2%  | 64.5%  | 68.7%        | G3                 | +   | 54  |
| 69.6%  | 77.5%  | 76.9%  | 78.3%        | A3                 | +   | 9   |
| 69.6%  | 77.1%  | 72.1%  | 74.1%        | A2, A3             | +   | 65  |
| 69.6%  | 77.4%  | 70.0%  | 71.4%        | A2, A3, A5         | +   | 65  |
| 69.6%  | 77.3%  | 64.7%  | 68.8%        | G3                 | +   | 51  |
| 69.6%  | 77.5%  | 68.8%  | 71.4%        | A3, G7             | +   | 3   |
| 69.6%  | 76.8%  | 61.1%  | 63.5%        | A5, G5             | +   | 49  |
| 69.6%  | 76.1%  | 80.9%  | 82.1%        | A2                 | +   | 64  |
| 69.6%  | 77.1%  | 78.6%  | 80.1%        | A2                 | +   | 41  |
| 69.6%  | 76.9%  | 76.4%  | 77.9%        | A2                 | +   | 17  |
| 69.6%  | 77.2%  | 72.4%  | 74.1%        | A3                 | +   | 8   |
| 69.6%  | 76.4%  | 65.0%  | 67.1%        | A5, G7             | ×   | 5   |
| 69.6%  | 78.4%  | 77.8%  | 81.0%        | A1, G3             | ×   | 9   |
| 69.6%  | 76.0%  | 81.1%  | 82.3%        | A2                 | +   | 66  |
| 69.6%  | 77.5%  | 71.7%  | 73.2%        | A1, A2, A3, A4, A5 | +   | 8   |
| 69.6%  | 76.8%  | 70.7%  | 71.4%        | A2, A4, A5         | +   | 8   |
| 69.6%  | 76.3%  | 65.9%  | 67.9%        | A5, G7             | ×   | 3   |
| 69.6%  | 73.4%  | 85.4%  | <b>83.9%</b> | A1, A2, G1         | ×   | 7   |
| 69.6%  | 76.1%  | 80.8%  | 82.0%        | A2                 | +   | 63  |
| 69.5%  | 76.9%  | 74.5%  | 75.8%        | A2                 | +   | 33  |
| 69.5%  | 76.8%  | 76.2%  | 77.9%        | A2                 | +   | 22  |
| 69.5%  | 78.1%  | 72.4%  | 74.9%        | A2, A3, G7         | +   | 9   |
| 69.5%  | 76.8%  | 66.1%  | 68.7%        | A4, G7             | +   | 9   |
| 69.5%  | 77.0%  | 63.4%  | 66.2%        | A4, G7             | +   | 8   |

| S. Cls | S. Tot | C. Cls | C. Tot | CNNs               | Op. | CRF |
|--------|--------|--------|--------|--------------------|-----|-----|
| 69.5%  | 77.5%  | 71.3%  | 73.2%  | A2, A3, A4         | ×   | 65  |
| 69.5%  | 78.3%  | 72.6%  | 75.1%  | A1, A2, A3, G7     | ×   | 8   |
| 69.5%  | 77.7%  | 71.2%  | 72.6%  | A2, A3, A5         | ×   | 65  |
| 69.5%  | 78.1%  | 71.8%  | 73.6%  | A1, A2, A3, A4, A5 | ×   | 65  |
| 69.5%  | 77.4%  | 60.9%  | 64.2%  | A4, G5             | +   | 58  |
| 69.5%  | 76.8%  | 76.1%  | 77.8%  | A2                 | +   | 23  |
| 69.5%  | 77.6%  | 79.4%  | 81.0%  | A1, A2, A3         | ×   | 3   |
| 69.5%  | 77.5%  | 77.7%  | 79.2%  | A1, A2, A3, A4     | +   | 9   |
| 69.5%  | 78.6%  | 73.9%  | 77.2%  | A1, G3             | ×   | 8   |
| 69.5%  | 78.2%  | 64.7%  | 68.1%  | A3, G3             | +   | 58  |
| 69.5%  | 77.2%  | 64.6%  | 67.3%  | A4, G7             | ×   | 8   |
| 69.5%  | 76.8%  | 70.1%  | 73.8%  | G3                 | +   | 57  |
| 69.5%  | 76.8%  | 70.1%  | 73.8%  | G3                 | +   | 9   |
| 69.5%  | 72.2%  | 83.4%  | 80.7%  | A3                 | +   | 7   |
| 69.5%  | 77.6%  | 71.7%  | 75.0%  | A1, G5             | +   | 5   |
| 69.5%  | 78.4%  | 77.0%  | 79.3%  | A1, A2, G7         | ×   | 3   |
| 69.5%  | 78.2%  | 66.1%  | 69.5%  | A2, G3             | +   | 49  |
| 69.5%  | 78.5%  | 67.1%  | 70.5%  | A2, G3             | ×   | 58  |
| 69.5%  | 77.7%  | 73.4%  | 75.3%  | A1, A2, A5, G7     | +   | 9   |
| 69.5%  | 77.5%  | 77.3%  | 79.1%  | A1, A2, A3         | +   | 5   |
| 69.5%  | 77.2%  | 70.1%  | 71.9%  | A1, A2, A5         | +   | 65  |
| 69.5%  | 75.2%  | 76.7%  | 79.2%  | G1                 | +   | 68  |
| 69.5%  | 75.3%  | 70.5%  | 73.3%  | G3                 | +   | 4   |
| 69.5%  | 77.8%  | 68.0%  | 70.8%  | A3, G7             | ×   | 6   |
| 69.4%  | 77.6%  | 76.7%  | 78.0%  | A1, A2, A3, A4, A5 | +   | 9   |
| 69.4%  | 77.7%  | 68.3%  | 71.3%  | A2, G7             | +   | 5   |
| 69.4%  | 76.5%  | 79.4%  | 80.4%  | A1, A2, A3         | ×   | 2   |
| 69.4%  | 76.8%  | 75.7%  | 77.6%  | A2                 | +   | 29  |
| 69.4%  | 77.6%  | 69.8%  | 72.5%  | A2, G7             | +   | 3   |
| 69.4%  | 78.4%  | 76.1%  | 78.9%  | A1, G5             | ×   | 3   |
| 69.4%  | 78.5%  | 67.8%  | 71.0%  | A2, A3, G1         | ×   | 58  |
| 69.4%  | 76.6%  | 61.4%  | 64.1%  | A2, A4, A5, G7     | +   | 58  |
| 69.4%  | 78.0%  | 69.4%  | 72.2%  | A2, G7             | ×   | 6   |
| 69.4%  | 76.7%  | 75.6%  | 77.4%  | A2                 | +   | 30  |
| 69.4%  | 77.5%  | 78.0%  | 79.8%  | A1, A2, A3         | ×   | 5   |
| 69.4%  | 75.4%  | 78.3%  | 79.0%  | A2                 | +   | 2   |
| 69.4%  | 76.6%  | 75.0%  | 77.0%  | A2                 | +   | 12  |
| 69.4%  | 77.1%  | 61.8%  | 64.8%  | A2, A5, G7         | +   | 49  |
| 69.4%  | 77.6%  | 63.3%  | 66.4%  | A2, A5, G7         | ×   | 49  |
| 69.4%  | 77.2%  | 67.6%  | 70.1%  | A4, G7             | ×   | 9   |
| 69.4%  | 78.0%  | 78.0%  | 79.3%  | A1, A2, A3, A4, A5 | ×   | 9   |
| 69.4%  | 77.3%  | 63.0%  | 66.0%  | A2, A3, A5, G7     | +   | 49  |
| 69.4%  | 78.1%  | 66.4%  | 70.0%  | A2, A3, G1         | +   | 49  |
| 69.4%  | 76.9%  | 76.3%  | 77.9%  | A2b                | +   | 6   |
| 69.3%  | 77.3%  | 63.9%  | 66.6%  | A2, A4, A5, G7     | ×   | 49  |
| 69.3%  | 78.4%  | 75.4%  | 77.8%  | A1, A2, G7         | ×   | 5   |
| 69.3%  | 78.0%  | 77.3%  | 79.5%  | A1, A2, A3, G7     | ×   | 9   |
| 69.3%  | 76.7%  | 73.5%  | 74.9%  | A2                 | +   | 37  |
| 69.3%  | 77.5%  | 62.6%  | 65.6%  | A2, A4, G7         | +   | 49  |
| 69.3%  | 76.9%  | 78.5%  | 80.1%  | A2                 | +   | 50  |
| 69.3%  | 76.7%  | 74.9%  | 76.7%  | A2                 | +   | 24  |
| 69.3%  | 77.9%  | 72.4%  | 74.4%  | A1, A2, A5         | ×   | 65  |
| 69.3%  | 75.5%  | 77.7%  | 78.4%  | A2                 | +   | 4   |
| 69.3%  | 76.5%  | 78.8%  | 79.7%  | A1, A2, A3         | ×   | 4   |
| 69.3%  | 75.4%  | 78.3%  | 78.9%  | A2b                | +   | 2   |
| 69.3%  | 75.8%  | 61.6%  | 64.0%  | A5, G7             | +   | 8   |
| 69.3%  | 72.1%  | 84.3%  | 81.7%  | A2, A3             | +   | 7   |
| 69.3%  | 77.3%  | 70.2%  | 71.4%  | A2, A4, A5         | ×   | 65  |
| 69.3%  | 76.7%  | 74.8%  | 76.6%  | A2                 | +   | 25  |

| S. Cls | S. Tot | C. Cls | C. Tot | CNNs                   | Op. | CRF |
|--------|--------|--------|--------|------------------------|-----|-----|
| 69.3%  | 77.6%  | 74.5%  | 76.8%  | A1, A2, G7             | +   | 3   |
| 69.3%  | 75.4%  | 77.6%  | 78.3%  | A2b                    | +   | 4   |
| 69.3%  | 77.0%  | 61.7%  | 64.5%  | A5, G5                 | ×   | 49  |
| 69.3%  | 72.1%  | 84.3%  | 81.8%  | A2, A3                 | ×   | 7   |
| 69.3%  | 77.5%  | 72.5%  | 74.7%  | A1, A2, A3, A4         | ×   | 65  |
| 69.2%  | 77.5%  | 62.8%  | 65.9%  | A4, G5                 | ×   | 49  |
| 69.2%  | 76.7%  | 74.6%  | 76.5%  | A2                     | +   | 8   |
| 69.2%  | 75.0%  | 70.9%  | 73.6%  | G3                     | +   | 2   |
| 69.2%  | 77.9%  | 69.7%  | 72.6%  | A1, A2, A3, G7         | +   | 8   |
| 69.2%  | 76.6%  | 74.6%  | 76.6%  | A2                     | +   | 10  |
| 69.2%  | 76.9%  | 71.1%  | 72.9%  | A3                     | +   | 65  |
| 69.2%  | 76.1%  | 63.8%  | 66.0%  | A5, G7                 | ×   | 6   |
| 69.2%  | 76.7%  | 75.0%  | 76.8%  | A2                     | +   | 27  |
| 69.2%  | 78.5%  | 74.7%  | 77.7%  | A1, G5                 | ×   | 5   |
| 69.2%  | 76.6%  | 74.5%  | 76.4%  | A2                     | +   | 32  |
| 69.2%  | 78.0%  | 66.2%  | 69.4%  | A2, A3, G1             | +   | 58  |
| 69.2%  | 76.5%  | 71.2%  | 71.7%  | A4                     | +   | 6   |
| 69.2%  | 76.6%  | 69.2%  | 70.1%  | A2, A4, A5             | +   | 65  |
| 69.2%  | 75.4%  | 81.0%  | 82.1%  | A2                     | +   | 68  |
| 69.2%  | 77.3%  | 66.0%  | 69.0%  | A3, G7                 | +   | 6   |
| 69.2%  | 77.9%  | 64.8%  | 68.5%  | A2, G5                 | ×   | 49  |
| 69.2%  | 77.8%  | 64.0%  | 67.7%  | A3, G5                 | ×   | 49  |
| 69.2%  | 76.7%  | 74.8%  | 76.7%  | A2                     | +   | 31  |
| 69.2%  | 78.0%  | 65.4%  | 68.9%  | A2, G3                 | +   | 58  |
| 69.2%  | 77.8%  | 64.1%  | 67.1%  | A2, A4, G7             | ×   | 49  |
| 69.2%  | 76.6%  | 74.4%  | 76.3%  | A2                     | +   | 34  |
| 69.1%  | 77.4%  | 63.2%  | 66.4%  | A2, A3, A4, G7         | +   | 49  |
| 69.1%  | 78.3%  | 76.5%  | 78.3%  | A1, A2, A5, G7         | ×   | 9   |
| 69.1%  | 76.9%  | 78.3%  | 79.5%  | A2                     | +   | 56  |
| 69.1%  | 77.2%  | 70.0%  | 71.8%  | A1, A2, A3, A4, A5     | +   | 65  |
| 69.1%  | 77.0%  | 63.6%  | 67.9%  | G3                     | +   | 60  |
| 69.1%  | 76.9%  | 66.0%  | 69.7%  | G1                     | +   | 69  |
| 69.1%  | 76.6%  | 74.5%  | 76.4%  | A2                     | +   | 35  |
| 69.1%  | 77.3%  | 69.8%  | 73.2%  | A1, G5                 | +   | 6   |
| 69.1%  | 75.2%  | 72.5%  | 75.6%  | G3                     | +   | 62  |
| 69.1%  | 76.4%  | 73.9%  | 74.3%  | A4                     | +   | 9   |
| 69.1%  | 77.6%  | 78.4%  | 80.2%  | A1, A2, A3, A4         | ×   | 9   |
| 69.0%  | 76.6%  | 74.4%  | 76.3%  | A2                     | +   | 36  |
| 69.0%  | 75.2%  | 72.4%  | 75.6%  | G3                     | +   | 63  |
| 69.0%  | 75.2%  | 72.6%  | 75.6%  | G3                     | +   | 64  |
| 69.0%  | 77.1%  | 75.6%  | 77.5%  | A1, A2, A3             | +   | 6   |
| 69.0%  | 77.6%  | 66.6%  | 69.6%  | A3, G7                 | ×   | 8   |
| 69.0%  | 77.8%  | 74.8%  | 77.1%  | A1, A2, A3, G7         | +   | 9   |
| 69.0%  | 76.3%  | 79.6%  | 80.8%  | A1, A2                 | +   | 1   |
| 69.0%  | 77.7%  | 67.9%  | 71.0%  | A2, G7                 | ×   | 8   |
| 69.0%  | 76.7%  | 74.8%  | 76.5%  | A2b                    | +   | 8   |
| 69.0%  | 77.6%  | 62.8%  | 66.5%  | A3, G5                 | +   | 49  |
| 69.0%  | 77.7%  | 72.6%  | 75.2%  | A1, A2, G7             | +   | 5   |
| 69.0%  | 77.5%  | 66.6%  | 69.8%  | A2, G7                 | +   | 6   |
| 69.0%  | 76.5%  | 78.3%  | 80.0%  | A2                     | +   | 57  |
| 68.9%  | 76.5%  | 78.2%  | 80.0%  | A2                     | +   | 9   |
| 68.9%  | 77.2%  | 76.4%  | 78.3%  | A1, A2, A3             | ×   | 6   |
| 68.9%  | 76.2%  | 59.7%  | 62.4%  | A5, G5                 | +   | 58  |
| 68.9%  | 77.5%  | 63.2%  | 66.3%  | A2, A4, G7             | ×   | 58  |
| 68.9%  | 76.9%  | 62.4%  | 66.6%  | G3                     | +   | 49  |
| 68.9%  | 77.7%  | 65.6%  | 68.6%  | A1, A2, A3, A4, A5, G7 | ×   | 49  |
| 68.9%  | 72.1%  | 85.3%  | 82.7%  | A1, A2, A3             | +   | 7   |
| 68.9%  | 77.6%  | 64.6%  | 67.8%  | A2, A3, A4, G7         | ×   | 49  |
| 68.9%  | 76.8%  | 65.5%  | 68.0%  | A2, A4                 | +   | 49  |

| S. Cls | S. Tot | C. Cls | C. Tot | CNNs                   | Op. | CRF |
|--------|--------|--------|--------|------------------------|-----|-----|
| 68.9%  | 78.1%  | 73.4%  | 76.1%  | A1, A2, G7             | ×   | 6   |
| 68.9%  | 76.4%  | 63.8%  | 67.9%  | G3                     | ×   | 61  |
| 68.9%  | 76.8%  | 63.1%  | 65.8%  | A2, A4, A5, G7         | ×   | 58  |
| 68.9%  | 74.9%  | 72.7%  | 75.7%  | G3                     | +   | 66  |
| 68.9%  | 73.0%  | 70.8%  | 69.0%  | A5                     | +   | 1   |
| 68.8%  | 76.5%  | 74.1%  | 76.0%  | A2                     | +   | 44  |
| 68.8%  | 76.9%  | 61.2%  | 64.4%  | A2, A4, G7             | +   | 58  |
| 68.8%  | 76.5%  | 78.3%  | 80.0%  | A2b                    | +   | 9   |
| 68.8%  | 75.9%  | 62.6%  | 65.1%  | A5, G7                 | ×   | 8   |
| 68.8%  | 74.6%  | 81.0%  | 82.1%  | A2                     | +   | 70  |
| 68.8%  | 77.1%  | 74.6%  | 76.5%  | A1, G7                 | ×   | 4   |
| 68.8%  | 77.0%  | 75.2%  | 77.0%  | A1, G7                 | ×   | 2   |
| 68.8%  | 74.5%  | 81.1%  | 82.1%  | A2                     | +   | 71  |
| 68.8%  | 77.6%  | 71.7%  | 74.7%  | A2, G7                 | ×   | 9   |
| 68.8%  | 78.0%  | 78.6%  | 80.0%  | A1, A2, A5             | ×   | 9   |
| 68.8%  | 76.6%  | 61.9%  | 64.8%  | A2, A3, A5, G7         | +   | 58  |
| 68.8%  | 74.6%  | 81.0%  | 82.1%  | A2                     | +   | 72  |
| 68.8%  | 77.0%  | 62.0%  | 65.3%  | A2, A3, A4, G7         | +   | 58  |
| 68.8%  | 76.5%  | 74.0%  | 75.8%  | A2                     | +   | 45  |
| 68.8%  | 76.4%  | 73.0%  | 75.2%  | A2                     | +   | 65  |
| 68.8%  | 74.6%  | 81.0%  | 82.0%  | A2                     | +   | 73  |
| 68.8%  | 74.6%  | 81.0%  | 82.0%  | A2                     | +   | 74  |
| 68.8%  | 76.3%  | 69.9%  | 70.6%  | A4                     | +   | 8   |
| 68.8%  | 76.9%  | 62.4%  | 65.5%  | A2, A5, G7             | ×   | 58  |
| 68.8%  | 77.1%  | 64.4%  | 68.7%  | G1                     | +   | 75  |
| 68.8%  | 77.1%  | 61.9%  | 65.2%  | A4, G5                 | ×   | 58  |
| 68.8%  | 78.2%  | 72.8%  | 76.0%  | A1, G5                 | ×   | 6   |
| 68.8%  | 77.0%  | 66.3%  | 68.8%  | A2, A4                 | ×   | 49  |
| 68.8%  | 76.4%  | 73.8%  | 75.7%  | A2                     | +   | 46  |
| 68.7%  | 74.6%  | 80.9%  | 82.0%  | A2                     | +   | 76  |
| 68.7%  | 74.5%  | 81.0%  | 82.1%  | A2                     | +   | 77  |
| 68.7%  | 77.8%  | 75.5%  | 78.5%  | A1, G5                 | ×   | 9   |
| 68.7%  | 76.6%  | 77.5%  | 79.3%  | A1, A2                 | +   | 5   |
| 68.7%  | 77.4%  | 63.3%  | 66.9%  | A3, G5                 | ×   | 58  |
| 68.7%  | 77.2%  | 63.3%  | 67.1%  | A2, G5                 | +   | 49  |
| 68.7%  | 72.2%  | 83.7%  | 82.0%  | A1, G3                 | +   | 7   |
| 68.7%  | 76.4%  | 73.7%  | 75.5%  | A2                     | +   | 47  |
| 68.7%  | 77.0%  | 64.6%  | 67.8%  | A3, G7                 | +   | 8   |
| 68.7%  | 74.1%  | 76.6%  | 79.0%  | G1                     | +   | 70  |
| 68.7%  | 76.1%  | 64.6%  | 66.5%  | A2, A5                 | +   | 49  |
| 68.7%  | 77.3%  | 77.1%  | 78.4%  | A1, A2, A5             | +   | 9   |
| 68.7%  | 78.0%  | 68.4%  | 71.9%  | A1, A2, G1             | ×   | 49  |
| 68.7%  | 77.4%  | 64.4%  | 67.9%  | A2, G5                 | ×   | 58  |
| 68.7%  | 74.1%  | 76.6%  | 79.0%  | G1                     | +   | 73  |
| 68.7%  | 74.1%  | 76.6%  | 79.0%  | G1                     | +   | 74  |
| 68.7%  | 76.4%  | 73.5%  | 75.4%  | A2                     | +   | 48  |
| 68.7%  | 77.1%  | 63.5%  | 66.6%  | A1, A2, A3, A4, A5, G7 | +   | 49  |
| 68.7%  | 74.4%  | 81.1%  | 82.3%  | A2                     | +   | 78  |
| 68.6%  | 76.8%  | 65.7%  | 67.9%  | A2, A5                 | ×   | 49  |
| 68.6%  | 77.4%  | 62.8%  | 66.2%  | A1, A2, A5, G7         | +   | 49  |
| 68.6%  | 76.7%  | 65.5%  | 68.2%  | A2, A3, A4             | +   | 49  |
| 68.6%  | 76.5%  | 78.8%  | 80.5%  | A1, A2                 | +   | 3   |
| 68.6%  | 73.3%  | 83.1%  | 81.7%  | A1, G5                 | ×   | 7   |
| 68.6%  | 74.0%  | 76.6%  | 79.0%  | G1                     | +   | 76  |
| 68.6%  | 77.4%  | 75.1%  | 77.1%  | A1, G7                 | ×   | 1   |
| 68.6%  | 76.5%  | 71.1%  | 73.5%  | A1, G7                 | +   | 1   |
| 68.6%  | 76.8%  | 73.6%  | 75.8%  | A1, A2, A3             | +   | 8   |
| 68.6%  | 75.8%  | 72.3%  | 74.5%  | A1, G7                 | +   | 2   |
| 68.6%  | 72.5%  | 82.5%  | 80.8%  | A1, G5                 | +   | 7   |

| S. Cls | S. Tot | C. Cls | C. Tot | CNNs               | Op. | CRF |
|--------|--------|--------|--------|--------------------|-----|-----|
| 68.6%  | 77.4%  | 70.1%  | 72.9%  | A3, G7             | ×   | 9   |
| 68.6%  | 74.4%  | 80.9%  | 82.0%  | A2                 | +   | 79  |
| 68.6%  | 74.0%  | 76.6%  | 79.0%  | G1                 | +   | 77  |
| 68.6%  | 76.5%  | 60.7%  | 63.6%  | A2, A5, G7         | +   | 58  |
| 68.6%  | 77.2%  | 64.9%  | 68.5%  | A2, G7             | +   | 8   |
| 68.6%  | 76.3%  | 59.4%  | 62.8%  | A4, G7             | +   | 49  |
| 68.6%  | 77.0%  | 68.1%  | 71.7%  | A1, G5             | +   | 8   |
| 68.6%  | 72.3%  | 85.2%  | 82.9%  | A1, A2, A3         | ×   | 7   |
| 68.5%  | 75.9%  | 71.8%  | 74.0%  | A1, G7             | +   | 4   |
| 68.5%  | 73.3%  | 69.8%  | 68.5%  | A5                 | +   | 3   |
| 68.5%  | 75.4%  | 63.3%  | 65.6%  | A5, G7             | +   | 9   |
| 68.5%  | 77.2%  | 63.9%  | 67.1%  | A2, A3, A4, G7     | ×   | 58  |
| 68.5%  | 76.9%  | 74.6%  | 76.8%  | A1, A2, A3         | ×   | 8   |
| 68.5%  | 74.4%  | 72.7%  | 75.7%  | G3                 | +   | 68  |
| 68.5%  | 73.5%  | 68.7%  | 67.6%  | A5                 | +   | 5   |
| 68.5%  | 76.3%  | 71.8%  | 73.7%  | A2                 | +   | 54  |
| 68.5%  | 76.4%  | 66.7%  | 69.6%  | A2, A3             | ×   | 49  |
| 68.5%  | 74.0%  | 80.9%  | 81.8%  | A2                 | +   | 80  |
| 68.5%  | 76.1%  | 68.6%  | 69.4%  | A4                 | +   | 65  |
| 68.5%  | 76.5%  | 60.6%  | 63.6%  | A5, G5             | ×   | 58  |
| 68.5%  | 77.0%  | 72.8%  | 75.9%  | A1, G5             | +   | 9   |
| 68.5%  | 72.8%  | 84.0%  | 82.6%  | A1, G3             | ×   | 7   |
| 68.5%  | 73.9%  | 76.4%  | 78.8%  | G1                 | +   | 79  |
| 68.5%  | 74.3%  | 80.8%  | 81.8%  | A2                 | +   | 81  |
| 68.5%  | 76.6%  | 61.7%  | 66.1%  | G3                 | +   | 58  |
| 68.5%  | 76.6%  | 78.1%  | 79.9%  | A1, A2             | ×   | 5   |
| 68.5%  | 76.6%  | 65.1%  | 67.4%  | A2, A3, A5         | +   | 49  |
| 68.5%  | 76.3%  | 66.5%  | 69.4%  | A2, A3             | +   | 49  |
| 68.4%  | 75.1%  | 79.1%  | 80.0%  | A1, A2             | +   | 2   |
| 68.4%  | 77.8%  | 71.6%  | 74.5%  | A1, A2, G7         | ×   | 8   |
| 68.4%  | 74.4%  | 80.8%  | 82.0%  | A2                 | +   | 82  |
| 68.4%  | 77.3%  | 70.3%  | 73.4%  | A1, A2, G7         | +   | 6   |
| 68.4%  | 77.8%  | 68.4%  | 71.7%  | A1, A2, G1         | ×   | 58  |
| 68.4%  | 77.4%  | 63.6%  | 67.1%  | A1, A2, A3, A4, G7 | +   | 49  |
| 68.4%  | 77.3%  | 76.2%  | 78.8%  | A1, A2, G7         | ×   | 9   |
| 68.4%  | 76.2%  | 71.4%  | 73.8%  | A2                 | +   | 51  |
| 68.4%  | 73.5%  | 76.4%  | 78.7%  | G1                 | +   | 80  |
| 68.4%  | 76.5%  | 78.3%  | 80.1%  | A1, A2, A3         | +   | 9   |
| 68.4%  | 77.4%  | 64.3%  | 67.3%  | A2, A3, A5, G7     | ×   | 49  |
| 68.4%  | 76.3%  | 75.8%  | 77.8%  | A1, A2             | +   | 6   |
| 68.4%  | 77.8%  | 65.2%  | 68.4%  | A1, A2, A5, G7     | ×   | 49  |
| 68.4%  | 76.2%  | 79.8%  | 81.2%  | A1, A2             | ×   | 1   |
| 68.4%  | 76.8%  | 78.9%  | 80.7%  | A1, A2, A3         | ×   | 9   |
| 68.4%  | 77.6%  | 64.1%  | 67.7%  | A2, A3, G7         | ×   | 49  |
| 68.4%  | 75.2%  | 58.3%  | 61.0%  | A5, G7             | +   | 49  |
| 68.4%  | 76.6%  | 65.6%  | 68.6%  | A1, A2, A3, A4     | +   | 49  |
| 68.3%  | 76.5%  | 79.2%  | 81.0%  | A1, A2             | ×   | 3   |
| 68.3%  | 75.1%  | 78.3%  | 79.3%  | A1, A2             | +   | 4   |
| 68.3%  | 76.2%  | 66.4%  | 69.0%  | A2, A3             | +   | 58  |
| 68.3%  | 76.8%  | 67.6%  | 70.8%  | A3, G7             | +   | 9   |
| 68.3%  | 77.7%  | 65.7%  | 68.9%  | A1, A2, A3, A4, G7 | ×   | 49  |
| 68.3%  | 73.7%  | 76.6%  | 79.0%  | G1                 | +   | 78  |
| 68.3%  | 76.8%  | 66.1%  | 68.5%  | A2, A4             | ×   | 58  |
| 68.3%  | 75.9%  | 69.9%  | 73.7%  | G3                 | +   | 67  |
| 68.3%  | 76.4%  | 64.9%  | 67.4%  | A2, A4             | +   | 58  |
| 68.3%  | 76.6%  | 60.2%  | 63.7%  | A4, G7             | ×   | 49  |
| 68.3%  | 73.5%  | 82.2%  | 80.9%  | A1, G7             | ×   | 7   |
| 68.3%  | 76.4%  | 66.7%  | 69.3%  | A2, A3             | ×   | 58  |
| 68.3%  | 77.9%  | 71.1%  | 74.4%  | A1, G5             | ×   | 8   |

| S. Cls | S. Tot | C. Cls | C. Tot | CNNs                   | Op. | CRF |
|--------|--------|--------|--------|------------------------|-----|-----|
| 68.3%  | 77.0%  | 61.9%  | 65.6%  | A3, G5                 | +   | 58  |
| 68.3%  | 72.2%  | 71.8%  | 69.8%  | A5                     | +   | 2   |
| 68.3%  | 72.3%  | 71.6%  | 69.6%  | A5                     | +   | 4   |
| 68.3%  | 73.9%  | 76.5%  | 79.0%  | G1                     | +   | 82  |
| 68.3%  | 77.3%  | 66.6%  | 69.2%  | A1, A2, A3, A4, A5     | ×   | 49  |
| 68.3%  | 76.7%  | 66.1%  | 68.8%  | A2, A3, A4             | ×   | 49  |
| 68.3%  | 76.5%  | 64.7%  | 67.5%  | A1, A2, A5             | +   | 49  |
| 68.2%  | 77.4%  | 66.6%  | 70.3%  | A1, A2, G1             | +   | 49  |
| 68.2%  | 75.9%  | 64.9%  | 67.0%  | A5, G7                 | ×   | 9   |
| 68.2%  | 76.7%  | 65.9%  | 68.4%  | A2, A3, A4             | ×   | 58  |
| 68.2%  | 73.3%  | 67.2%  | 66.5%  | A5                     | +   | 6   |
| 68.2%  | 77.2%  | 65.0%  | 67.8%  | A1, A2, A3, A4, A5, G7 | ×   | 58  |
| 68.2%  | 75.9%  | 63.9%  | 65.6%  | A2, A5                 | +   | 58  |
| 68.2%  | 76.9%  | 66.0%  | 68.3%  | A2, A3, A5             | ×   | 49  |
| 68.2%  | 77.1%  | 66.8%  | 69.5%  | A1, A2, A5             | ×   | 49  |
| 68.2%  | 76.6%  | 71.7%  | 74.4%  | A1, A2, A3             | +   | 65  |
| 68.2%  | 77.1%  | 62.6%  | 66.3%  | A2, A3, G7             | +   | 49  |
| 68.2%  | 76.8%  | 62.5%  | 66.2%  | A2, G5                 | +   | 58  |
| 68.2%  | 77.9%  | 68.1%  | 71.9%  | A1, G1                 | ×   | 49  |
| 68.2%  | 73.6%  | 81.0%  | 81.9%  | A2                     | +   | 83  |
| 68.2%  | 77.2%  | 65.4%  | 69.1%  | A1, G3                 | +   | 49  |
| 68.2%  | 75.9%  | 58.2%  | 61.5%  | A4, G7                 | +   | 58  |
| 68.1%  | 71.4%  | 83.8%  | 82.3%  | A1, G1                 | +   | 7   |
| 68.1%  | 76.3%  | 76.3%  | 78.4%  | A1, A2                 | ×   | 6   |
| 68.1%  | 76.6%  | 65.2%  | 67.4%  | A2, A4, A5             | ×   | 49  |
| 68.1%  | 75.2%  | 79.2%  | 80.2%  | A1, A2                 | ×   | 2   |
| 68.1%  | 75.9%  | 64.6%  | 66.4%  | A2, A4, A5             | +   | 49  |
| 68.1%  | 76.5%  | 65.2%  | 67.7%  | A2, A3, A4             | +   | 58  |
| 68.1%  | 77.4%  | 66.4%  | 70.2%  | A1, G1                 | +   | 49  |
| 68.1%  | 76.4%  | 62.5%  | 65.5%  | A1, A2, A3, A4, A5, G7 | +   | 58  |
| 68.1%  | 76.6%  | 72.6%  | 75.4%  | A1, A2, A3             | ×   | 65  |
| 68.1%  | 76.9%  | 73.1%  | 75.8%  | A1, A2, G7             | +   | 9   |
| 68.1%  | 77.6%  | 68.2%  | 71.7%  | A1, G1                 | ×   | 58  |
| 68.1%  | 75.2%  | 78.4%  | 79.5%  | A1, A2                 | ×   | 4   |
| 68.0%  | 76.0%  | 73.9%  | 76.3%  | A1, A2                 | +   | 8   |
| 68.0%  | 76.5%  | 64.8%  | 67.5%  | A1, A2, A3, A4, A5     | +   | 49  |
| 68.0%  | 76.5%  | 65.4%  | 67.4%  | A2, A5                 | ×   | 58  |
| 68.0%  | 77.1%  | 73.7%  | 76.4%  | A1, G7                 | ×   | 3   |
| 68.0%  | 76.9%  | 63.5%  | 66.5%  | A2, A3, A5, G7         | ×   | 58  |
| 68.0%  | 74.3%  | 62.1%  | 65.5%  | G5                     | +   | 33  |
| 68.0%  | 75.9%  | 66.0%  | 70.2%  | G1                     | +   | 84  |
| 68.0%  | 76.7%  | 61.7%  | 65.0%  | A1, A2, A5, G7         | +   | 58  |
| 68.0%  | 75.9%  | 65.9%  | 70.1%  | G1                     | +   | 85  |
| 68.0%  | 71.9%  | 84.0%  | 82.7%  | A1, G1                 | ×   | 7   |
| 67.9%  | 76.8%  | 68.7%  | 71.9%  | A2, G7                 | +   | 9   |
| 67.9%  | 73.5%  | 73.1%  | 75.8%  | G3                     | +   | 70  |
| 67.9%  | 77.1%  | 63.6%  | 67.2%  | A2, A3, G7             | ×   | 58  |
| 67.9%  | 76.4%  | 65.0%  | 67.9%  | A1, A2, A3, A4         | +   | 58  |
| 67.9%  | 77.1%  | 72.1%  | 74.9%  | A1, G7                 | ×   | 5   |
| 67.9%  | 75.9%  | 65.6%  | 69.8%  | G1                     | +   | 86  |
| 67.9%  | 76.1%  | 66.0%  | 68.7%  | A3                     | +   | 49  |
| 67.9%  | 73.4%  | 73.0%  | 75.7%  | G3                     | +   | 73  |
| 67.9%  | 73.4%  | 73.0%  | 75.7%  | G3                     | +   | 74  |
| 67.9%  | 76.3%  | 64.5%  | 66.5%  | A2, A3, A5             | +   | 58  |
| 67.9%  | 76.9%  | 62.8%  | 66.1%  | A1, A2, A3, A4, G7     | +   | 58  |
| 67.9%  | 77.0%  | 68.2%  | 71.6%  | A1, A2, G7             | +   | 8   |
| 67.9%  | 76.0%  | 65.3%  | 69.6%  | G1                     | +   | 87  |
| 67.9%  | 73.4%  | 72.9%  | 75.7%  | G3                     | +   | 76  |
| 67.9%  | 73.1%  | 66.0%  | 65.5%  | A5                     | +   | 8   |

| S. Cls | S. Tot | C. Cls | C. Tot | CNNs               | Op. | CRF |
|--------|--------|--------|--------|--------------------|-----|-----|
| 67.9%  | 74.5%  | 64.3%  | 67.8%  | G5                 | +   | 21  |
| 67.9%  | 77.2%  | 66.3%  | 69.8%  | A1, G1             | +   | 58  |
| 67.9%  | 73.4%  | 73.1%  | 75.7%  | G3                 | +   | 77  |
| 67.9%  | 77.2%  | 65.5%  | 69.0%  | A1, A2, A3, G7     | ×   | 49  |
| 67.9%  | 76.1%  | 59.4%  | 62.7%  | A4, G7             | ×   | 58  |
| 67.9%  | 75.8%  | 70.3%  | 72.6%  | A2                 | +   | 60  |
| 67.8%  | 76.0%  | 65.1%  | 69.4%  | G1                 | +   | 88  |
| 67.8%  | 76.1%  | 65.9%  | 68.3%  | A3                 | +   | 58  |
| 67.8%  | 77.1%  | 66.3%  | 69.8%  | A1, A2, G1         | +   | 58  |
| 67.8%  | 72.2%  | 81.6%  | 79.8%  | A1, G7             | +   | 7   |
| 67.8%  | 76.1%  | 69.4%  | 72.5%  | A1, G7             | +   | 3   |
| 67.8%  | 76.7%  | 65.7%  | 67.9%  | A2, A3, A5         | ×   | 58  |
| 67.8%  | 76.8%  | 65.1%  | 68.7%  | A1, G3             | +   | 58  |
| 67.8%  | 72.9%  | 69.5%  | 68.8%  | A5                 | +   | 9   |
| 67.8%  | 76.2%  | 67.6%  | 71.0%  | A1, G7             | +   | 5   |
| 67.8%  | 76.0%  | 64.7%  | 69.2%  | G1                 | +   | 89  |
| 67.8%  | 73.3%  | 72.7%  | 75.5%  | G3                 | +   | 79  |
| 67.8%  | 77.4%  | 64.6%  | 67.6%  | A1, A2, A5, G7     | ×   | 58  |
| 67.8%  | 74.3%  | 63.4%  | 66.9%  | G5                 | +   | 3   |
| 67.8%  | 74.3%  | 63.4%  | 66.9%  | G5                 | +   | 38  |
| 67.8%  | 74.3%  | 63.4%  | 66.9%  | G5                 | +   | 39  |
| 67.8%  | 74.3%  | 63.4%  | 66.9%  | G5                 | +   | 41  |
| 67.7%  | 77.5%  | 67.1%  | 71.0%  | A1, G3             | ×   | 49  |
| 67.7%  | 76.6%  | 66.7%  | 69.7%  | A1, A2, A3, A4     | ×   | 49  |
| 67.7%  | 75.6%  | 63.9%  | 65.6%  | A2, A4, A5         | +   | 58  |
| 67.7%  | 74.7%  | 57.0%  | 59.7%  | A5, G7             | +   | 58  |
| 67.7%  | 76.3%  | 65.0%  | 66.7%  | A2, A4, A5         | ×   | 58  |
| 67.7%  | 72.8%  | 76.4%  | 78.7%  | G1                 | +   | 83  |
| 67.7%  | 73.2%  | 73.1%  | 75.8%  | G3                 | +   | 78  |
| 67.7%  | 73.4%  | 72.9%  | 75.8%  | G3                 | +   | 82  |
| 67.7%  | 76.0%  | 74.6%  | 77.1%  | A1, A2             | ×   | 8   |
| 67.7%  | 75.8%  | 72.3%  | 74.9%  | A1, A2             | +   | 65  |
| 67.7%  | 77.2%  | 65.3%  | 68.5%  | A1, A2, A3, A4, G7 | ×   | 58  |
| 67.7%  | 76.0%  | 64.2%  | 68.8%  | G1                 | +   | 90  |
| 67.7%  | 75.3%  | 59.1%  | 62.0%  | A5, G7             | ×   | 49  |
| 67.7%  | 70.3%  | 83.7%  | 81.0%  | A2b                | +   | 7   |
| 67.7%  | 74.5%  | 60.9%  | 64.6%  | G5                 | +   | 37  |
| 67.7%  | 70.4%  | 83.8%  | 81.2%  | A2                 | +   | 7   |
| 67.7%  | 73.9%  | 64.2%  | 67.3%  | G5                 | +   | 43  |
| 67.6%  | 75.0%  | 61.1%  | 65.1%  | G3                 | +   | 69  |
| 67.6%  | 76.6%  | 61.5%  | 65.3%  | A3, G7             | ×   | 49  |
| 67.6%  | 74.4%  | 63.9%  | 67.5%  | G5                 | +   | 18  |
| 67.6%  | 76.5%  | 61.5%  | 65.2%  | A2, A3, G7         | +   | 58  |
| 67.6%  | 68.9%  | 77.5%  | 72.4%  | A5                 | +   | 7   |
| 67.6%  | 76.2%  | 64.1%  | 66.7%  | A1, A2, A3, A4, A5 | +   | 58  |
| 67.6%  | 73.0%  | 65.0%  | 64.6%  | A5                 | +   | 65  |
| 67.6%  | 75.9%  | 63.8%  | 68.4%  | G1                 | +   | 91  |
| 67.6%  | 76.7%  | 63.4%  | 67.1%  | A1, A2, A3, G7     | +   | 49  |
| 67.6%  | 75.2%  | 78.0%  | 79.7%  | A2                 | +   | 67  |
| 67.6%  | 74.4%  | 63.9%  | 67.4%  | G5                 | +   | 19  |
| 67.6%  | 75.9%  | 63.7%  | 68.4%  | G1                 | +   | 92  |
| 67.6%  | 74.4%  | 63.9%  | 67.4%  | G5                 | +   | 20  |
| 67.6%  | 75.9%  | 64.0%  | 66.7%  | A1, A2, A5         | +   | 58  |
| 67.6%  | 75.9%  | 63.6%  | 68.3%  | G1                 | +   | 93  |
| 67.6%  | 72.7%  | 72.6%  | 75.2%  | G3                 | +   | 80  |
| 67.5%  | 74.3%  | 64.0%  | 67.5%  | G5                 | +   | 42  |
| 67.5%  | 75.9%  | 63.6%  | 68.2%  | G1                 | +   | 94  |
| 67.5%  | 74.4%  | 64.0%  | 67.6%  | G5                 | +   | 28  |
| 67.5%  | 74.6%  | 61.1%  | 65.2%  | G5                 | +   | 12  |

| S. Cls | S. Tot | C. Cls | C. Tot | CNNs               | Op. | CRF |
|--------|--------|--------|--------|--------------------|-----|-----|
| 67.5%  | 77.0%  | 65.9%  | 68.4%  | A1, A2, A3, A4, A5 | ×   | 58  |
| 67.5%  | 73.5%  | 64.3%  | 67.5%  | G5                 | +   | 1   |
| 67.5%  | 73.5%  | 64.3%  | 67.5%  | G5                 | +   | 53  |
| 67.5%  | 74.4%  | 61.9%  | 65.7%  | G5                 | +   | 26  |
| 67.5%  | 76.7%  | 66.2%  | 68.8%  | A1, A2, A5         | ×   | 58  |
| 67.5%  | 72.6%  | 80.8%  | 81.6%  | A2                 | +   | 95  |
| 67.5%  | 77.2%  | 66.9%  | 70.5%  | A1, G3             | ×   | 58  |
| 67.5%  | 76.2%  | 59.9%  | 63.9%  | A3, G7             | +   | 49  |
| 67.5%  | 72.6%  | 80.8%  | 81.6%  | A2                 | +   | 96  |
| 67.4%  | 74.1%  | 63.5%  | 67.0%  | G5                 | +   | 40  |
| 67.4%  | 76.8%  | 70.2%  | 73.3%  | A1, G7             | ×   | 6   |
| 67.4%  | 73.9%  | 65.0%  | 68.5%  | G5                 | +   | 52  |
| 67.4%  | 76.4%  | 66.6%  | 69.4%  | A1, A2, A3, A4     | ×   | 58  |
| 67.4%  | 74.6%  | 62.6%  | 66.3%  | G5                 | +   | 5   |
| 67.4%  | 74.6%  | 62.6%  | 66.3%  | G5                 | +   | 11  |
| 67.4%  | 76.6%  | 62.2%  | 66.2%  | A2, G7             | ×   | 49  |
| 67.4%  | 74.6%  | 62.7%  | 66.4%  | G5                 | +   | 13  |
| 67.4%  | 74.4%  | 62.8%  | 66.5%  | G5                 | +   | 15  |
| 67.4%  | 73.9%  | 65.2%  | 68.6%  | G5                 | +   | 55  |
| 67.4%  | 72.5%  | 80.8%  | 81.6%  | A2                 | +   | 97  |
| 67.4%  | 75.5%  | 67.2%  | 70.2%  | A2                 | +   | 49  |
| 67.4%  | 73.8%  | 65.2%  | 68.6%  | G5                 | +   | 59  |
| 67.4%  | 75.3%  | 64.2%  | 68.4%  | G3                 | +   | 84  |
| 67.3%  | 75.8%  | 78.1%  | 80.1%  | A1, A2             | +   | 9   |
| 67.3%  | 75.3%  | 64.1%  | 68.3%  | G3                 | +   | 85  |
| 67.3%  | 75.3%  | 64.0%  | 66.0%  | A4                 | +   | 49  |
| 67.3%  | 75.8%  | 73.0%  | 75.6%  | A1, A2             | ×   | 65  |
| 67.3%  | 75.8%  | 65.7%  | 69.3%  | A1, G7             | +   | 6   |
| 67.3%  | 75.3%  | 63.9%  | 68.2%  | G3                 | +   | 86  |
| 67.3%  | 72.3%  | 80.8%  | 81.7%  | A2                 | +   | 98  |
| 67.3%  | 75.6%  | 67.2%  | 70.1%  | A2b                | +   | 49  |
| 67.3%  | 76.2%  | 60.2%  | 64.4%  | A2, G7             | +   | 49  |
| 67.2%  | 75.4%  | 63.6%  | 67.9%  | G3                 | +   | 87  |
| 67.2%  | 75.8%  | 78.6%  | 80.7%  | A1, A2             | ×   | 9   |
| 67.2%  | 75.4%  | 63.3%  | 67.7%  | G3                 | +   | 88  |
| 67.2%  | 74.6%  | 61.4%  | 65.3%  | G5                 | +   | 6   |
| 67.2%  | 74.6%  | 61.4%  | 65.3%  | G5                 | +   | 14  |
| 67.2%  | 74.6%  | 61.5%  | 65.4%  | G5                 | +   | 17  |
| 67.2%  | 74.4%  | 59.4%  | 63.6%  | G5                 | +   | 44  |
| 67.2%  | 72.4%  | 73.0%  | 75.5%  | G3                 | +   | 83  |
| 67.2%  | 74.4%  | 59.3%  | 63.5%  | G5                 | +   | 45  |
| 67.2%  | 74.4%  | 59.2%  | 63.4%  | G5                 | +   | 46  |
| 67.2%  | 74.5%  | 61.6%  | 65.5%  | G5                 | +   | 16  |
| 67.1%  | 74.4%  | 59.2%  | 63.3%  | G5                 | +   | 47  |
| 67.1%  | 75.4%  | 67.3%  | 70.0%  | A2                 | +   | 58  |
| 67.1%  | 75.4%  | 62.9%  | 67.4%  | G3                 | +   | 89  |
| 67.1%  | 74.4%  | 59.0%  | 63.2%  | G5                 | +   | 48  |
| 67.1%  | 76.6%  | 65.2%  | 68.5%  | A1, A2, A3, G7     | ×   | 58  |
| 67.1%  | 72.7%  | 65.4%  | 68.1%  | G5                 | +   | 4   |
| 67.1%  | 74.5%  | 60.6%  | 64.7%  | G5                 | +   | 10  |
| 67.1%  | 75.4%  | 62.6%  | 67.1%  | G3                 | +   | 90  |
| 67.0%  | 75.3%  | 67.6%  | 70.1%  | A2b                | +   | 58  |
| 67.0%  | 76.1%  | 60.4%  | 64.3%  | A3, G7             | ×   | 58  |
| 67.0%  | 74.5%  | 60.5%  | 64.6%  | G5                 | +   | 24  |
| 67.0%  | 74.5%  | 60.6%  | 64.6%  | G5                 | +   | 27  |
| 67.0%  | 74.5%  | 60.5%  | 64.5%  | G5                 | +   | 25  |
| 67.0%  | 76.5%  | 68.4%  | 71.6%  | A1, G7             | ×   | 8   |
| 67.0%  | 75.1%  | 63.5%  | 65.3%  | A4                 | +   | 58  |
| 67.0%  | 74.8%  | 57.8%  | 60.7%  | A5, G7             | ×   | 58  |



| S. Cls | S. Tot | C. Cls | C. Tot | CNNs           | Op. | CRF |
|--------|--------|--------|--------|----------------|-----|-----|
| 67.0%  | 75.4%  | 62.2%  | 66.8%  | G3             | +   | 91  |
| 67.0%  | 74.4%  | 60.7%  | 64.7%  | G5             | +   | 22  |
| 66.9%  | 74.5%  | 60.5%  | 64.6%  | G5             | +   | 31  |
| 66.9%  | 75.4%  | 62.1%  | 66.8%  | G3             | +   | 92  |
| 66.9%  | 75.7%  | 66.1%  | 69.3%  | A1, A2, A3     | +   | 49  |
| 66.9%  | 74.5%  | 60.4%  | 64.4%  | G5             | +   | 8   |
| 66.9%  | 74.4%  | 60.6%  | 64.6%  | G5             | +   | 23  |
| 66.9%  | 72.5%  | 61.9%  | 62.0%  | A5             | +   | 49  |
| 66.9%  | 76.1%  | 62.6%  | 66.2%  | A1, A2, A3, G7 | +   | 58  |
| 66.9%  | 73.5%  | 62.0%  | 65.6%  | G5             | +   | 56  |
| 66.9%  | 75.4%  | 62.0%  | 66.7%  | G3             | +   | 93  |
| 66.9%  | 74.4%  | 60.3%  | 64.3%  | G5             | +   | 32  |
| 66.9%  | 75.3%  | 62.0%  | 66.6%  | G3             | +   | 94  |
| 66.9%  | 74.5%  | 60.4%  | 64.4%  | G5             | +   | 35  |
| 66.9%  | 73.0%  | 66.1%  | 69.3%  | G5             | +   | 62  |
| 66.9%  | 74.4%  | 60.2%  | 64.3%  | G5             | +   | 34  |
| 66.9%  | 74.4%  | 60.5%  | 64.5%  | G5             | +   | 29  |
| 66.9%  | 74.5%  | 60.3%  | 64.3%  | G5             | +   | 36  |
| 66.9%  | 74.4%  | 60.4%  | 64.4%  | G5             | +   | 30  |
| 66.9%  | 73.0%  | 66.2%  | 69.4%  | G5             | +   | 64  |
| 66.9%  | 74.1%  | 62.8%  | 66.8%  | G5             | +   | 50  |
| 66.9%  | 72.4%  | 65.6%  | 68.3%  | G5             | +   | 2   |
| 66.9%  | 75.6%  | 71.8%  | 73.6%  | A2             | +   | 61  |
| 66.9%  | 75.8%  | 66.9%  | 70.2%  | A1, A2, A3     | ×   | 49  |
| 66.8%  | 76.0%  | 62.5%  | 66.5%  | A1, G5         | +   | 49  |
| 66.8%  | 75.5%  | 64.2%  | 68.1%  | A1, G7         | +   | 8   |
| 66.8%  | 72.9%  | 66.1%  | 69.2%  | G5             | +   | 63  |
| 66.8%  | 75.6%  | 58.9%  | 62.7%  | A3, G7         | +   | 58  |
| 66.8%  | 76.0%  | 61.4%  | 65.3%  | A2, G7         | ×   | 58  |
| 66.8%  | 72.8%  | 66.2%  | 69.3%  | G5             | +   | 66  |
| 66.8%  | 71.5%  | 76.2%  | 78.3%  | G1             | +   | 95  |
| 66.7%  | 71.5%  | 76.1%  | 78.3%  | G1             | +   | 96  |
| 66.7%  | 76.6%  | 64.8%  | 68.6%  | A1, A2, G7     | ×   | 49  |
| 66.7%  | 75.5%  | 65.9%  | 68.9%  | A1, A2, A3     | +   | 58  |
| 66.7%  | 76.3%  | 72.5%  | 75.4%  | A1, G7         | ×   | 9   |
| 66.7%  | 74.2%  | 58.8%  | 63.0%  | G5             | +   | 54  |
| 66.6%  | 71.4%  | 76.1%  | 78.3%  | G1             | +   | 97  |
| 66.6%  | 75.7%  | 63.0%  | 67.5%  | G1             | +   | 99  |
| 66.6%  | 74.1%  | 57.5%  | 61.8%  | G5             | +   | 60  |
| 66.6%  | 76.8%  | 64.8%  | 68.6%  | A1, G5         | ×   | 49  |
| 66.6%  | 68.7%  | 79.1%  | 77.6%  | G1             | +   | 7   |
| 66.5%  | 75.2%  | 68.3%  | 71.7%  | A1, G7         | +   | 9   |
| 66.5%  | 75.5%  | 66.8%  | 70.0%  | A1, A2, A3     | ×   | 58  |
| 66.5%  | 69.0%  | 76.0%  | 75.0%  | G3             | +   | 7   |
| 66.5%  | 74.3%  | 58.7%  | 63.0%  | G5             | +   | 51  |
| 66.5%  | 69.8%  | 84.1%  | 81.6%  | A1, A2         | +   | 7   |
| 66.4%  | 75.5%  | 58.9%  | 63.1%  | A2, G7         | +   | 58  |
| 66.4%  | 71.1%  | 76.1%  | 78.2%  | G1             | +   | 98  |
| 66.4%  | 72.3%  | 66.5%  | 69.5%  | G5             | +   | 68  |
| 66.4%  | 75.3%  | 60.4%  | 65.1%  | G3             | +   | 75  |
| 66.4%  | 76.0%  | 62.2%  | 66.3%  | A1, A2, G7     | +   | 49  |
| 66.4%  | 71.3%  | 73.0%  | 75.4%  | G3             | +   | 95  |
| 66.4%  | 73.7%  | 67.8%  | 70.3%  | A2             | +   | 84  |
| 66.4%  | 71.3%  | 73.0%  | 75.4%  | G3             | +   | 96  |
| 66.3%  | 73.7%  | 67.5%  | 70.1%  | A2             | +   | 85  |
| 66.3%  | 75.0%  | 66.4%  | 69.5%  | A1, A2         | +   | 49  |
| 66.3%  | 71.2%  | 73.0%  | 75.4%  | G3             | +   | 97  |
| 66.3%  | 73.7%  | 67.2%  | 69.9%  | A2             | +   | 86  |
| 66.2%  | 73.7%  | 66.9%  | 69.7%  | A2             | +   | 87  |

| S. Cls | S. Tot | C. Cls | C. Tot | CNNs       | Op. | CRF |
|--------|--------|--------|--------|------------|-----|-----|
| 66.2%  | 75.4%  | 61.6%  | 65.7%  | A1, G5     | +   | 58  |
| 66.2%  | 71.0%  | 73.0%  | 75.4%  | G3         | +   | 98  |
| 66.2%  | 73.7%  | 66.6%  | 69.4%  | A2         | +   | 88  |
| 66.1%  | 73.2%  | 56.8%  | 60.8%  | G5         | +   | 61  |
| 66.1%  | 73.6%  | 66.3%  | 69.1%  | A2         | +   | 89  |
| 66.1%  | 74.5%  | 59.1%  | 63.9%  | G3         | +   | 99  |
| 66.1%  | 69.8%  | 84.0%  | 81.6%  | A1, A2     | ×   | 7   |
| 66.0%  | 76.2%  | 64.5%  | 68.1%  | A1, G5     | ×   | 58  |
| 66.0%  | 73.9%  | 62.7%  | 66.7%  | G5         | +   | 57  |
| 66.0%  | 73.9%  | 62.7%  | 66.7%  | G5         | +   | 9   |
| 66.0%  | 71.9%  | 61.0%  | 61.1%  | A5         | +   | 58  |
| 66.0%  | 75.0%  | 67.0%  | 70.3%  | A1, A2     | ×   | 49  |
| 66.0%  | 73.6%  | 65.8%  | 68.8%  | A2         | +   | 90  |
| 66.0%  | 71.6%  | 66.9%  | 69.8%  | G5         | +   | 70  |
| 65.9%  | 71.5%  | 66.9%  | 69.7%  | G5         | +   | 73  |
| 65.9%  | 71.5%  | 66.9%  | 69.7%  | G5         | +   | 74  |
| 65.9%  | 71.5%  | 66.9%  | 69.7%  | G5         | +   | 76  |
| 65.9%  | 71.5%  | 67.1%  | 69.8%  | G5         | +   | 77  |
| 65.9%  | 74.0%  | 56.9%  | 61.4%  | G5         | +   | 49  |
| 65.9%  | 74.6%  | 66.2%  | 69.2%  | A1, A2     | +   | 58  |
| 65.8%  | 73.5%  | 65.3%  | 68.4%  | A2         | +   | 91  |
| 65.8%  | 73.5%  | 65.3%  | 68.4%  | A2         | +   | 92  |
| 65.8%  | 74.3%  | 69.6%  | 71.3%  | A2         | +   | 69  |
| 65.8%  | 71.3%  | 66.8%  | 69.8%  | G5         | +   | 78  |
| 65.8%  | 76.0%  | 64.2%  | 68.0%  | A1, A2, G7 | ×   | 58  |
| 65.8%  | 73.5%  | 65.1%  | 68.2%  | A2         | +   | 93  |
| 65.8%  | 71.6%  | 66.7%  | 69.9%  | G5         | +   | 82  |
| 65.8%  | 71.3%  | 66.6%  | 69.5%  | G5         | +   | 79  |
| 65.8%  | 73.5%  | 65.0%  | 68.2%  | A2         | +   | 94  |
| 65.7%  | 75.3%  | 61.3%  | 65.3%  | A1, A2, G7 | +   | 58  |
| 65.7%  | 74.7%  | 67.2%  | 70.2%  | A1, A2     | ×   | 58  |
| 65.7%  | 73.6%  | 60.8%  | 65.1%  | G5         | +   | 84  |
| 65.7%  | 73.8%  | 56.2%  | 60.6%  | G5         | +   | 58  |
| 65.6%  | 73.7%  | 60.7%  | 65.0%  | G5         | +   | 85  |
| 65.6%  | 73.7%  | 60.4%  | 64.8%  | G5         | +   | 86  |
| 65.6%  | 73.7%  | 60.3%  | 64.6%  | G5         | +   | 87  |
| 65.5%  | 74.7%  | 59.5%  | 63.9%  | A1, G7     | +   | 49  |
| 65.5%  | 73.7%  | 60.0%  | 64.4%  | G5         | +   | 88  |
| 65.5%  | 70.7%  | 66.8%  | 69.4%  | G5         | +   | 80  |
| 65.4%  | 73.7%  | 59.7%  | 64.2%  | G5         | +   | 89  |
| 65.4%  | 72.8%  | 76.3%  | 78.3%  | A1         | +   | 5   |
| 65.4%  | 75.5%  | 62.5%  | 66.3%  | A1, G7     | ×   | 49  |
| 65.4%  | 73.7%  | 59.4%  | 63.9%  | G5         | +   | 90  |
| 65.3%  | 70.6%  | 67.1%  | 69.8%  | G5         | +   | 83  |
| 65.3%  | 72.9%  | 77.2%  | 79.1%  | A1         | +   | 3   |
| 65.3%  | 73.7%  | 59.0%  | 63.6%  | G5         | +   | 91  |
| 65.3%  | 73.7%  | 58.9%  | 63.5%  | G5         | +   | 92  |
| 65.2%  | 73.6%  | 58.8%  | 63.4%  | G5         | +   | 93  |
| 65.2%  | 73.9%  | 66.1%  | 69.2%  | A2         | +   | 75  |
| 65.2%  | 73.6%  | 58.8%  | 63.4%  | G5         | +   | 94  |
| 65.2%  | 72.6%  | 75.1%  | 76.9%  | A1         | +   | 6   |
| 65.2%  | 68.0%  | 70.7%  | 70.0%  | G5         | +   | 7   |
| 64.9%  | 72.1%  | 78.5%  | 79.6%  | A1         | +   | 1   |
| 64.9%  | 72.4%  | 73.6%  | 75.5%  | A1         | +   | 8   |
| 64.9%  | 74.0%  | 58.4%  | 62.7%  | A1, G7     | +   | 58  |
| 64.9%  | 73.1%  | 62.4%  | 66.6%  | G5         | +   | 67  |
| 64.9%  | 70.7%  | 56.3%  | 59.5%  | G7         | +   | 33  |
| 64.8%  | 74.9%  | 61.6%  | 65.5%  | A1, G7     | ×   | 58  |
| 64.7%  | 69.8%  | 67.2%  | 69.8%  | G5         | +   | 95  |

| S. Cls | S. Tot | C. Cls | C. Tot | CNNs | Op. | CRF |
|--------|--------|--------|--------|------|-----|-----|
| 64.7%  | 69.8%  | 67.1%  | 69.8%  | G5   | +   | 96  |
| 64.7%  | 69.8%  | 67.3%  | 69.8%  | G5   | +   | 97  |
| 64.6%  | 70.9%  | 56.6%  | 60.3%  | G7   | +   | 21  |
| 64.6%  | 72.1%  | 72.2%  | 74.1%  | A1   | +   | 65  |
| 64.6%  | 69.6%  | 67.3%  | 69.8%  | G5   | +   | 98  |
| 64.4%  | 70.4%  | 56.9%  | 60.3%  | G7   | +   | 43  |
| 64.4%  | 70.6%  | 57.4%  | 61.1%  | G7   | +   | 55  |
| 64.4%  | 70.5%  | 57.4%  | 61.0%  | G7   | +   | 52  |
| 64.4%  | 70.7%  | 54.8%  | 58.5%  | G7   | +   | 37  |
| 64.3%  | 71.3%  | 77.6%  | 78.4%  | A1   | +   | 2   |
| 64.3%  | 71.3%  | 76.8%  | 77.6%  | A1   | +   | 4   |
| 64.3%  | 70.1%  | 57.7%  | 60.9%  | G7   | +   | 1   |
| 64.3%  | 70.1%  | 57.7%  | 60.9%  | G7   | +   | 53  |
| 64.3%  | 70.7%  | 56.3%  | 60.0%  | G7   | +   | 18  |
| 64.3%  | 70.4%  | 57.4%  | 61.0%  | G7   | +   | 59  |
| 64.2%  | 70.4%  | 55.9%  | 59.6%  | G7   | +   | 40  |
| 64.2%  | 71.7%  | 75.9%  | 78.1%  | A1   | +   | 9   |
| 64.2%  | 70.7%  | 56.0%  | 59.9%  | G7   | +   | 28  |
| 64.2%  | 70.6%  | 56.0%  | 59.8%  | G7   | +   | 19  |
| 64.2%  | 70.6%  | 56.0%  | 59.8%  | G7   | +   | 20  |
| 64.1%  | 70.8%  | 54.3%  | 58.5%  | G7   | +   | 12  |
| 64.1%  | 70.5%  | 56.1%  | 59.9%  | G7   | +   | 42  |
| 64.1%  | 72.3%  | 53.7%  | 58.6%  | G5   | +   | 75  |
| 64.0%  | 71.4%  | 53.7%  | 57.9%  | G5   | +   | 69  |
| 64.0%  | 70.7%  | 54.8%  | 58.9%  | G7   | +   | 13  |
| 64.0%  | 70.7%  | 54.8%  | 58.8%  | G7   | +   | 5   |
| 64.0%  | 70.7%  | 54.8%  | 58.8%  | G7   | +   | 11  |
| 64.0%  | 72.5%  | 64.4%  | 67.7%  | A2   | +   | 99  |
| 64.0%  | 70.6%  | 54.9%  | 58.9%  | G7   | +   | 15  |
| 64.0%  | 69.6%  | 58.9%  | 62.2%  | G7   | +   | 4   |
| 63.9%  | 70.0%  | 58.5%  | 62.0%  | G7   | +   | 62  |
| 63.9%  | 70.0%  | 58.6%  | 62.1%  | G7   | +   | 64  |
| 63.9%  | 70.3%  | 55.4%  | 59.2%  | G7   | +   | 3   |
| 63.9%  | 70.3%  | 55.4%  | 59.2%  | G7   | +   | 38  |
| 63.9%  | 70.3%  | 55.4%  | 59.2%  | G7   | +   | 39  |
| 63.9%  | 70.3%  | 55.4%  | 59.2%  | G7   | +   | 41  |
| 63.9%  | 70.6%  | 54.0%  | 58.2%  | G7   | +   | 16  |
| 63.9%  | 70.6%  | 53.6%  | 57.8%  | G7   | +   | 10  |
| 63.9%  | 69.4%  | 59.0%  | 62.3%  | G7   | +   | 2   |
| 63.9%  | 70.6%  | 53.9%  | 58.1%  | G7   | +   | 14  |
| 63.9%  | 70.6%  | 53.9%  | 58.1%  | G7   | +   | 6   |
| 63.8%  | 70.7%  | 54.0%  | 58.2%  | G7   | +   | 17  |
| 63.8%  | 69.9%  | 58.6%  | 62.0%  | G7   | +   | 66  |
| 63.8%  | 69.9%  | 58.3%  | 61.8%  | G7   | +   | 63  |
| 63.7%  | 70.5%  | 53.5%  | 57.7%  | G7   | +   | 22  |
| 63.7%  | 70.6%  | 53.3%  | 57.6%  | G7   | +   | 24  |
| 63.7%  | 70.7%  | 53.4%  | 57.7%  | G7   | +   | 27  |
| 63.7%  | 70.5%  | 53.4%  | 57.6%  | G7   | +   | 23  |
| 63.7%  | 70.6%  | 53.3%  | 57.5%  | G7   | +   | 25  |
| 63.7%  | 70.7%  | 53.4%  | 57.6%  | G7   | +   | 31  |
| 63.7%  | 70.6%  | 53.3%  | 57.5%  | G7   | +   | 8   |
| 63.7%  | 70.6%  | 53.2%  | 57.5%  | G7   | +   | 32  |
| 63.7%  | 70.5%  | 53.3%  | 57.5%  | G7   | +   | 29  |
| 63.7%  | 70.7%  | 53.3%  | 57.5%  | G7   | +   | 35  |
| 63.7%  | 70.6%  | 53.2%  | 57.5%  | G7   | +   | 34  |
| 63.7%  | 70.5%  | 53.3%  | 57.5%  | G7   | +   | 30  |
| 63.7%  | 70.7%  | 53.3%  | 57.5%  | G7   | +   | 36  |
| 63.6%  | 71.9%  | 58.7%  | 63.6%  | G1   | +   | 100 |
| 63.6%  | 70.3%  | 54.1%  | 58.2%  | G7   | +   | 26  |

| S. Cls | S. Tot | C. Cls | C. Tot | CNNs | Op. | CRF |
|--------|--------|--------|--------|------|-----|-----|
| 63.5%  | 71.3%  | 56.7%  | 60.8%  | G7   | +   | 84  |
| 63.5%  | 69.5%  | 59.0%  | 62.4%  | G7   | +   | 68  |
| 63.5%  | 71.3%  | 56.6%  | 60.8%  | G7   | +   | 85  |
| 63.5%  | 71.3%  | 56.5%  | 60.6%  | G7   | +   | 86  |
| 63.5%  | 70.5%  | 52.3%  | 56.6%  | G7   | +   | 51  |
| 63.5%  | 71.3%  | 56.2%  | 60.4%  | G7   | +   | 87  |
| 63.4%  | 71.4%  | 56.0%  | 60.3%  | G7   | +   | 88  |
| 63.4%  | 71.3%  | 65.9%  | 68.5%  | A1   | +   | 49  |
| 63.4%  | 70.3%  | 52.4%  | 56.7%  | G7   | +   | 54  |
| 63.4%  | 71.4%  | 55.8%  | 60.0%  | G7   | +   | 89  |
| 63.3%  | 71.4%  | 55.5%  | 59.8%  | G7   | +   | 90  |
| 63.2%  | 71.4%  | 55.2%  | 59.6%  | G7   | +   | 91  |
| 63.2%  | 71.4%  | 55.1%  | 59.6%  | G7   | +   | 92  |
| 63.2%  | 71.4%  | 66.1%  | 68.3%  | A1   | +   | 58  |
| 63.2%  | 69.0%  | 59.9%  | 63.1%  | G7   | +   | 70  |
| 63.2%  | 71.4%  | 55.1%  | 59.5%  | G7   | +   | 93  |
| 63.2%  | 71.4%  | 55.0%  | 59.5%  | G7   | +   | 94  |
| 63.2%  | 69.0%  | 59.6%  | 62.9%  | G7   | +   | 73  |
| 63.2%  | 69.0%  | 59.6%  | 62.9%  | G7   | +   | 74  |
| 63.2%  | 69.0%  | 59.8%  | 63.0%  | G7   | +   | 77  |
| 63.1%  | 70.1%  | 52.5%  | 56.7%  | G7   | +   | 44  |
| 63.1%  | 70.1%  | 52.5%  | 56.7%  | G7   | +   | 45  |
| 63.1%  | 68.9%  | 59.5%  | 62.8%  | G7   | +   | 76  |
| 63.1%  | 70.1%  | 52.4%  | 56.7%  | G7   | +   | 46  |
| 63.1%  | 68.8%  | 59.6%  | 62.8%  | G7   | +   | 78  |
| 63.1%  | 70.0%  | 52.3%  | 56.6%  | G7   | +   | 47  |
| 63.1%  | 70.0%  | 52.3%  | 56.5%  | G7   | +   | 48  |
| 63.0%  | 70.1%  | 54.4%  | 58.6%  | G7   | +   | 50  |
| 63.0%  | 70.3%  | 51.0%  | 55.6%  | G7   | +   | 49  |
| 63.0%  | 68.7%  | 59.3%  | 62.6%  | G7   | +   | 79  |
| 62.9%  | 69.1%  | 59.6%  | 63.0%  | G7   | +   | 82  |
| 62.8%  | 68.3%  | 59.7%  | 62.8%  | G7   | +   | 80  |
| 62.8%  | 66.3%  | 63.5%  | 63.6%  | G7   | +   | 7   |
| 62.8%  | 69.3%  | 53.4%  | 57.5%  | G7   | +   | 56  |
| 62.7%  | 71.2%  | 52.5%  | 57.5%  | G5   | +   | 99  |
| 62.7%  | 69.9%  | 51.1%  | 55.5%  | G7   | +   | 60  |
| 62.7%  | 68.3%  | 60.0%  | 63.1%  | G7   | +   | 83  |
| 62.4%  | 69.7%  | 50.1%  | 54.6%  | G7   | +   | 58  |
| 62.3%  | 69.8%  | 54.2%  | 58.5%  | G7   | +   | 57  |
| 62.3%  | 69.8%  | 54.2%  | 58.6%  | G7   | +   | 9   |
| 62.2%  | 67.6%  | 60.3%  | 63.3%  | G7   | +   | 95  |
| 62.2%  | 67.6%  | 60.3%  | 63.3%  | G7   | +   | 96  |
| 62.2%  | 67.6%  | 60.4%  | 63.4%  | G7   | +   | 97  |
| 62.2%  | 67.5%  | 60.3%  | 63.3%  | G7   | +   | 98  |
| 61.6%  | 70.7%  | 55.1%  | 60.5%  | G3   | +   | 100 |
| 61.5%  | 68.7%  | 49.3%  | 53.6%  | G7   | +   | 61  |
| 60.7%  | 68.8%  | 53.1%  | 57.7%  | G7   | +   | 67  |
| 60.4%  | 63.5%  | 80.2%  | 77.4%  | A1   | +   | 7   |
| 60.1%  | 68.3%  | 46.4%  | 51.5%  | G7   | +   | 75  |
| 59.3%  | 66.8%  | 46.0%  | 50.4%  | G7   | +   | 69  |
| 58.9%  | 68.5%  | 59.3%  | 63.5%  | A2   | +   | 100 |
| 58.8%  | 67.2%  | 44.7%  | 50.2%  | G7   | +   | 99  |
| 58.5%  | 67.8%  | 47.7%  | 53.4%  | G5   | +   | 100 |
| 54.0%  | 63.5%  | 39.8%  | 46.2%  | G7   | +   | 100 |

## References

- [1] S. Bell, P. Upchurch, N. Snively, and K. Bala. OpenSurfaces: A richly annotated catalog of surface appearance. *ACM Trans. on Graphics (SIGGRAPH)*, 32(4), 2013.
- [2] M. Cimpoi, S. Maji, I. Kokkinos, S. Mohamed, and A. Vedaldi. Describing textures in the wild. In *CVPR*, pages 3606–3613. IEEE, 2014.
